# Supplementary material for: Different Behavior of 2-Substituted 3-Nitro-2H-chromenes in the Reaction with Stabilized Azomethine Ylides Generated from α-Iminoesters
Source: MDPI journal article supplement (doi:10.3390/molecules27248983), 2022-12-16
Supplement: s1 [file s1]

*Supporting information for*

**Different behavior of 2-substituted 3-nitro-2*H*-chromenes in the reaction with stabilized azomethine ylides generated from  $\alpha$ -iminoesters**

Ivan A. Kochnev, Alexey Y. Barkov, Nikita S. Simonov, Maria V. Ulitko, Nikolay S. Zimmitskiy,

Vladislav Y. Korotaev\* and Vyacheslav Y. Sosnovskikh\*

Institute of Natural Sciences and Mathematics, Ural Federal University, 51 Lenina Ave.,

620000 Ekaterinburg, Russian Federation

E-mail: [korotev.vladislav@urfu.ru](mailto:korotev.vladislav@urfu.ru), [vy.sosnovskikh@urfu.ru](mailto:vy.sosnovskikh@urfu.ru)

**Table of Contents**

|                                                                                    |         |
|------------------------------------------------------------------------------------|---------|
| 1. Copies of $^1\text{H}$ and $^{13}\text{C}$ NMR spectra of synthesized compounds | S2–S34  |
| 2. Copies of 2D NMR spectra of synthesized compounds                               | S35–S37 |
| 3. X-ray crystallography data                                                      | S38–S39 |
| 4. References                                                                      | S40     |

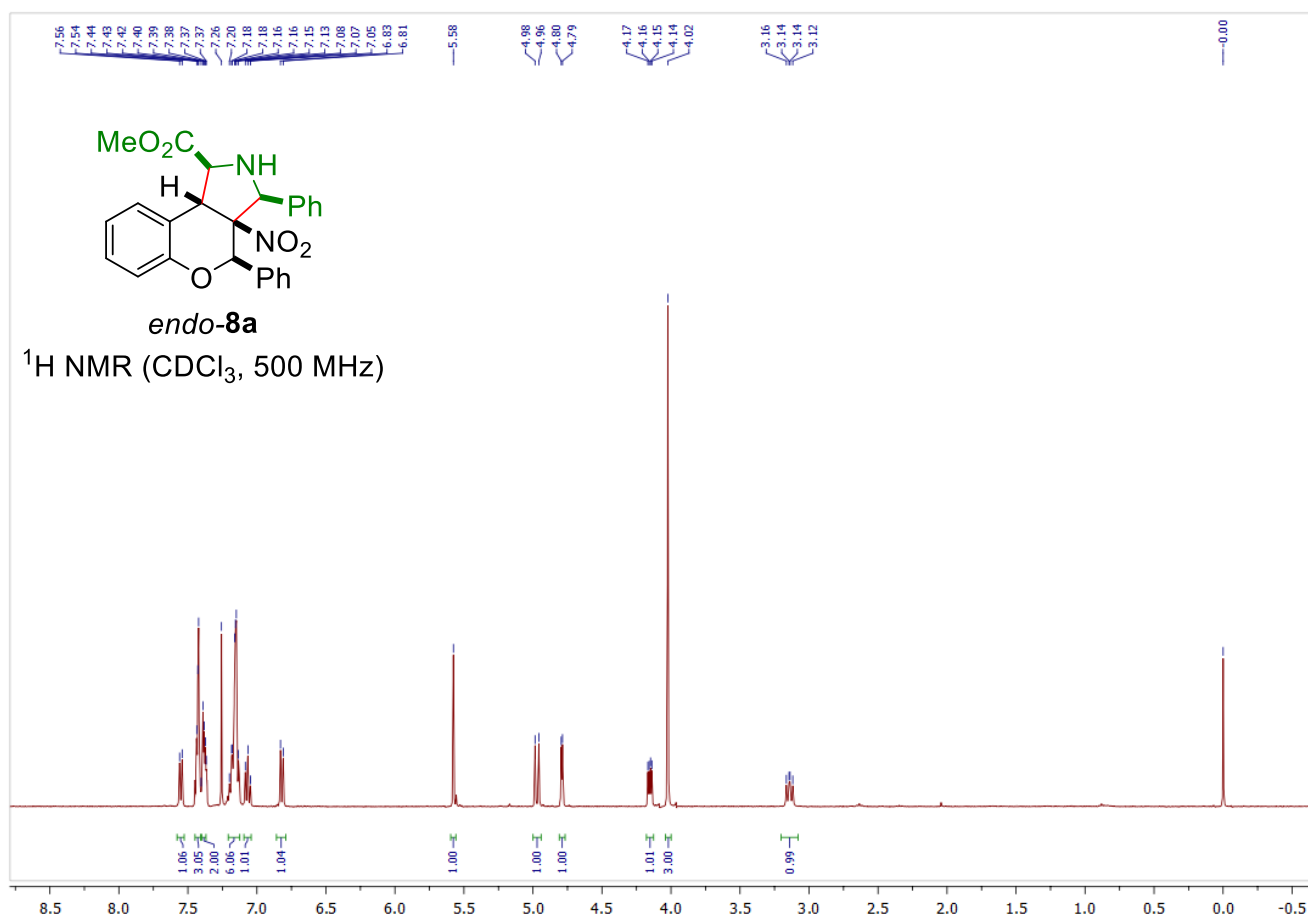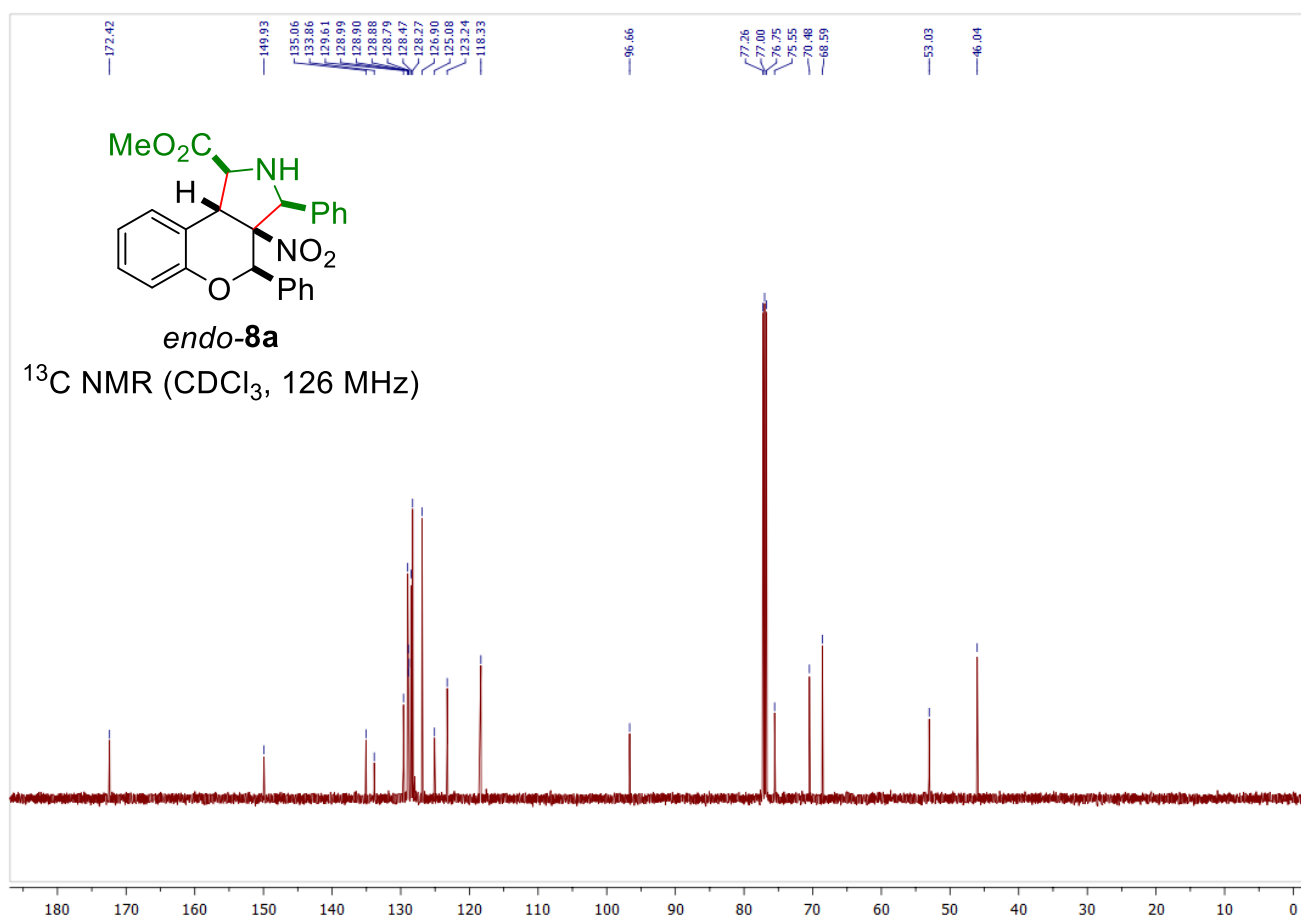

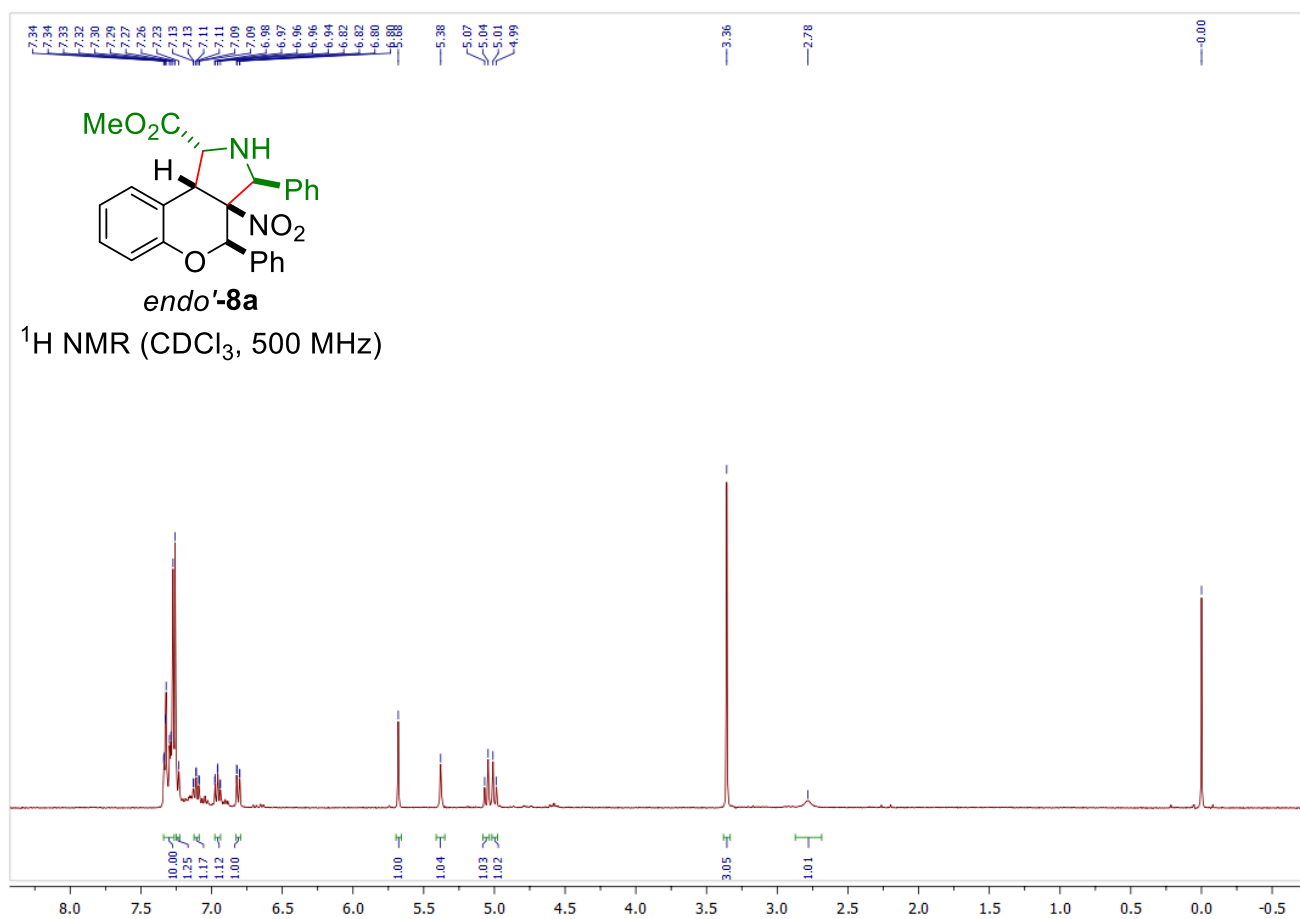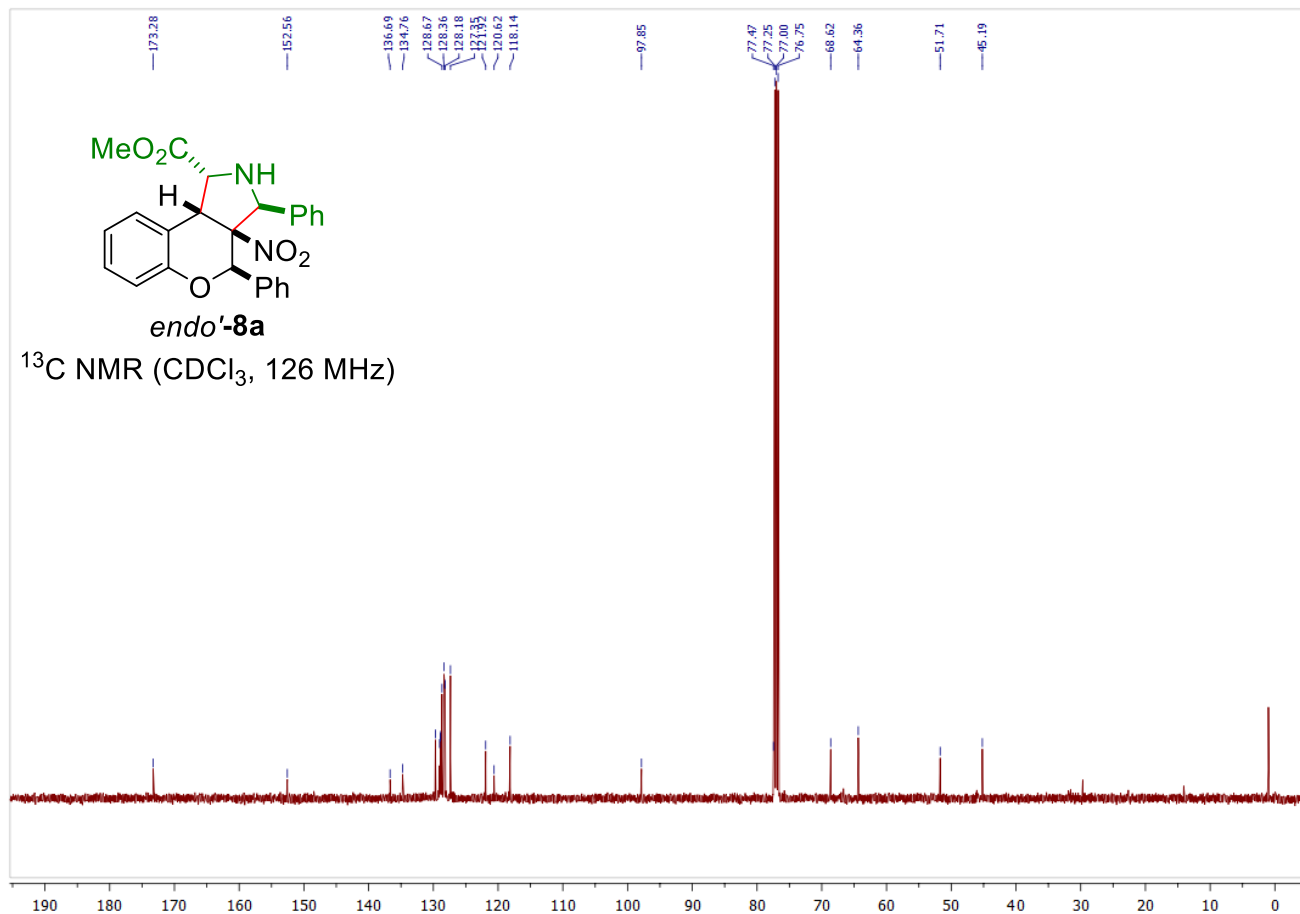

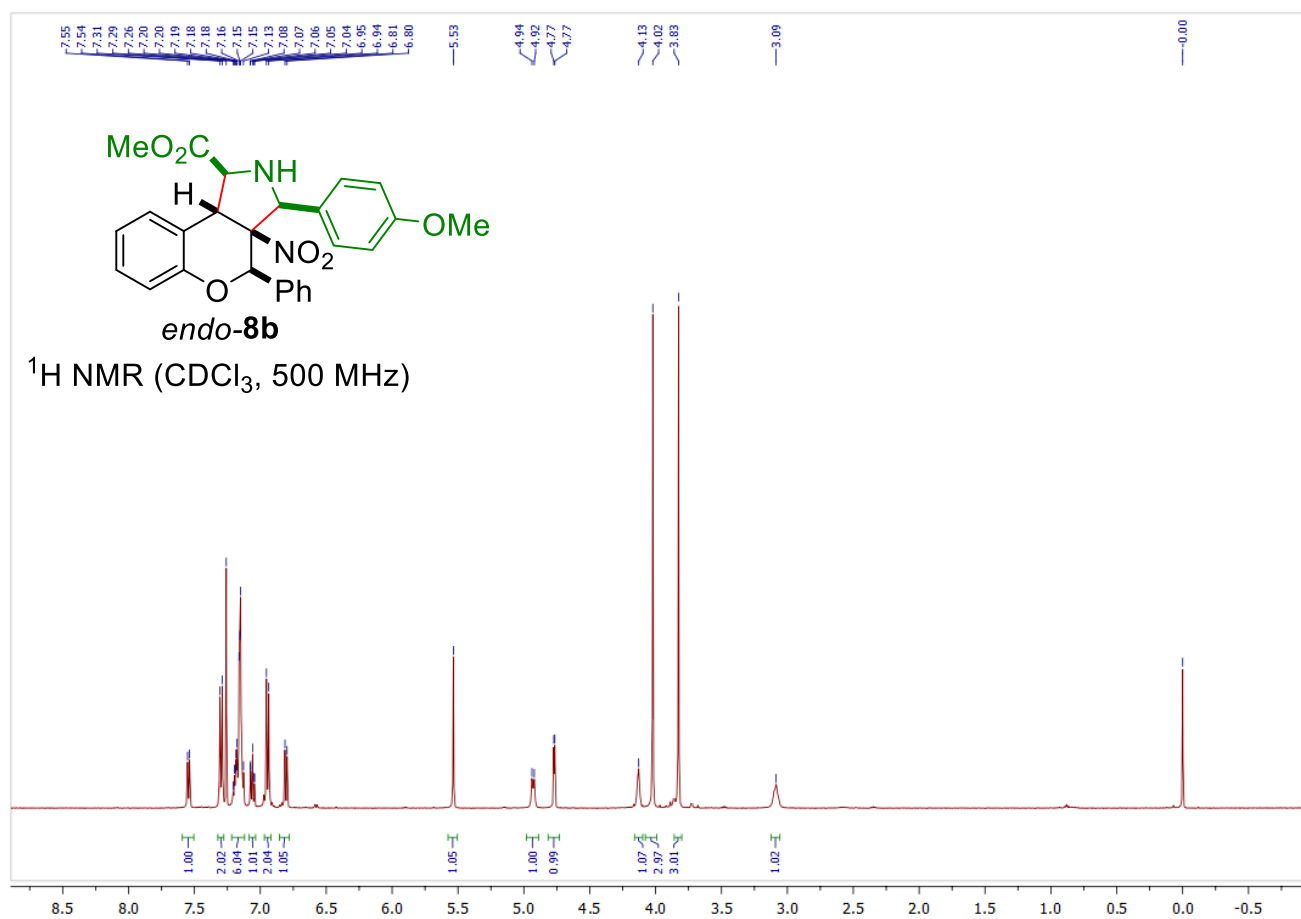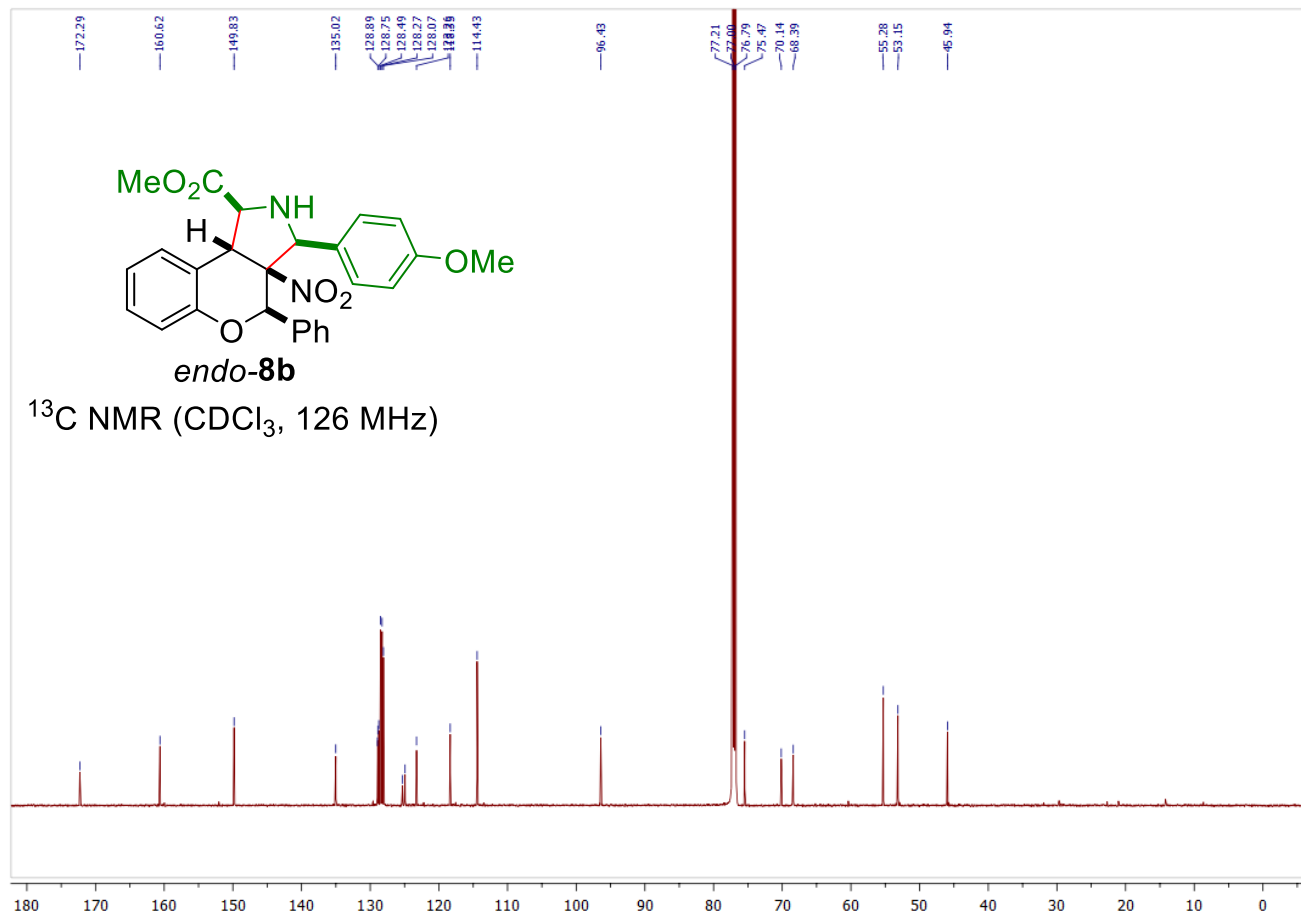

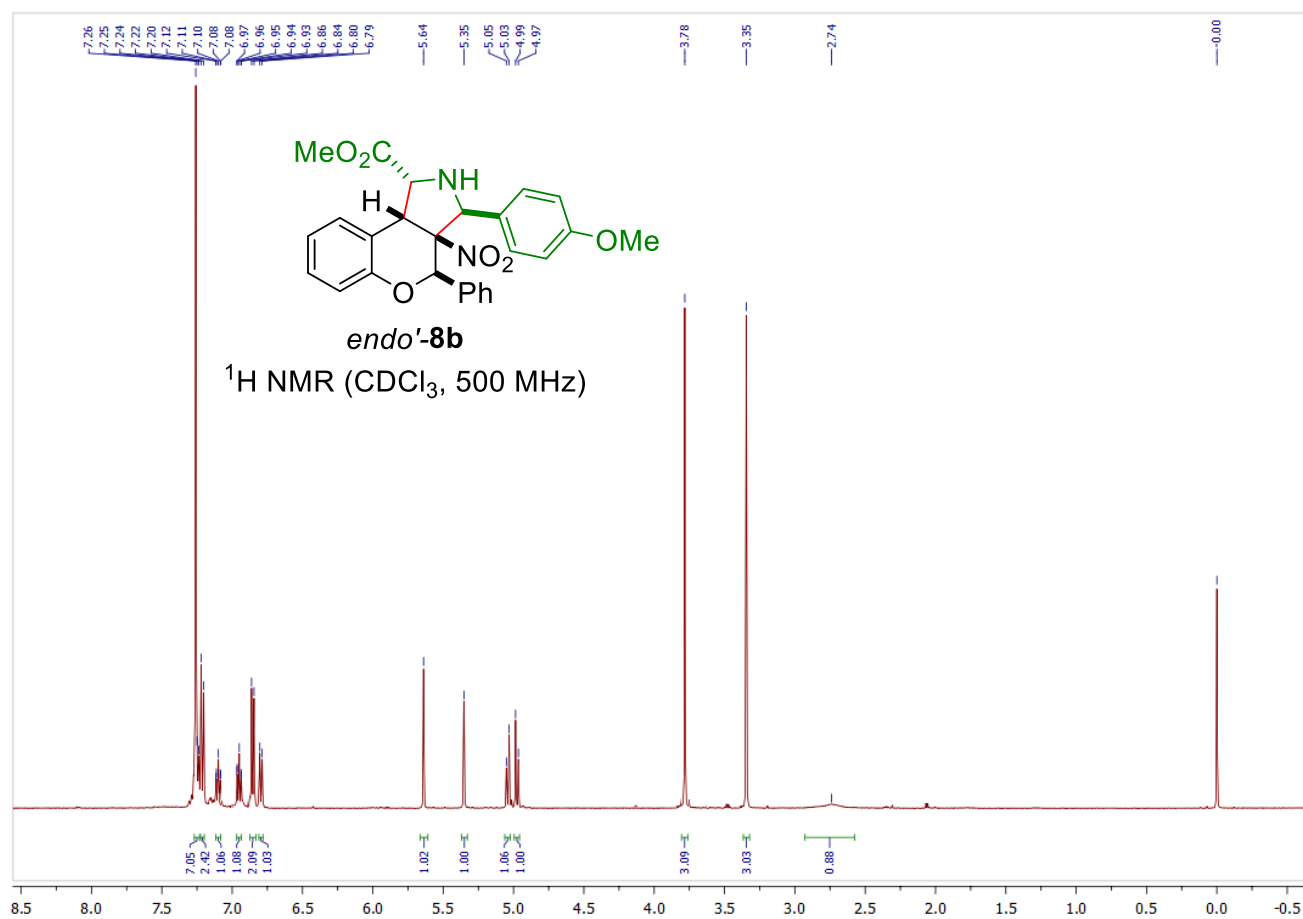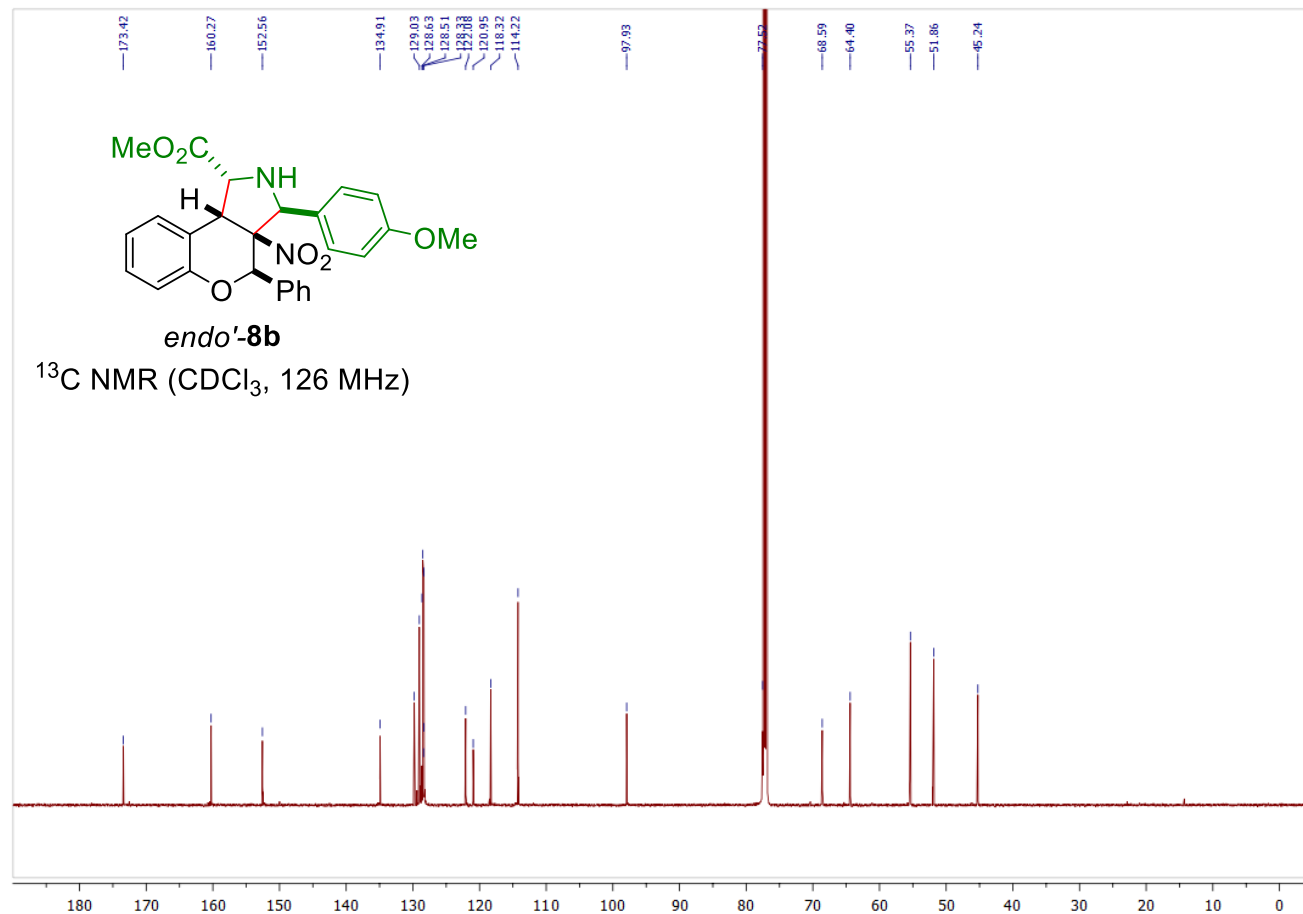

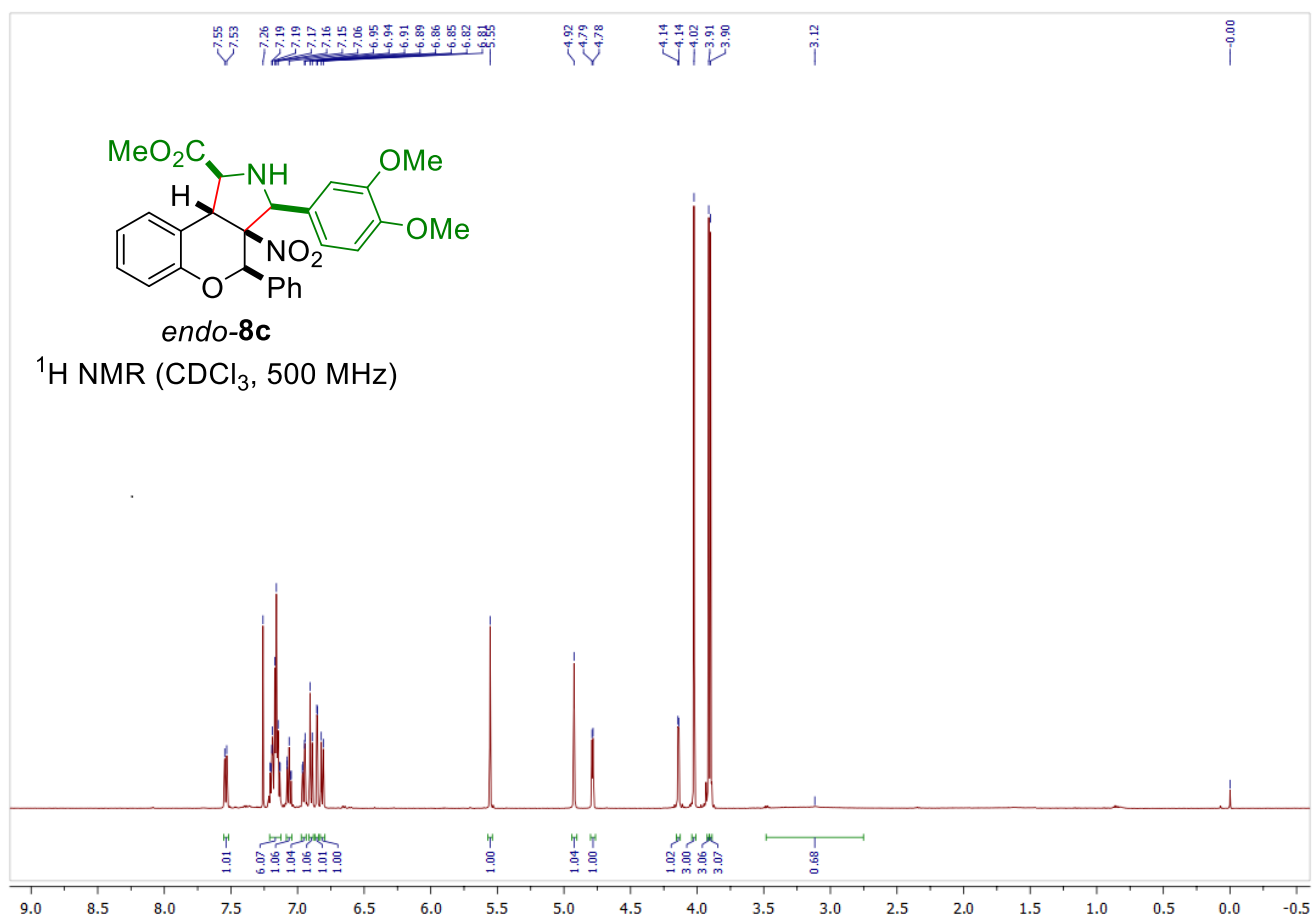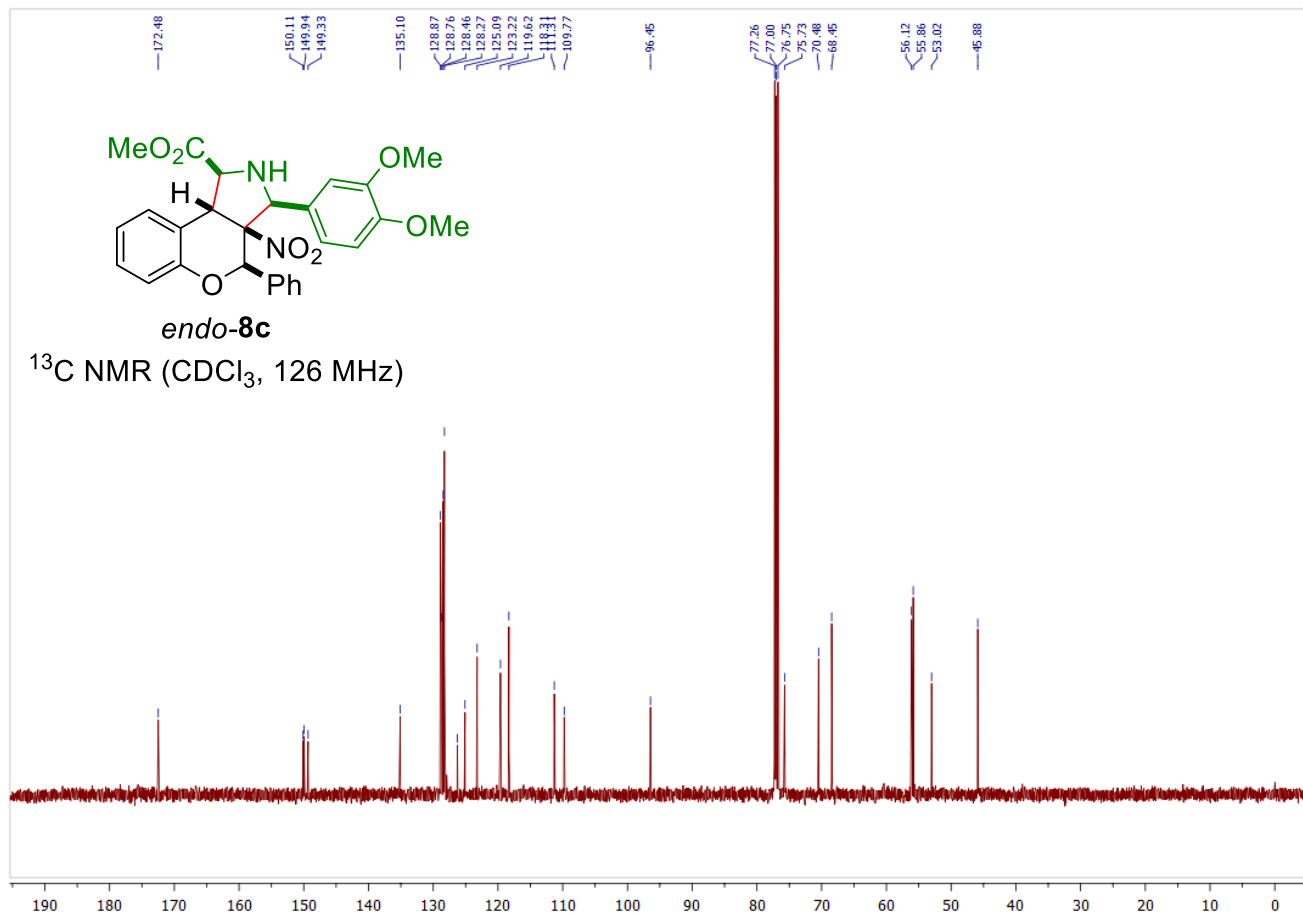

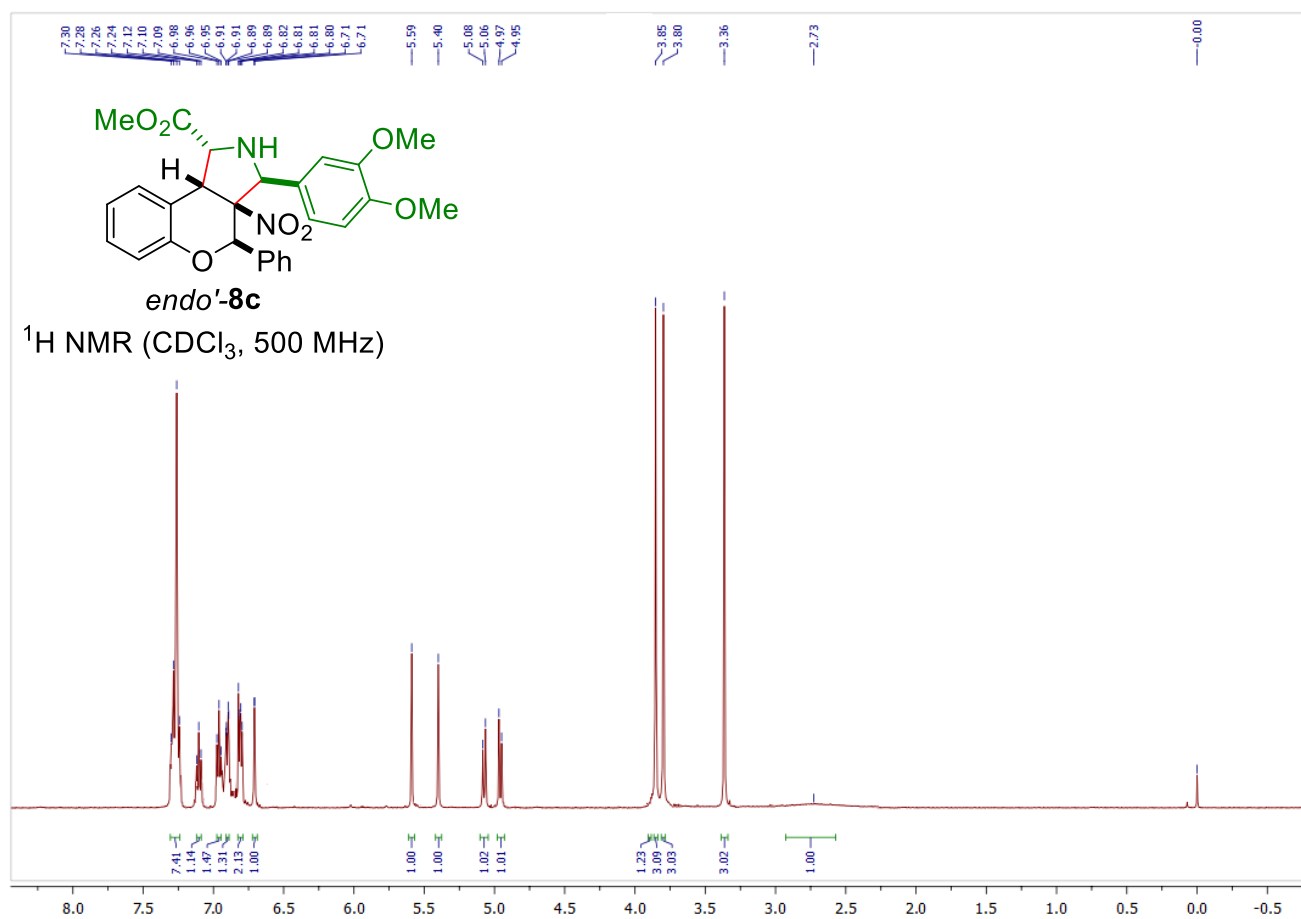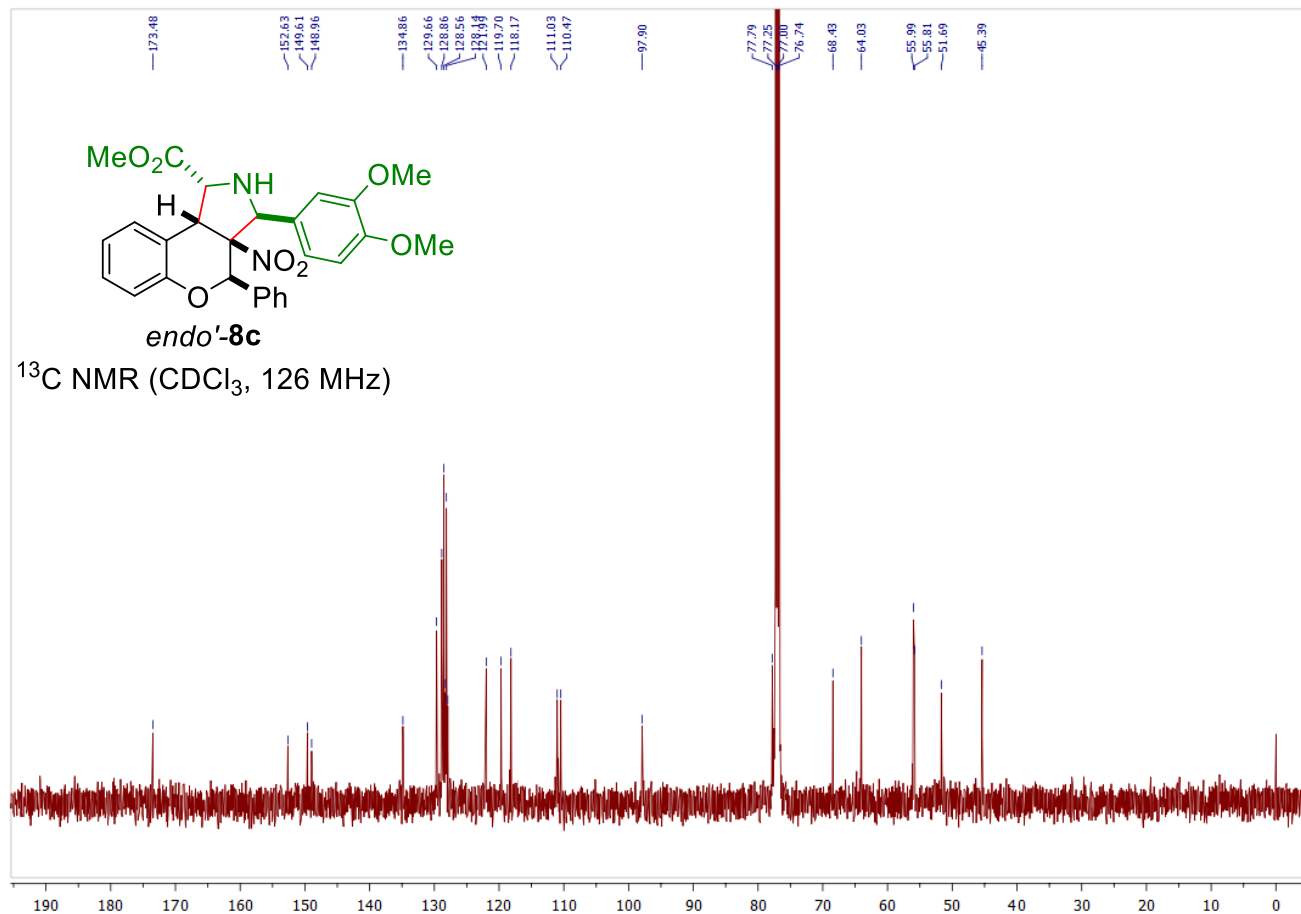

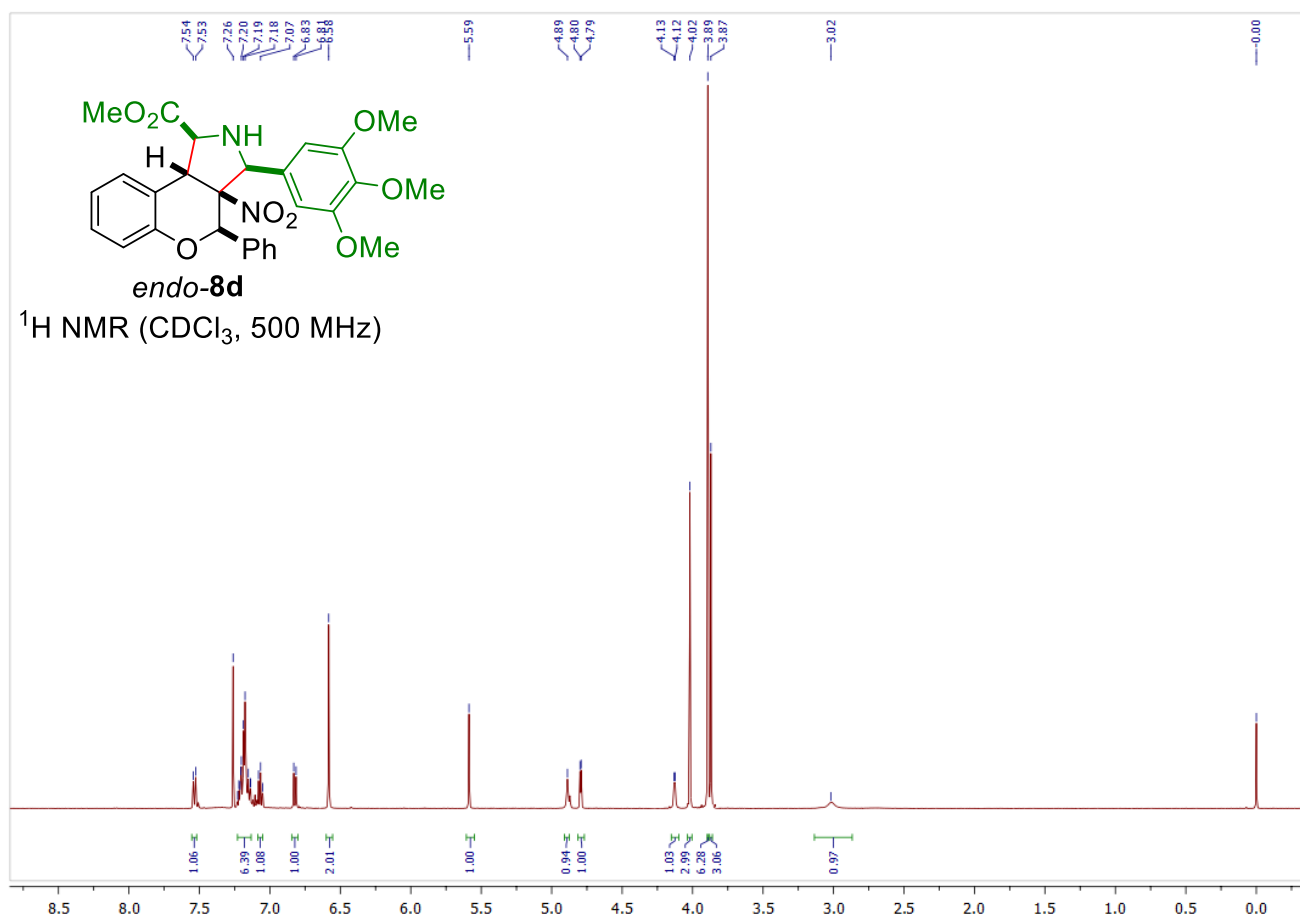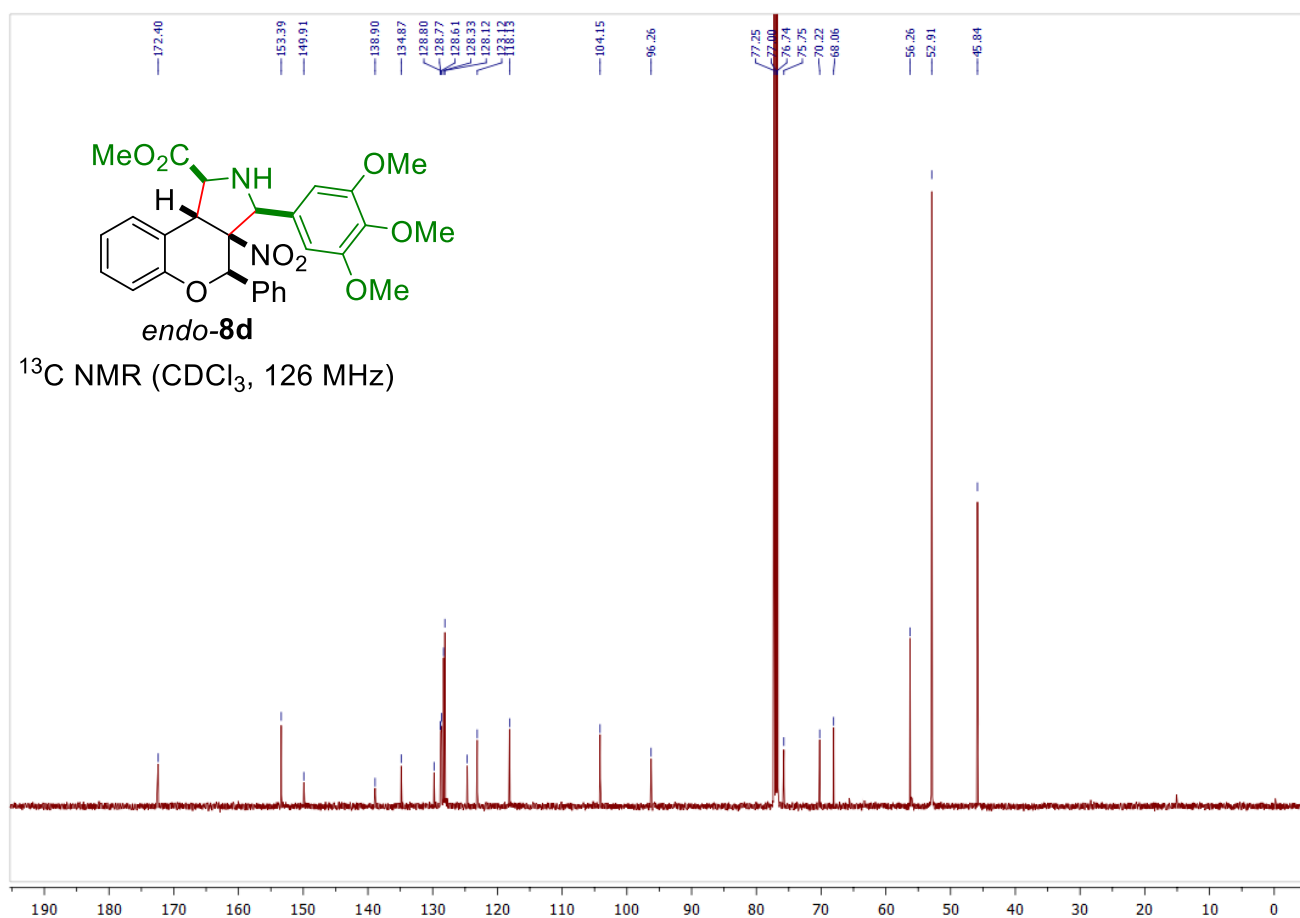



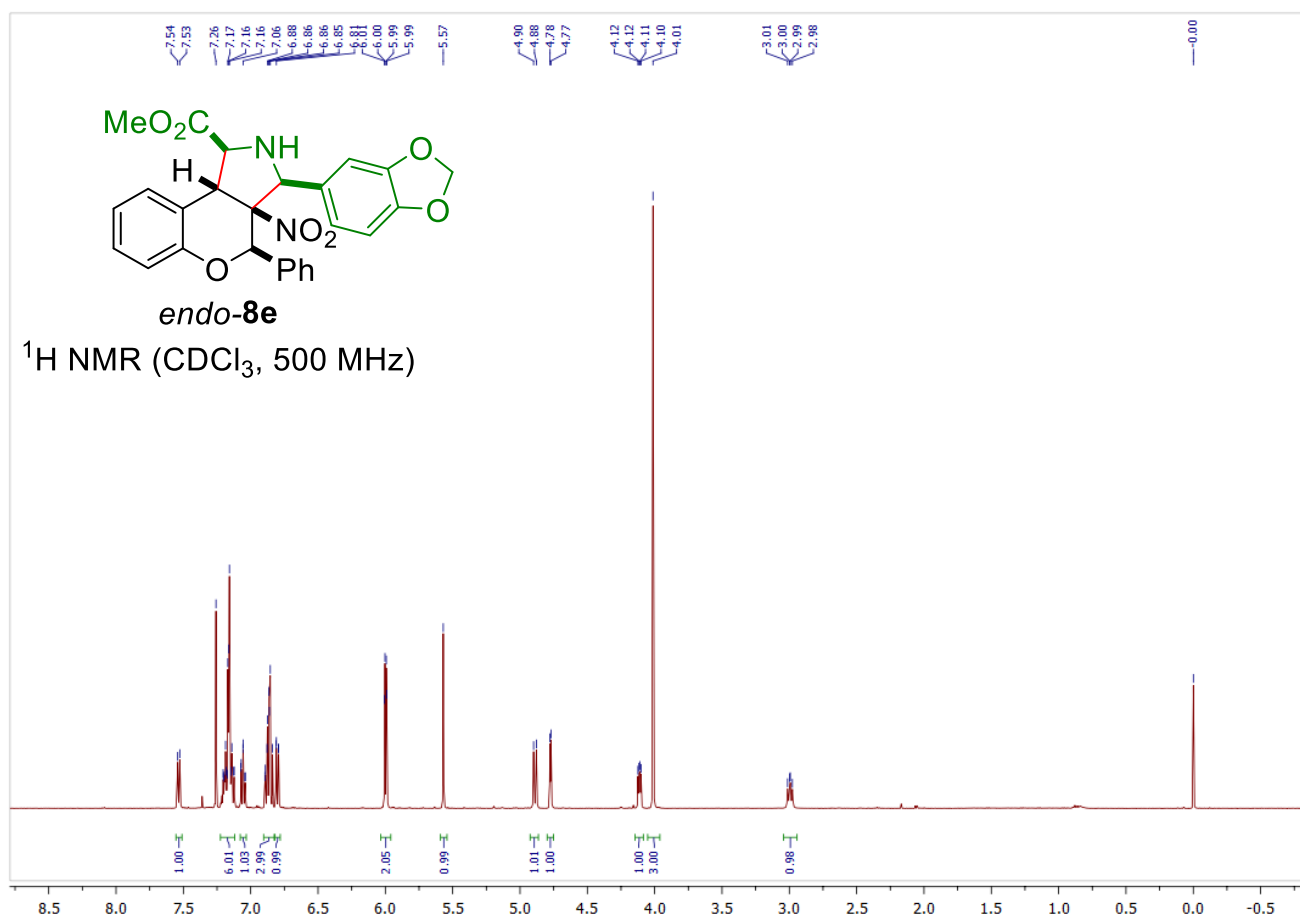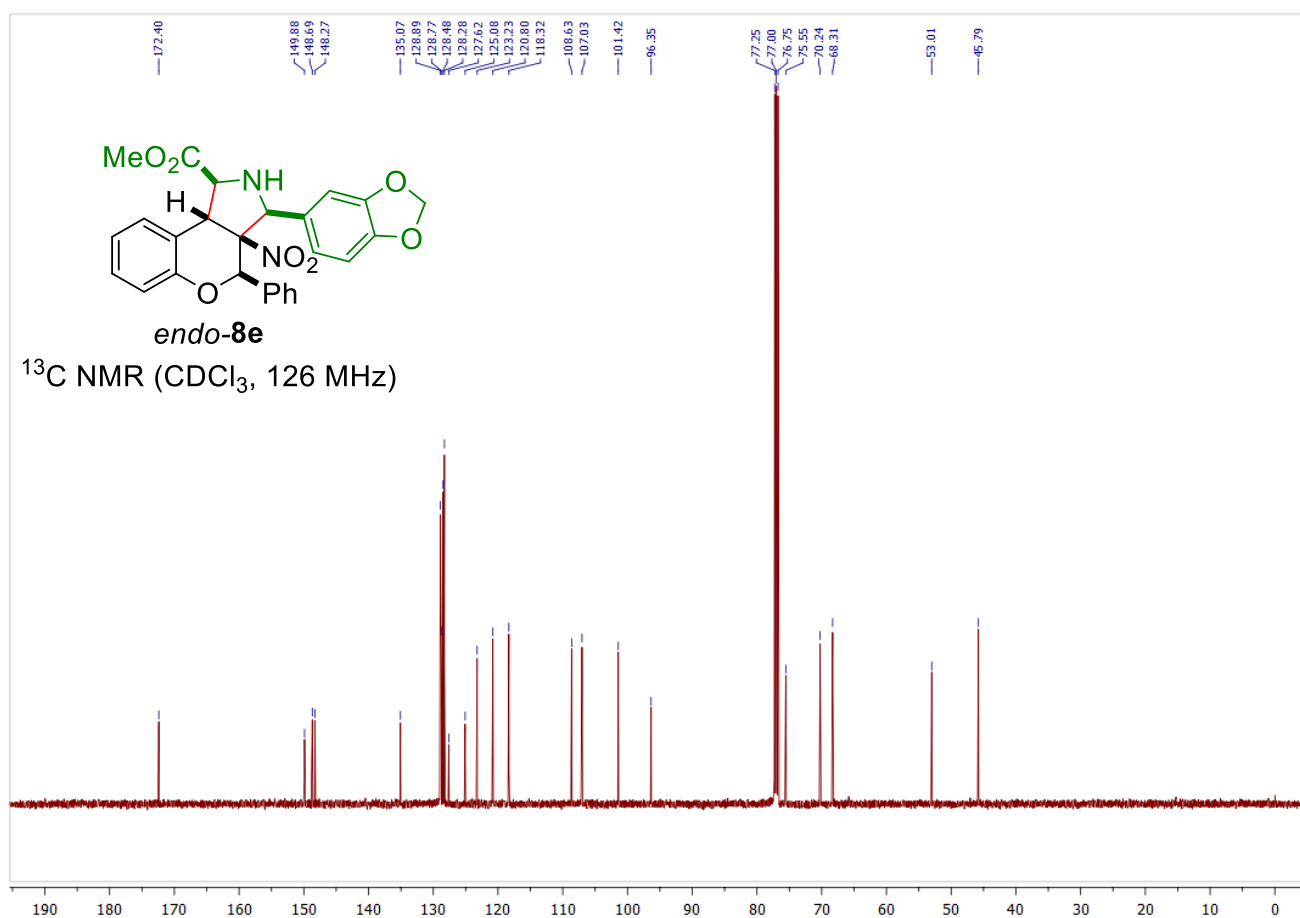

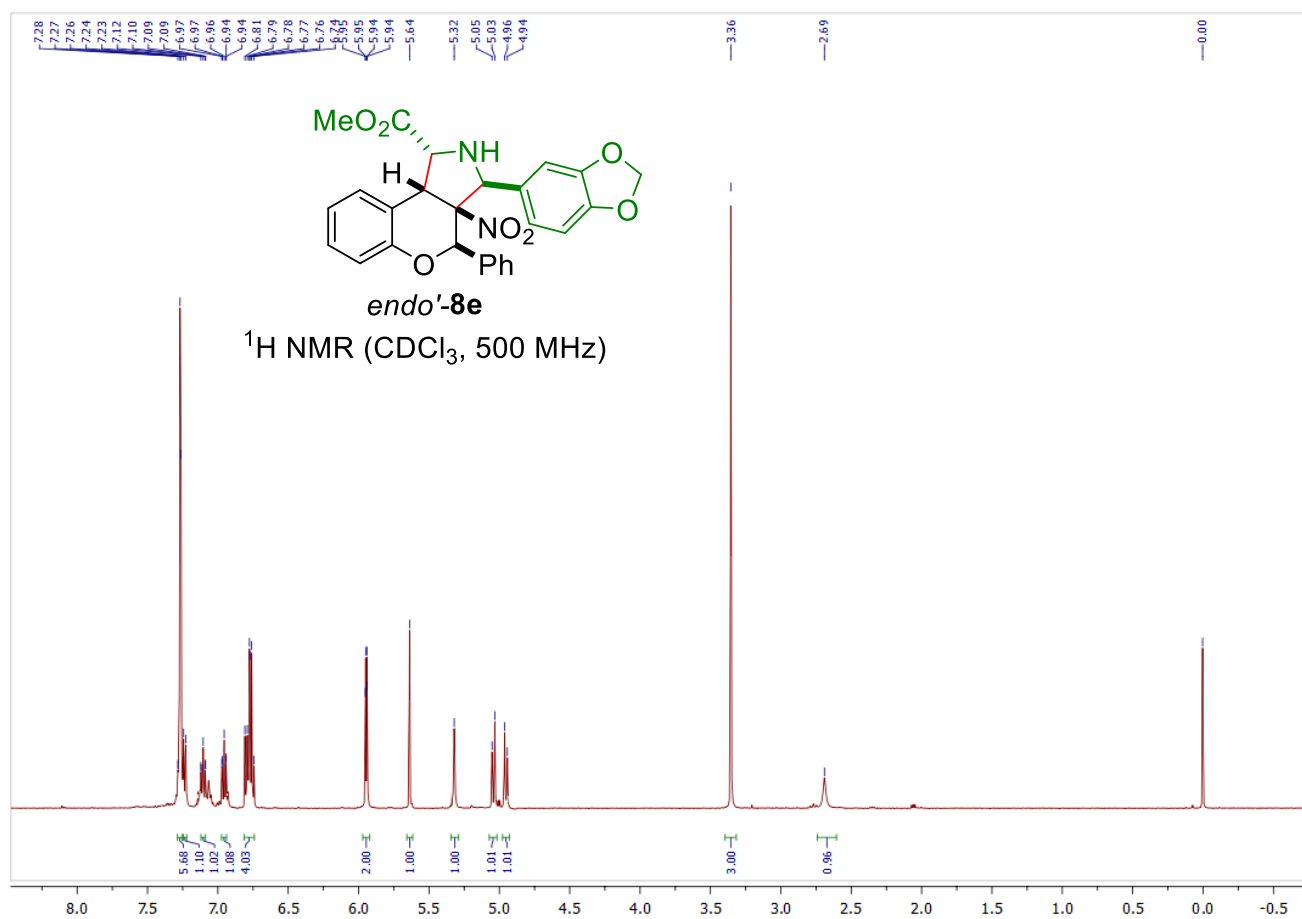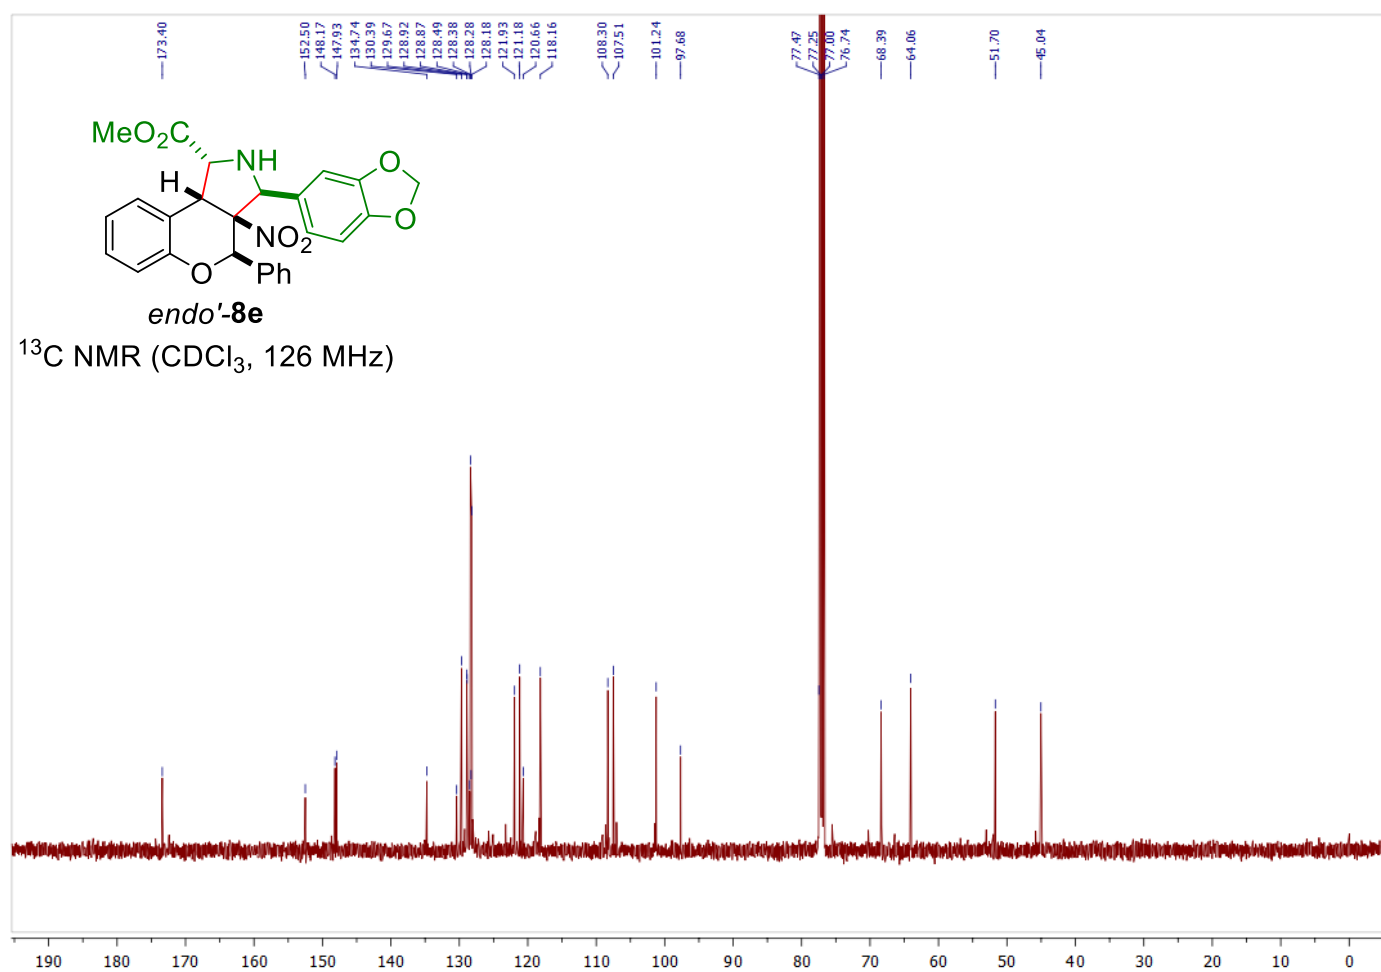

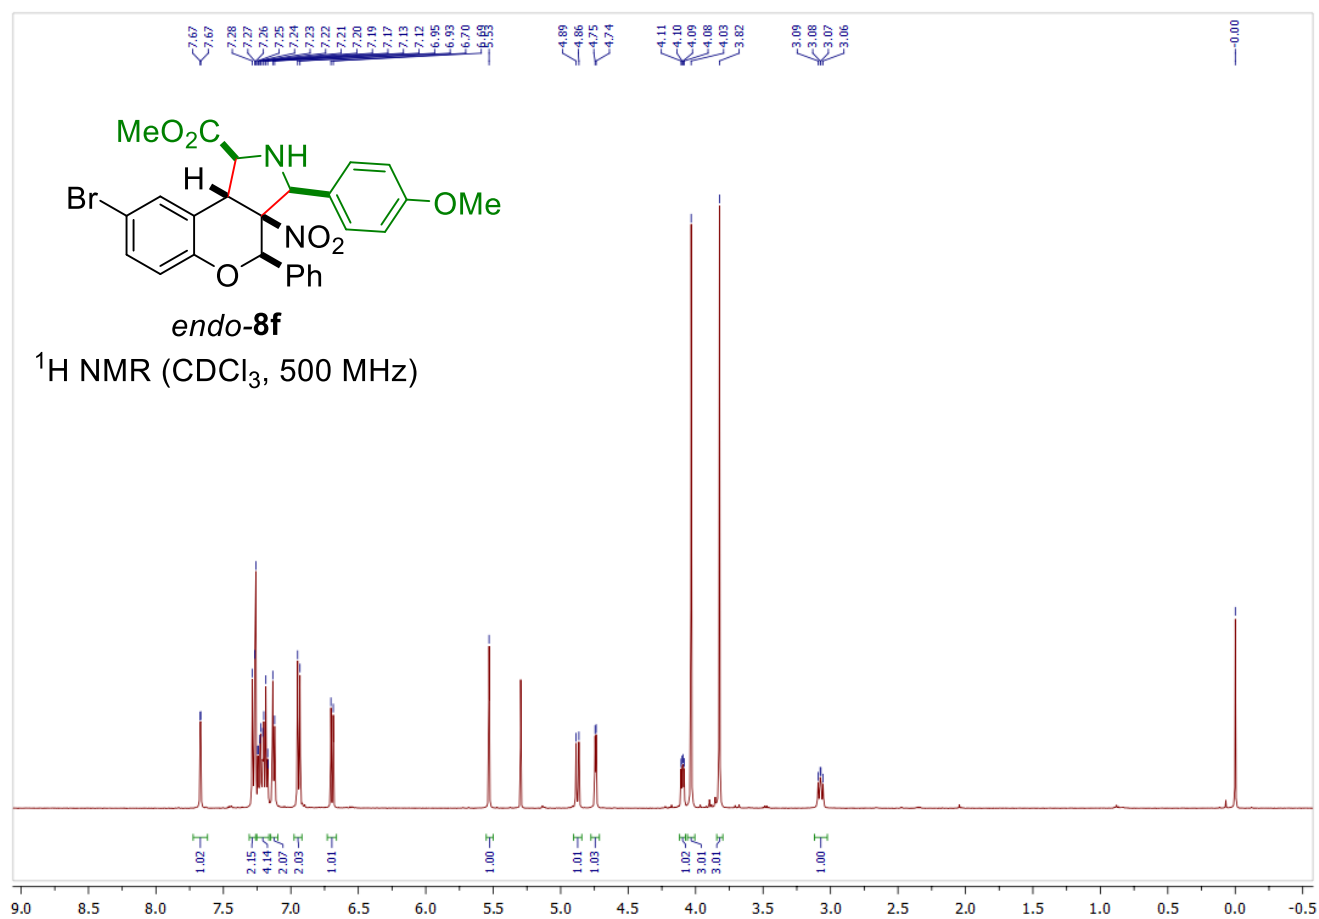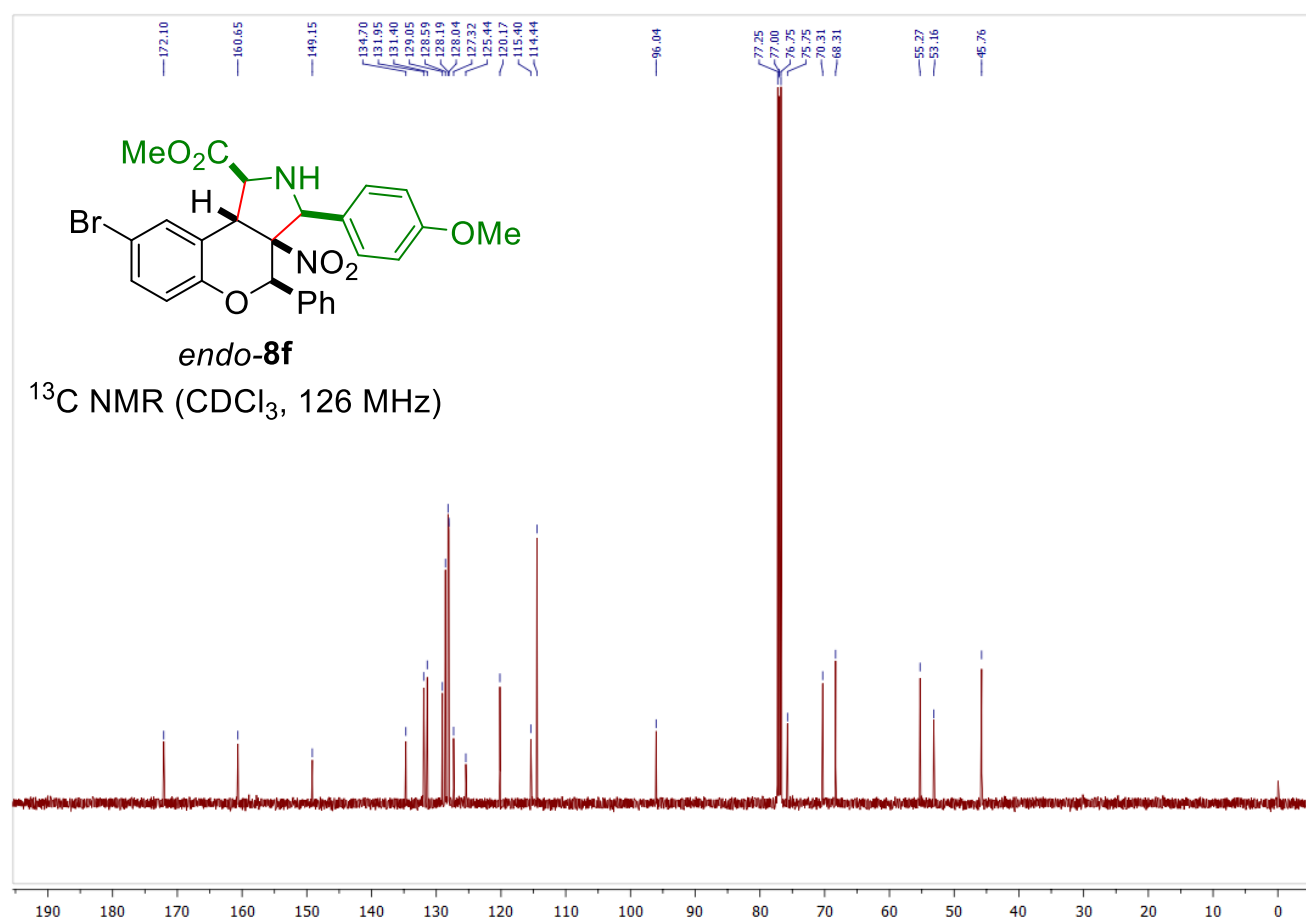

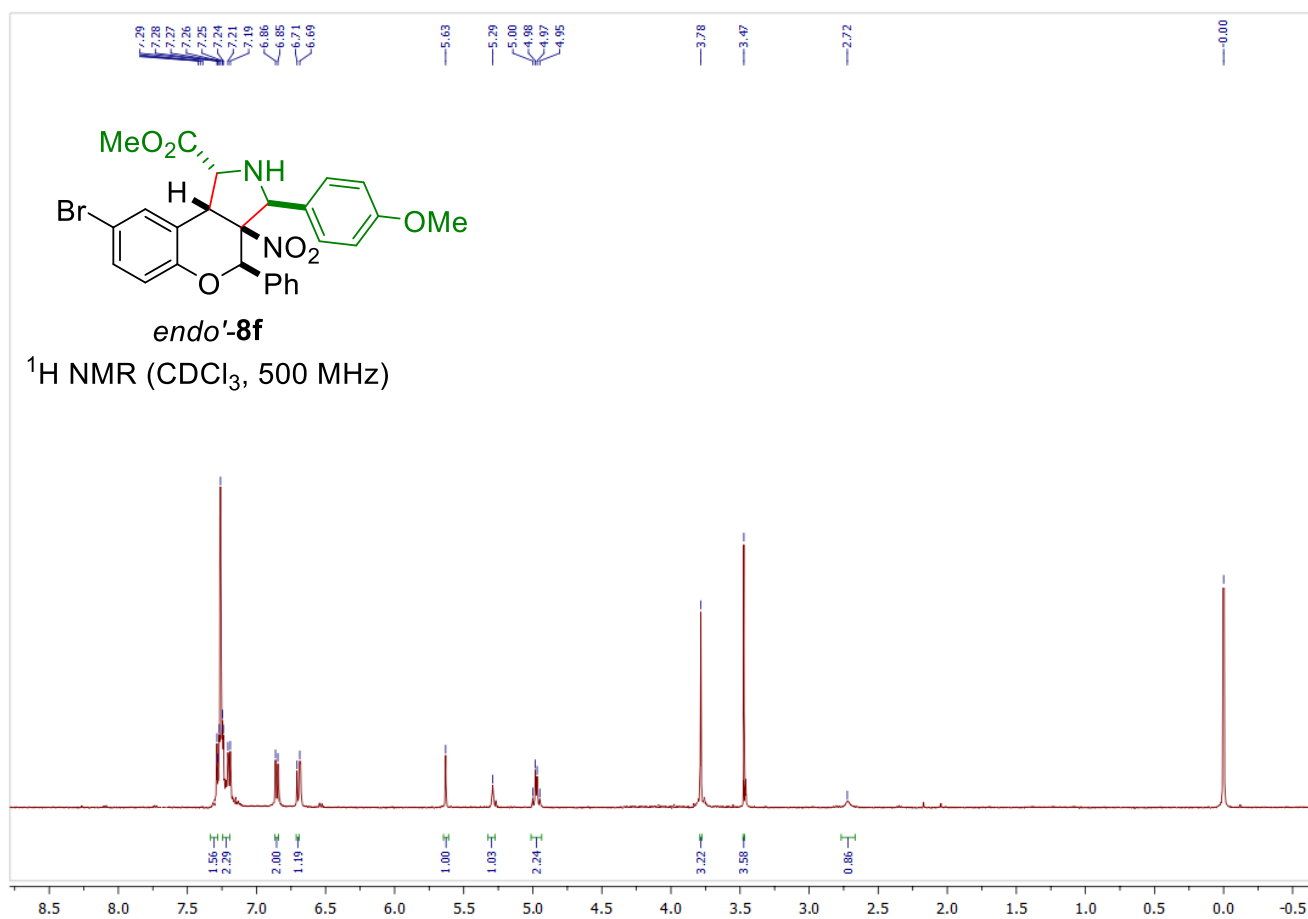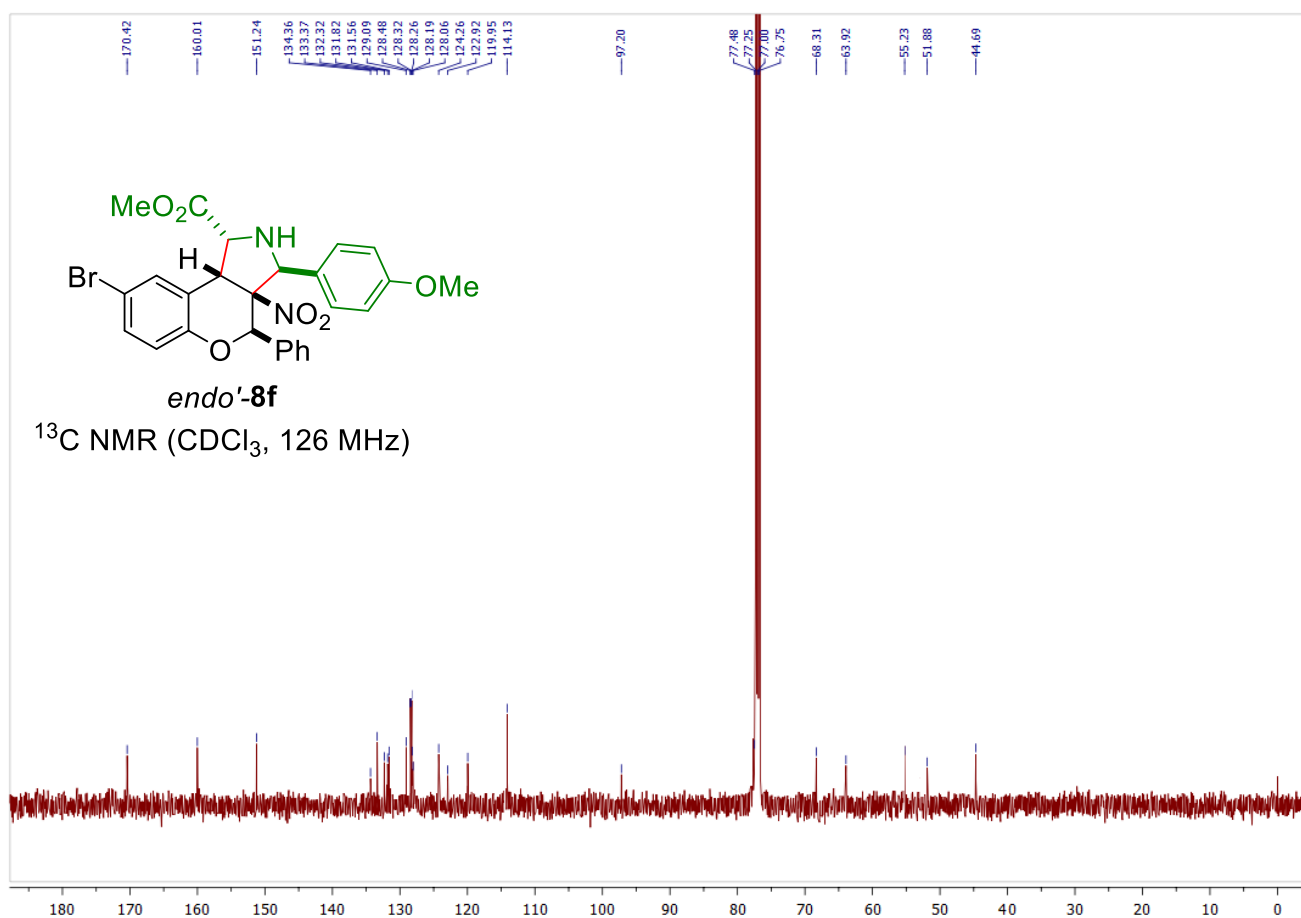

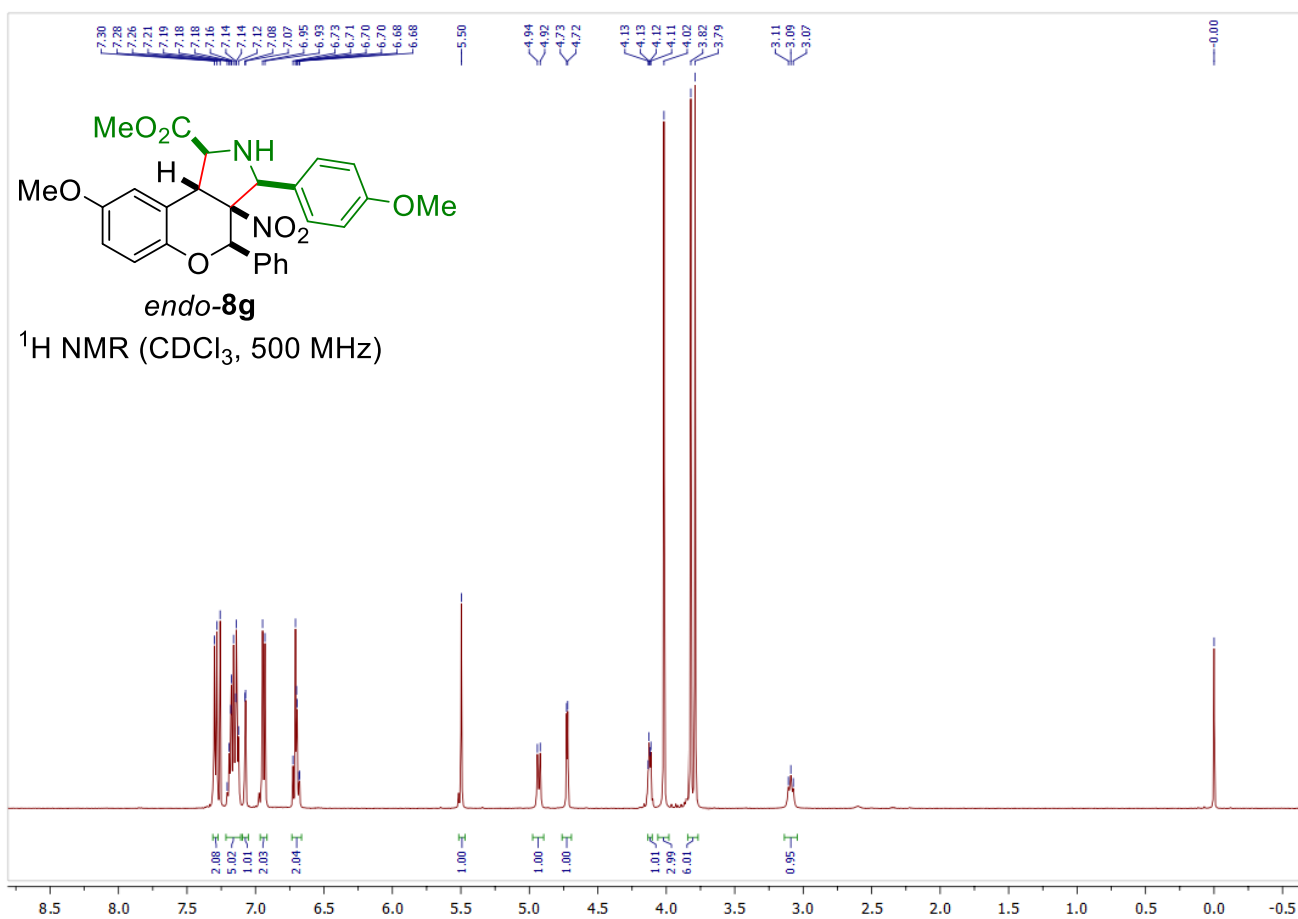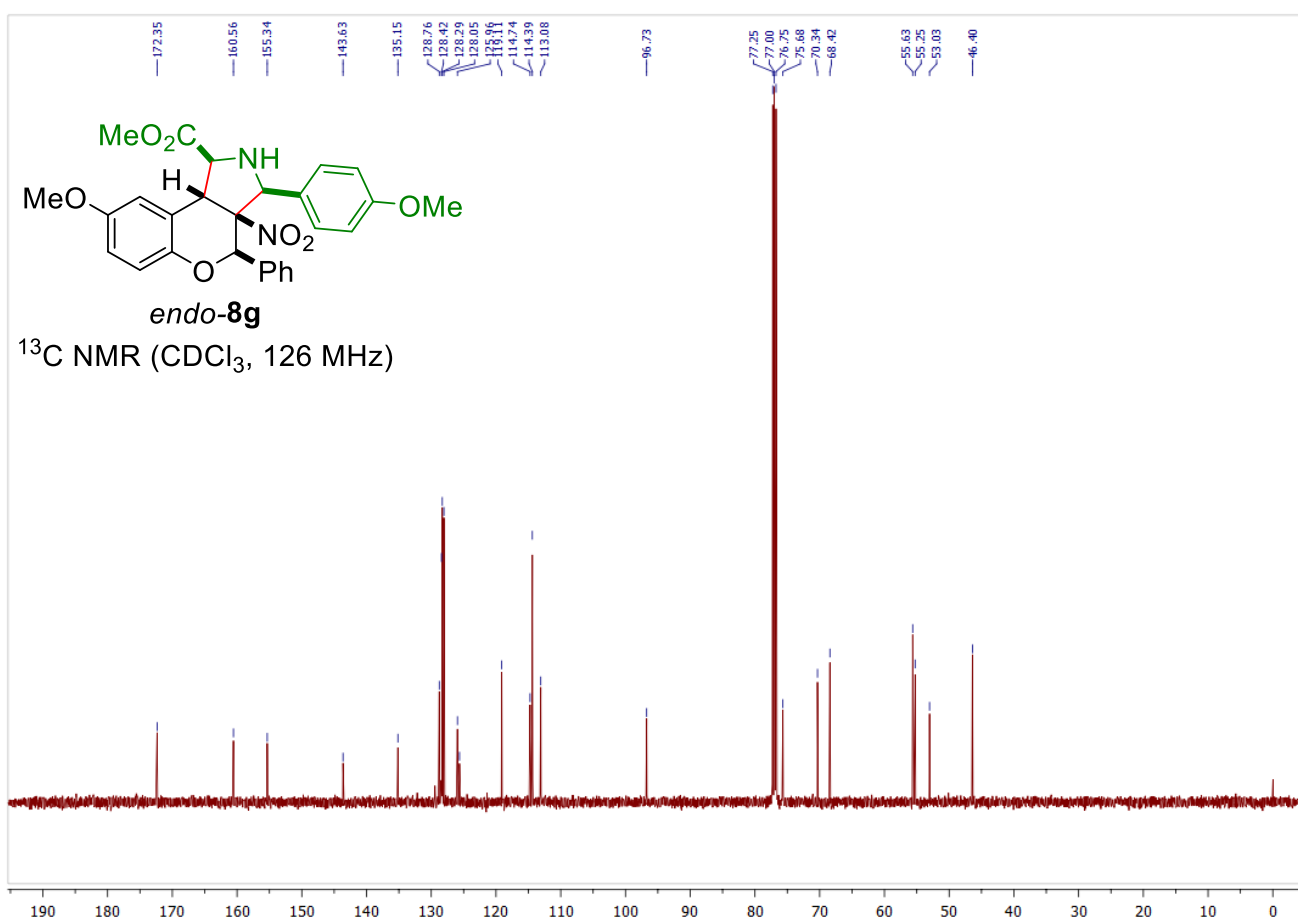

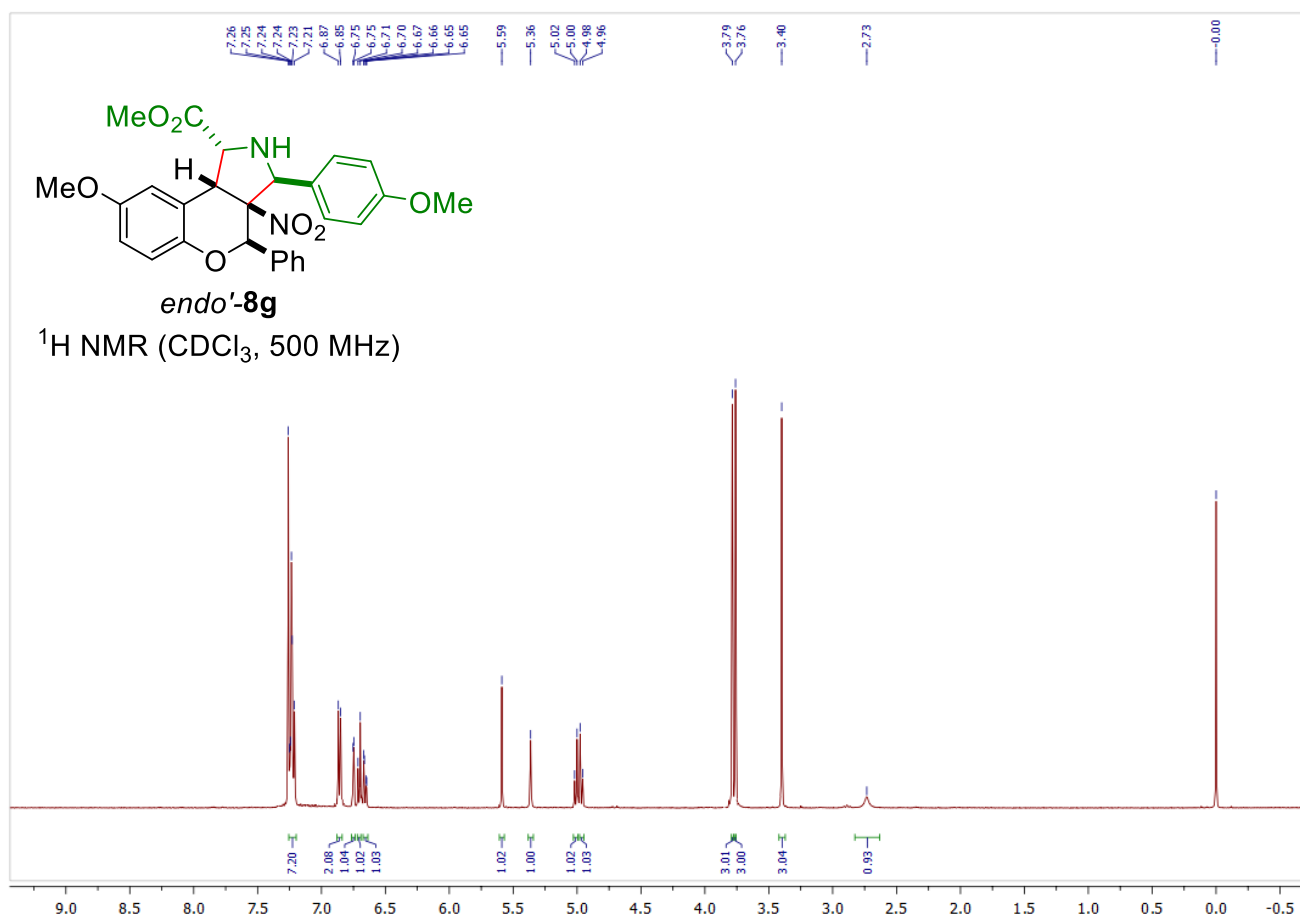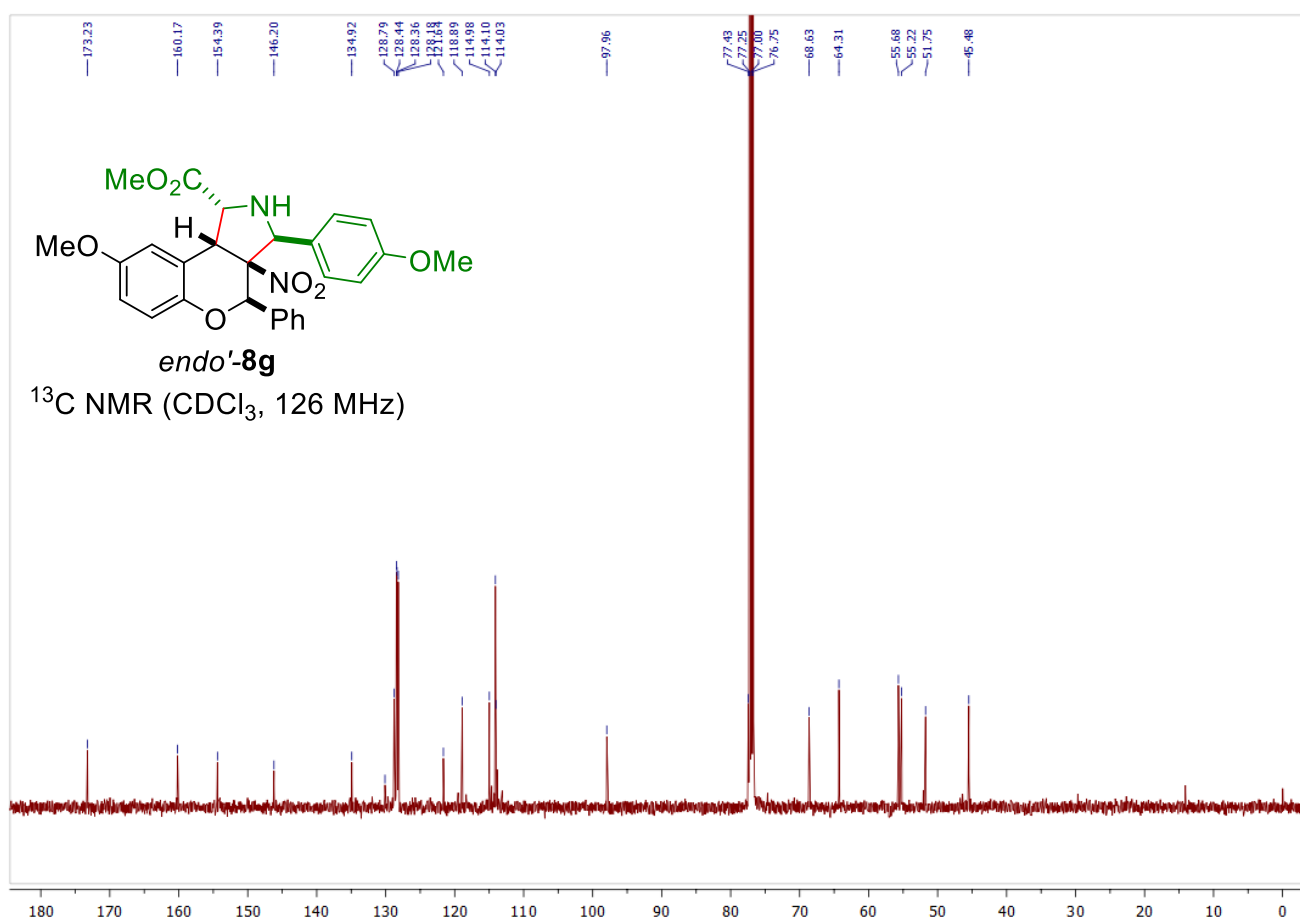

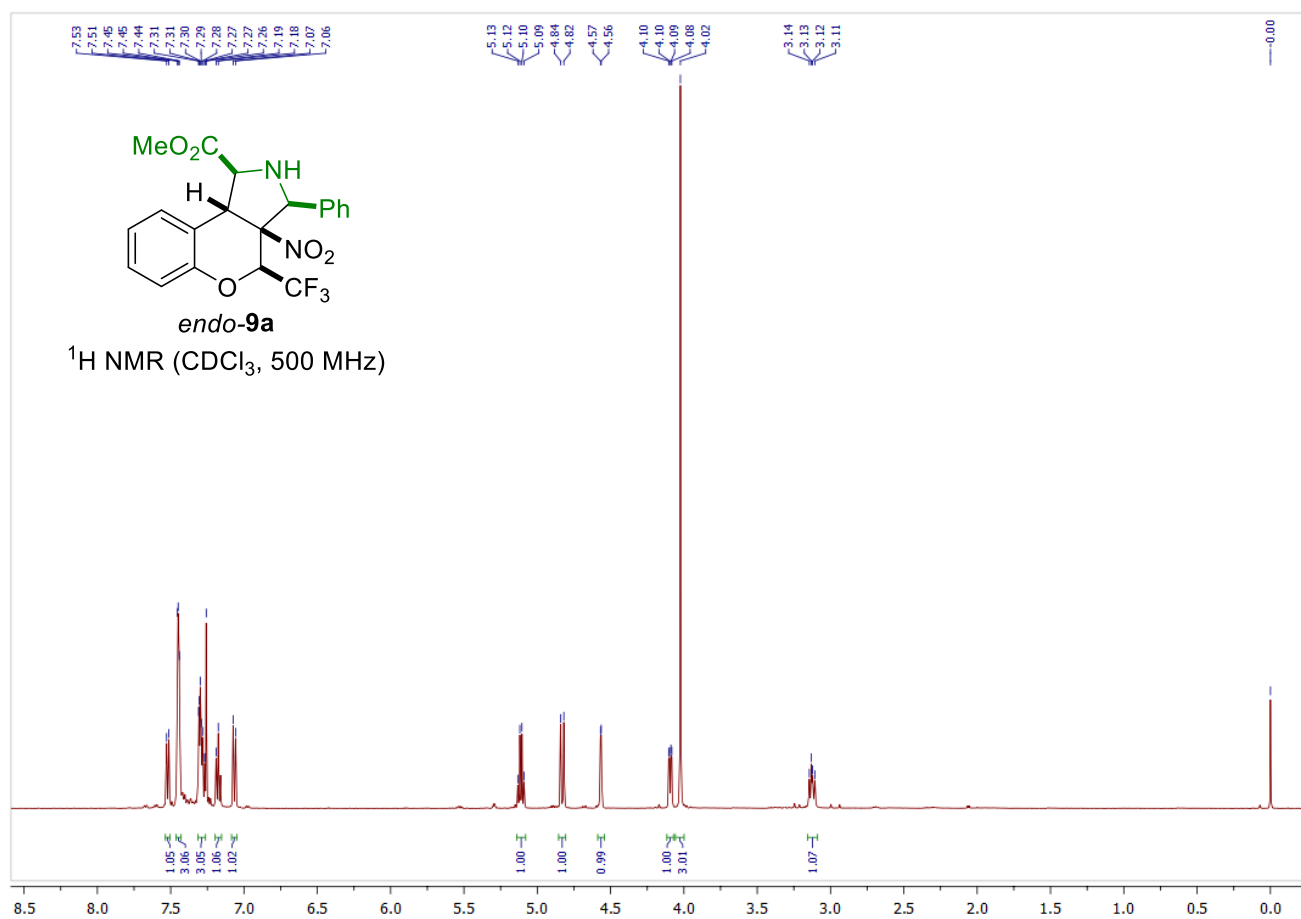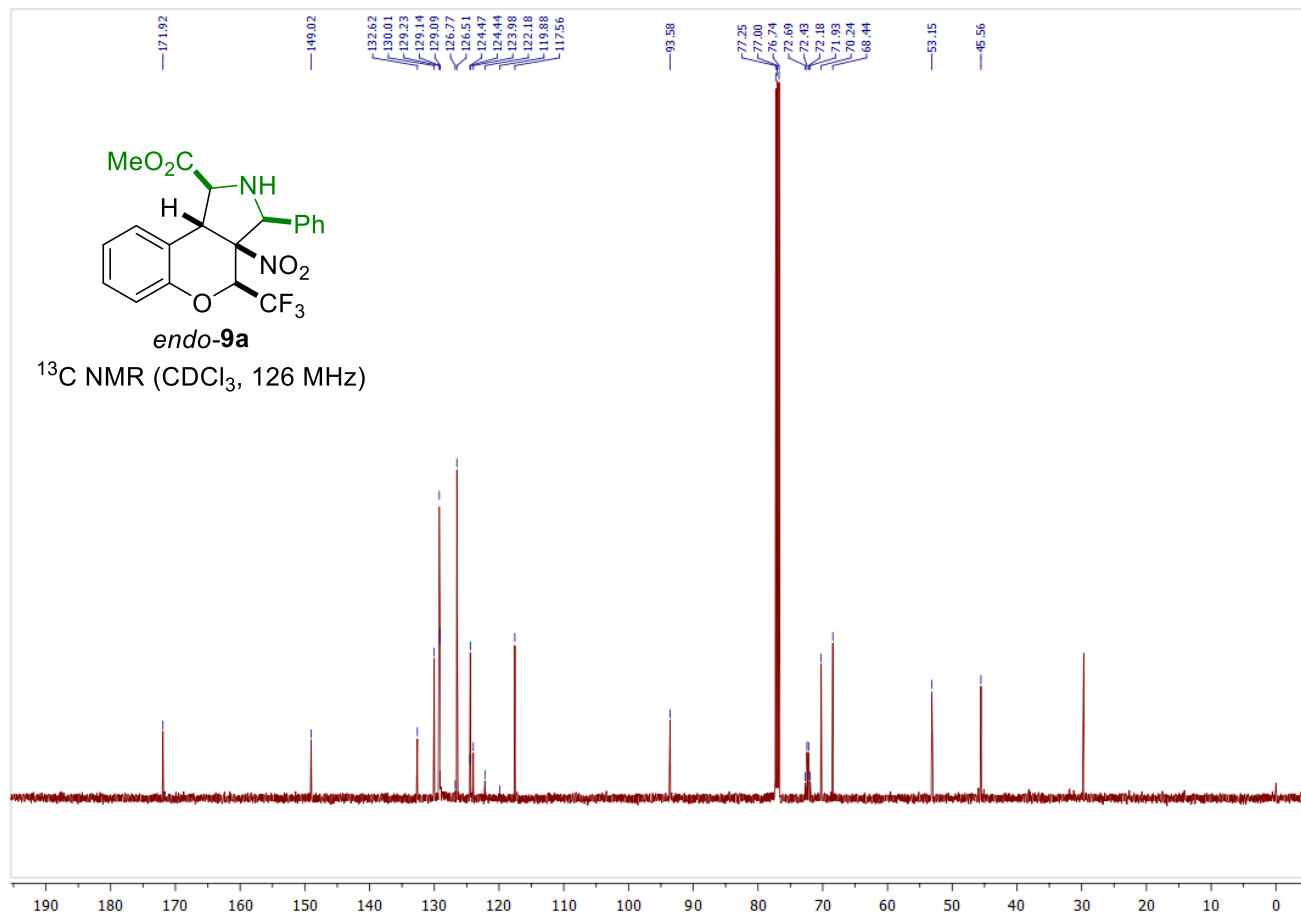

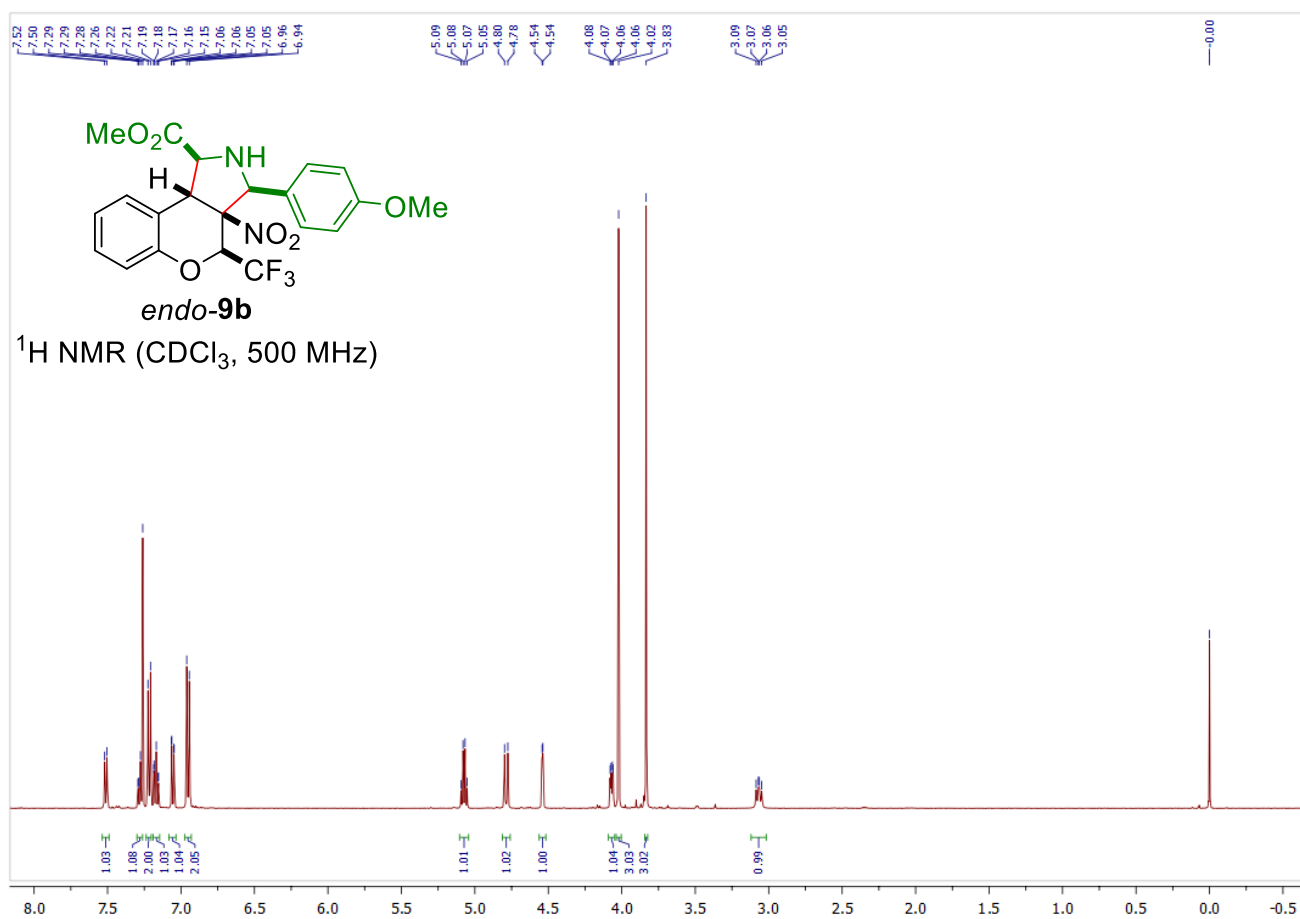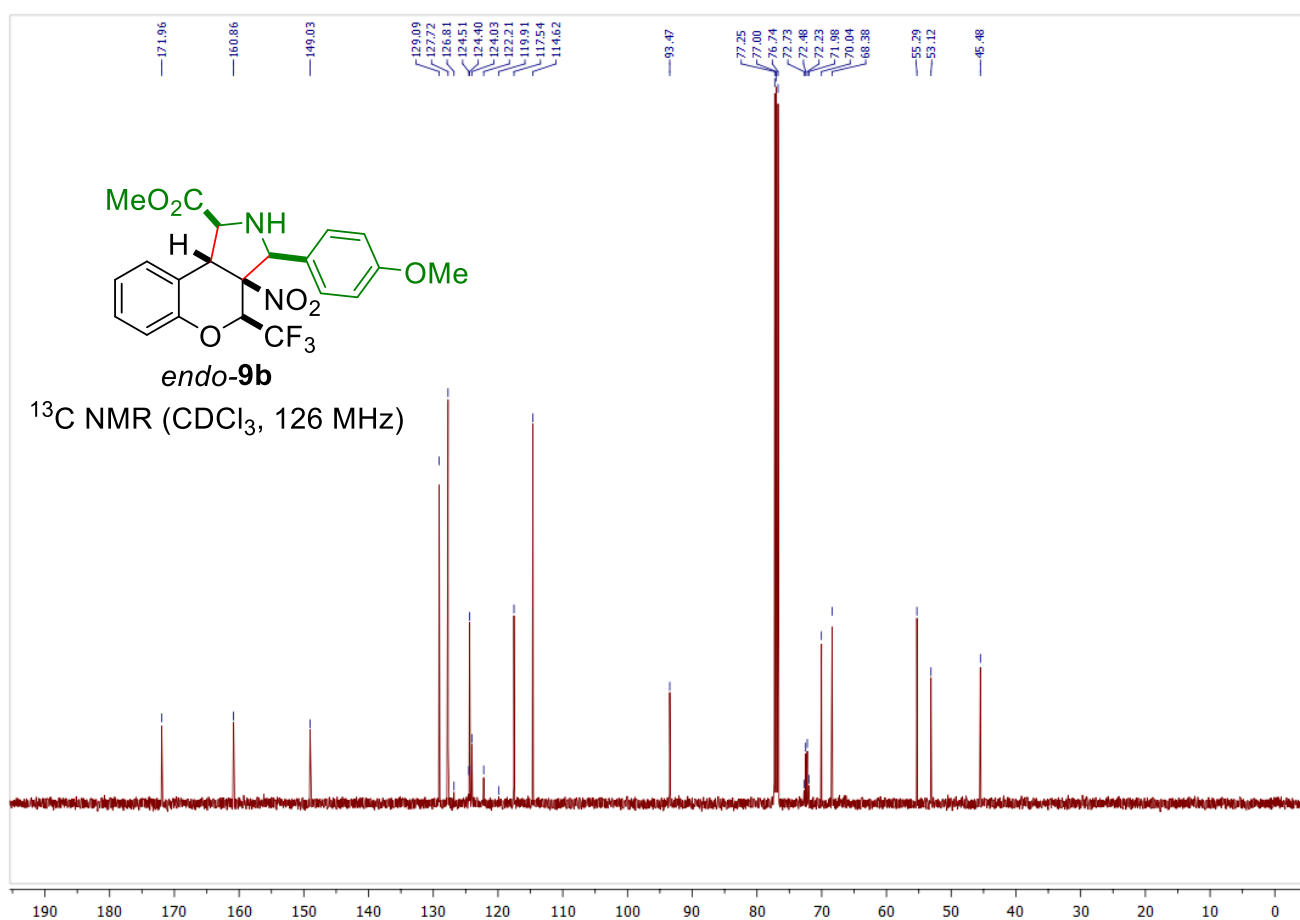



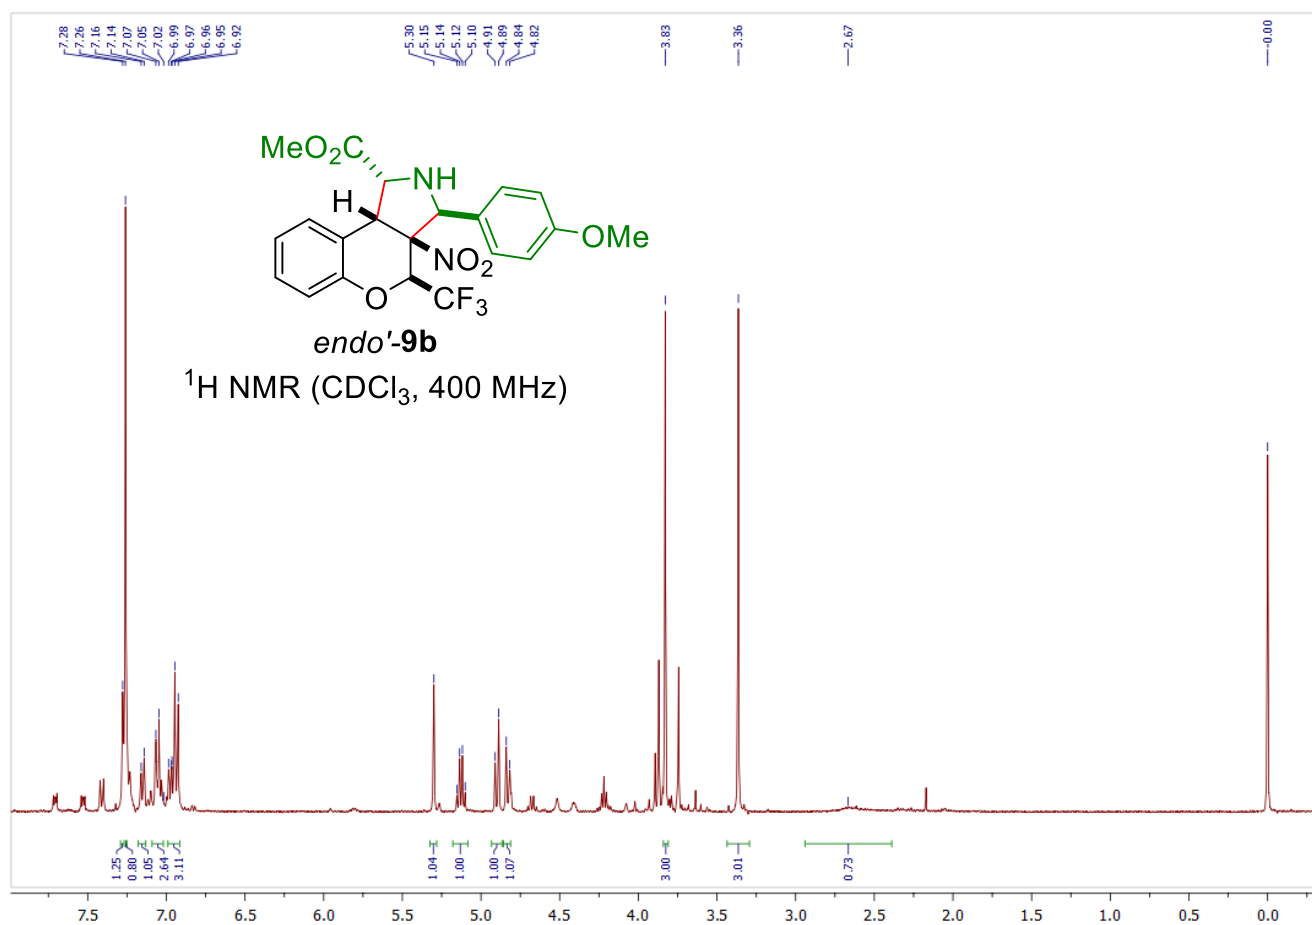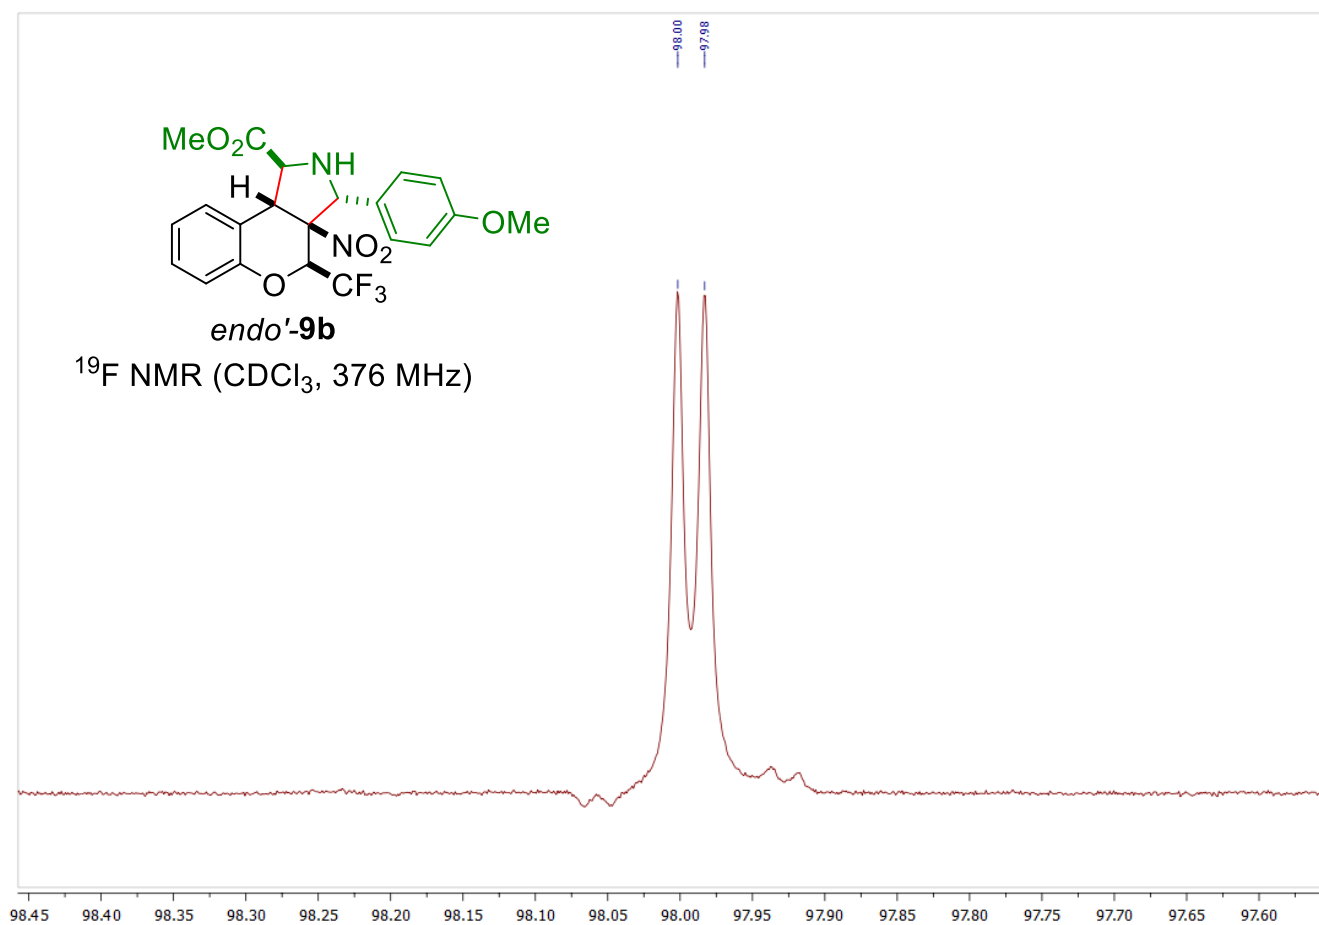

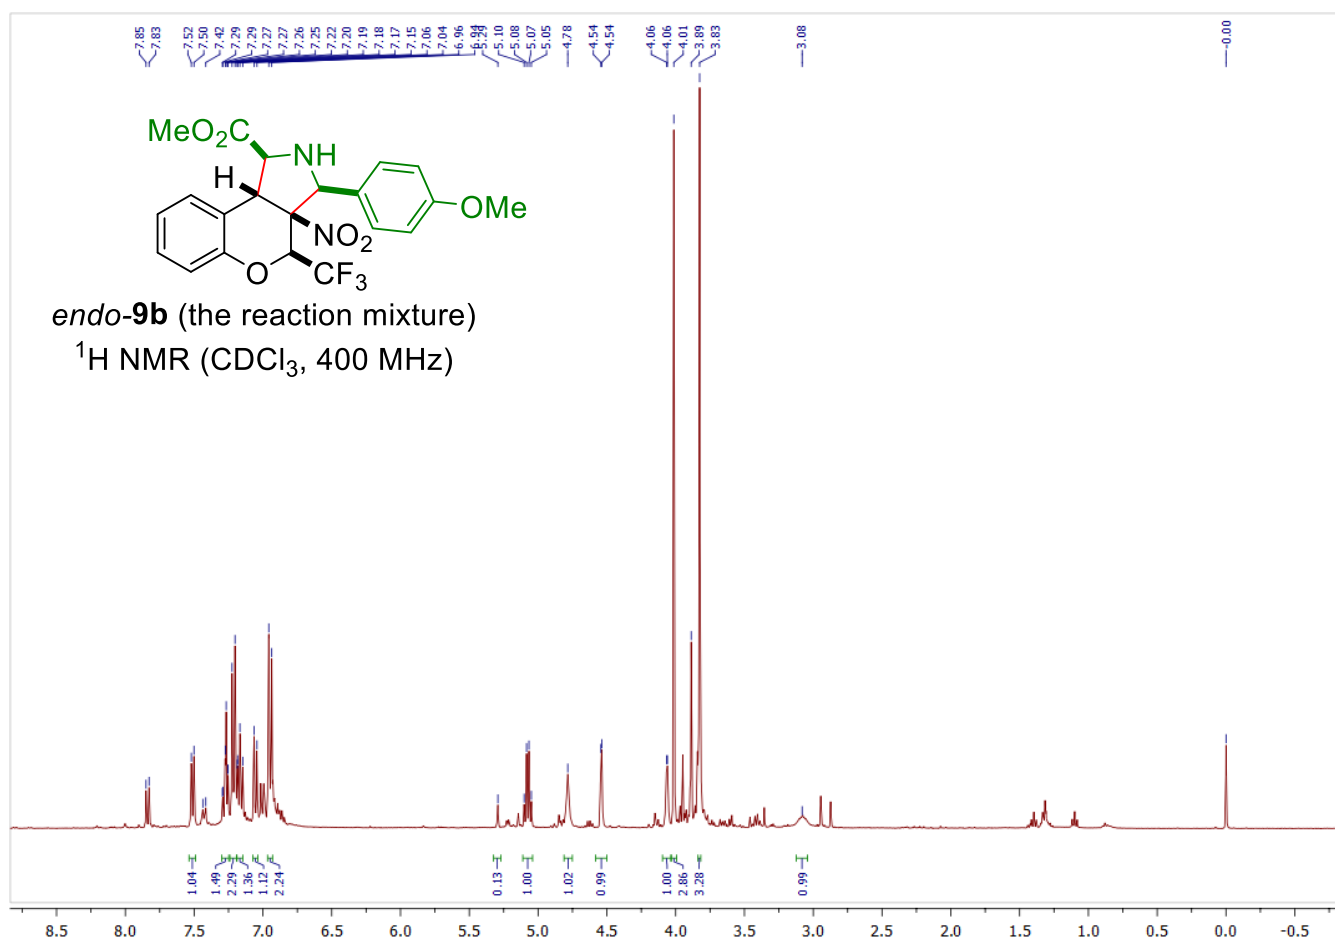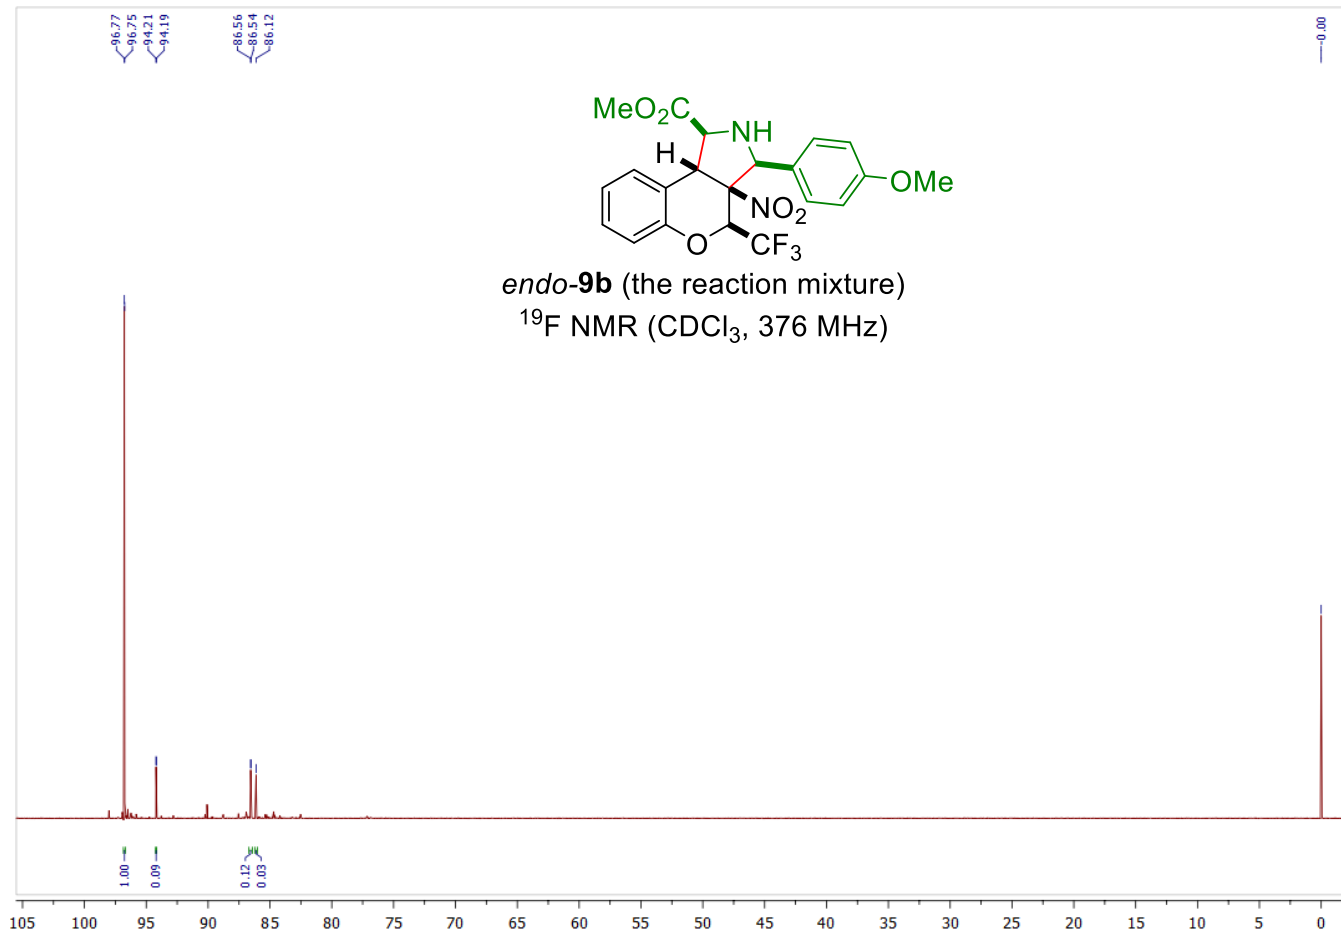

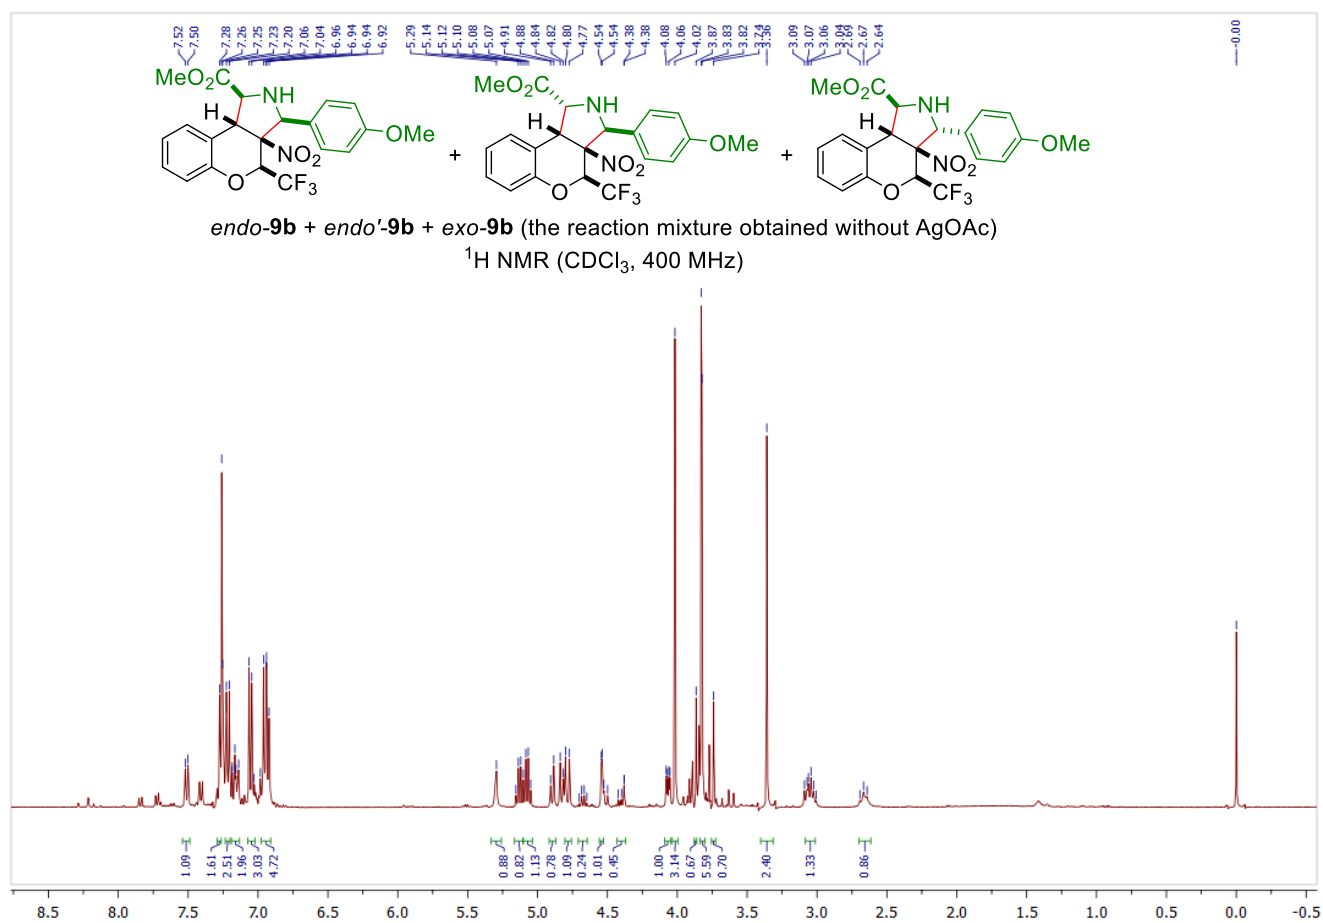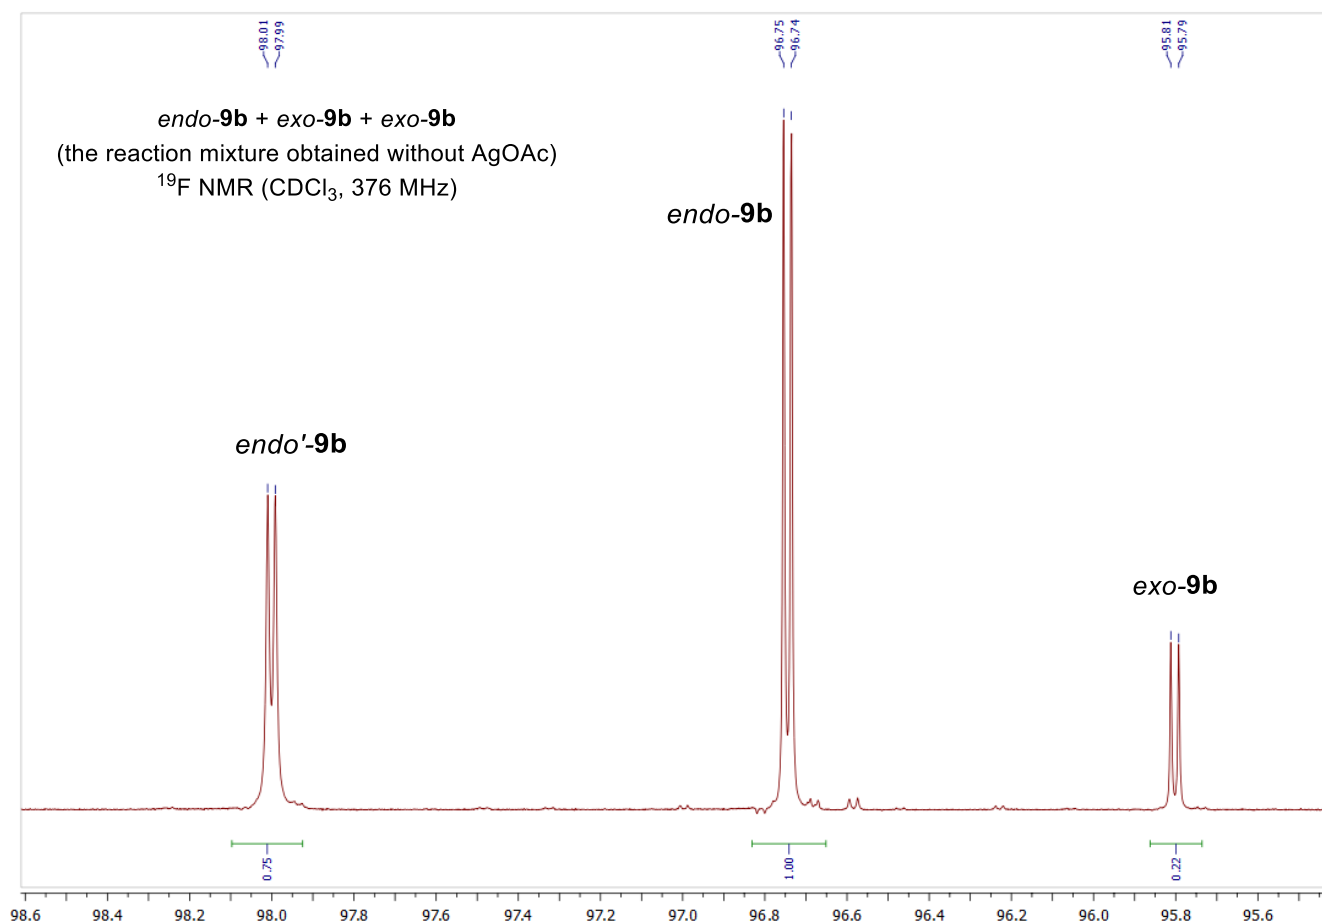

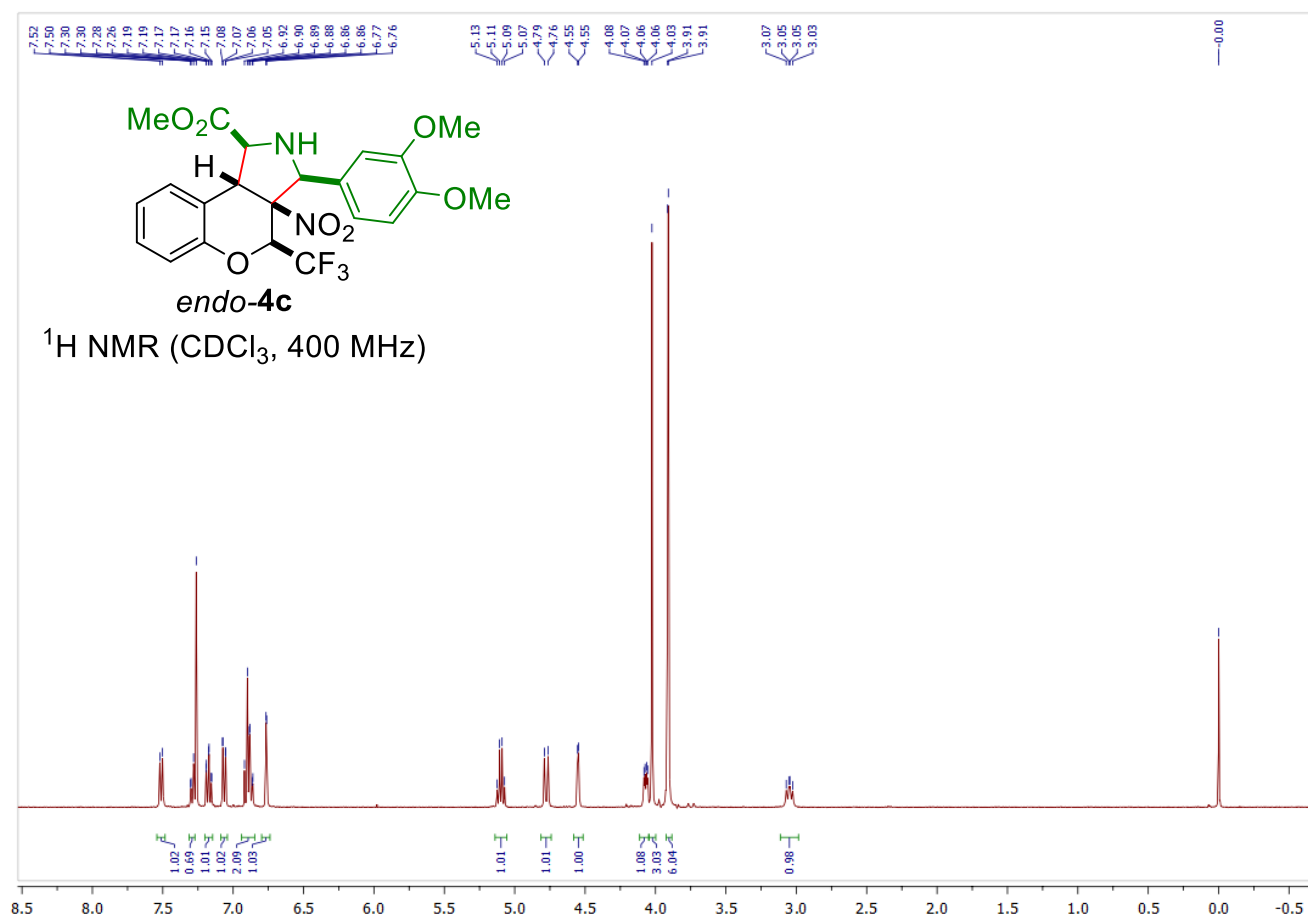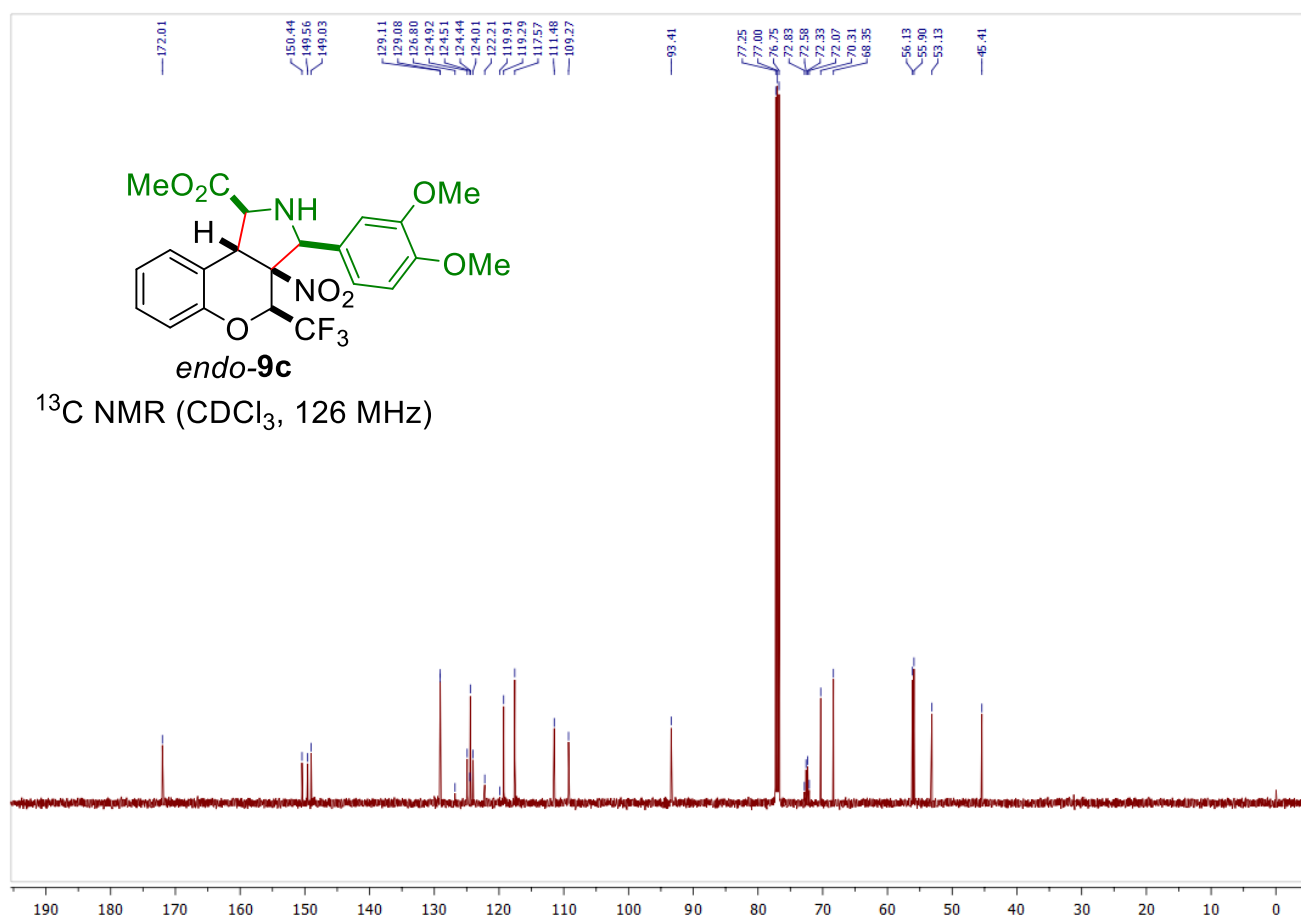

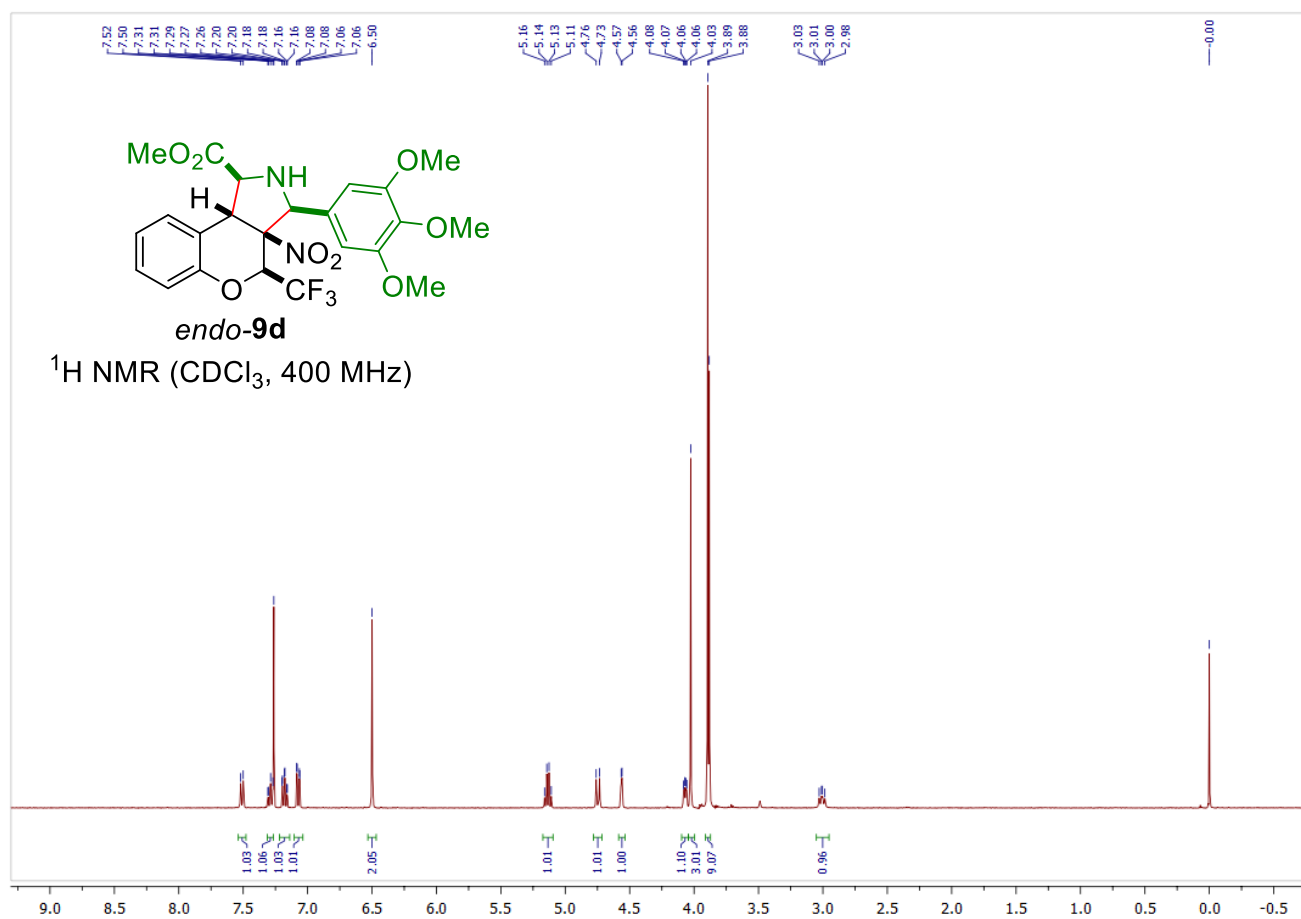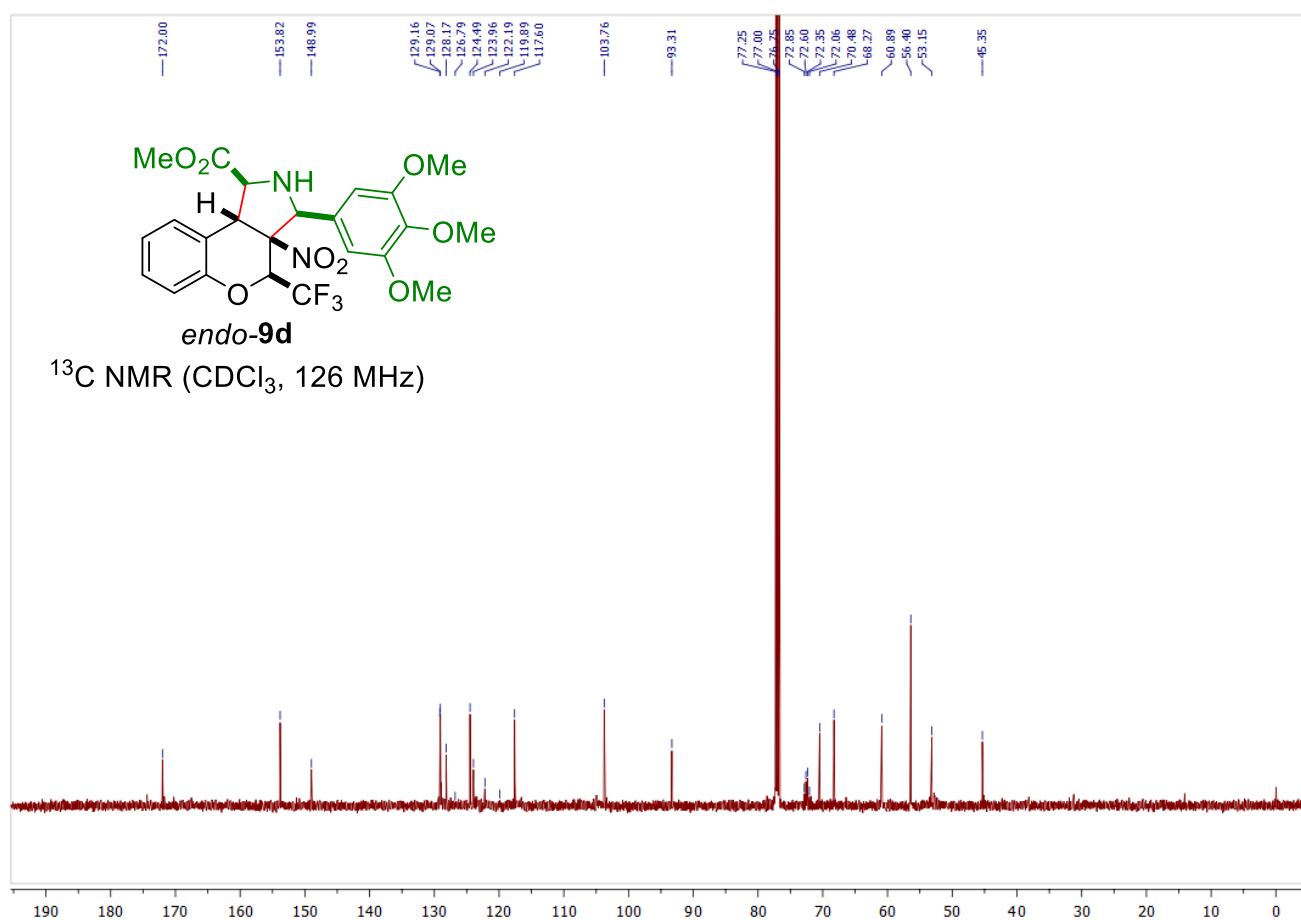

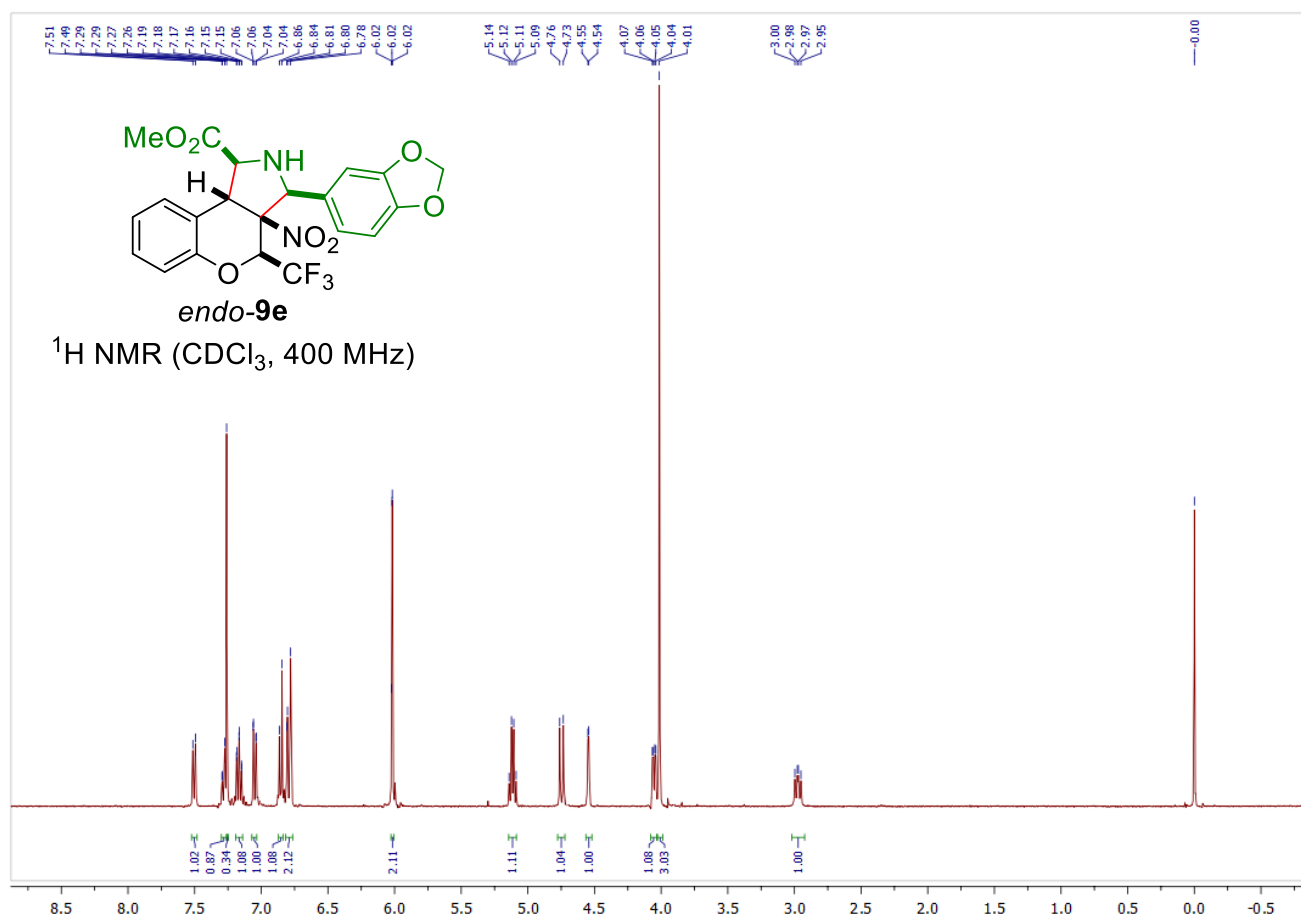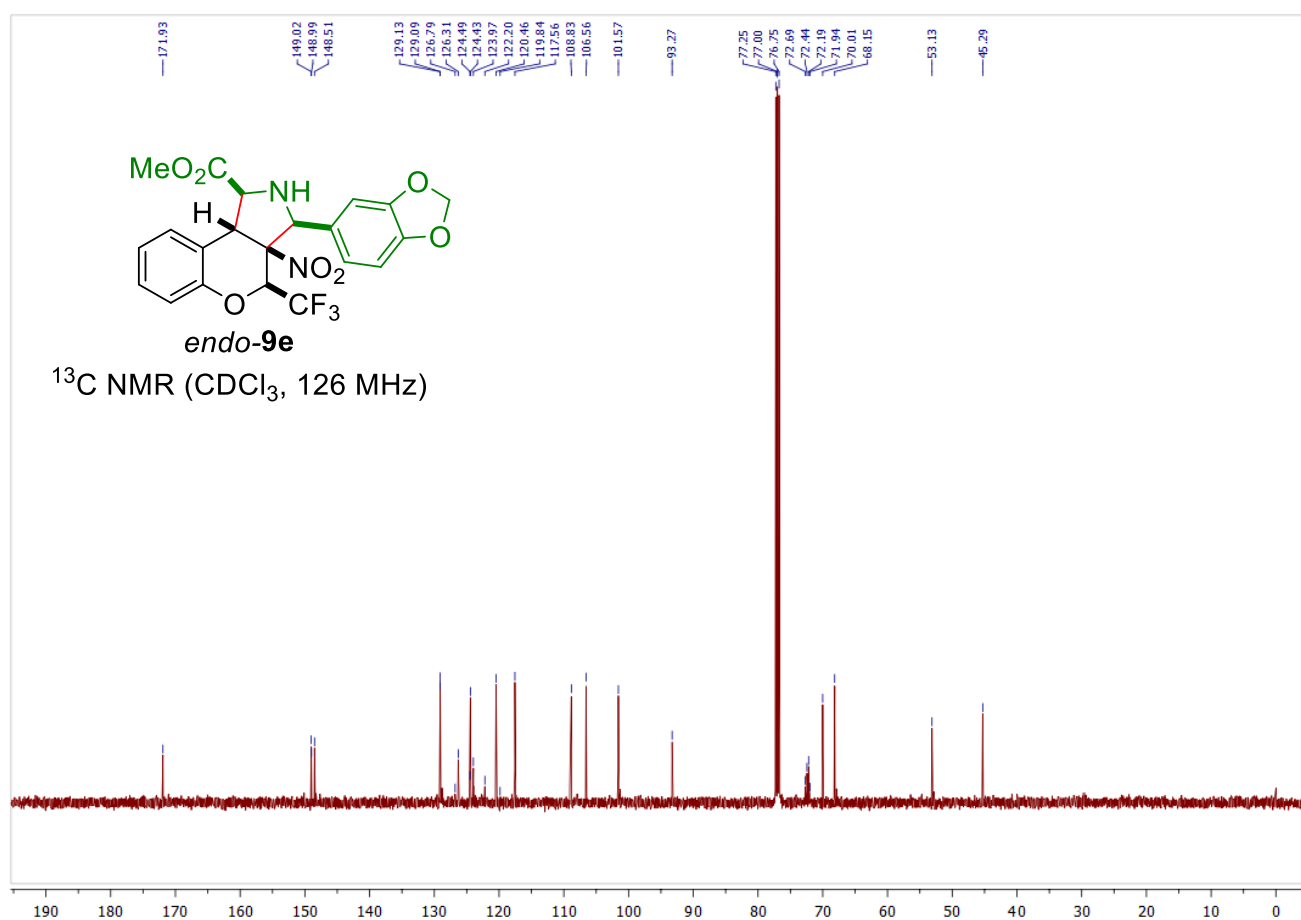

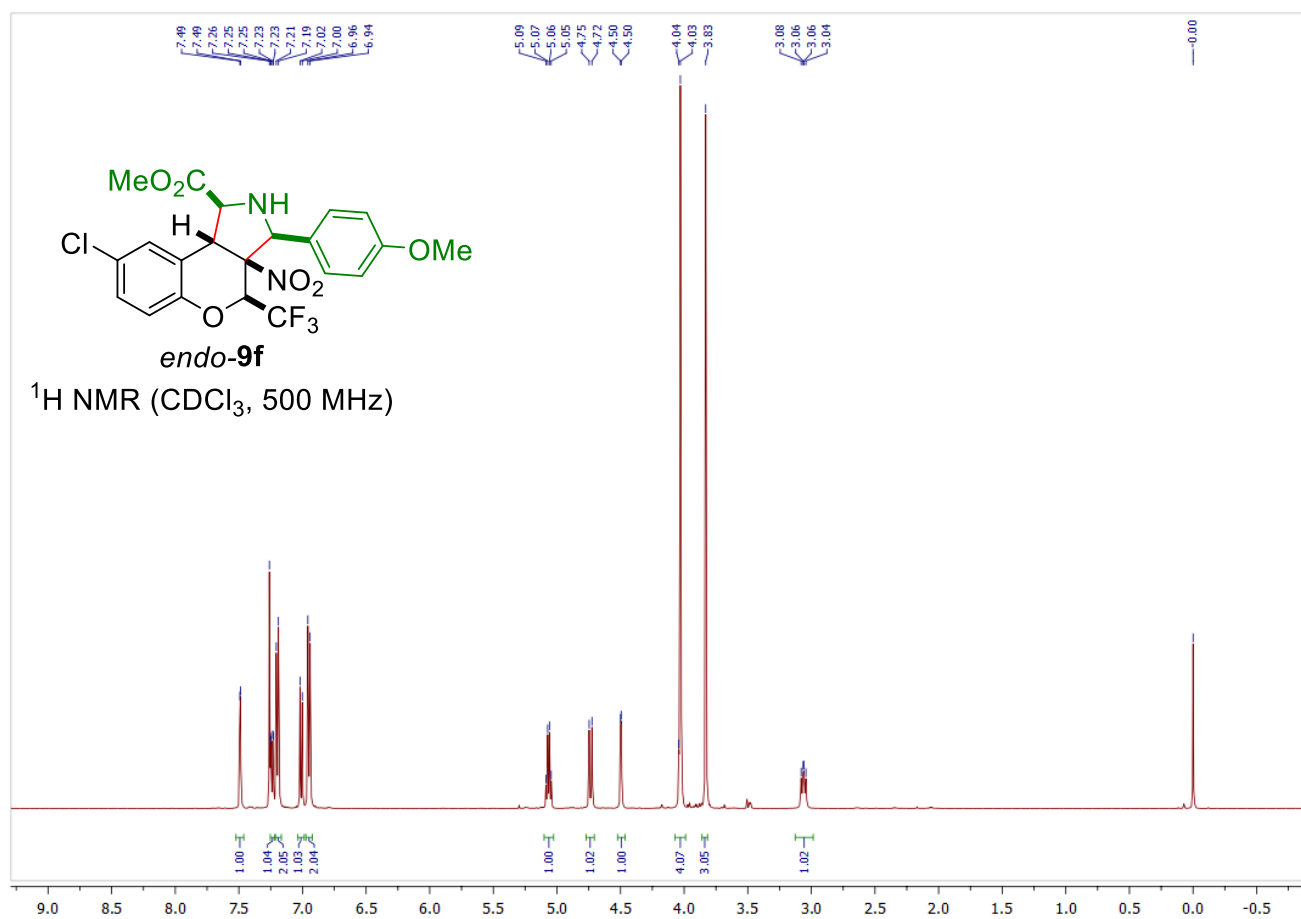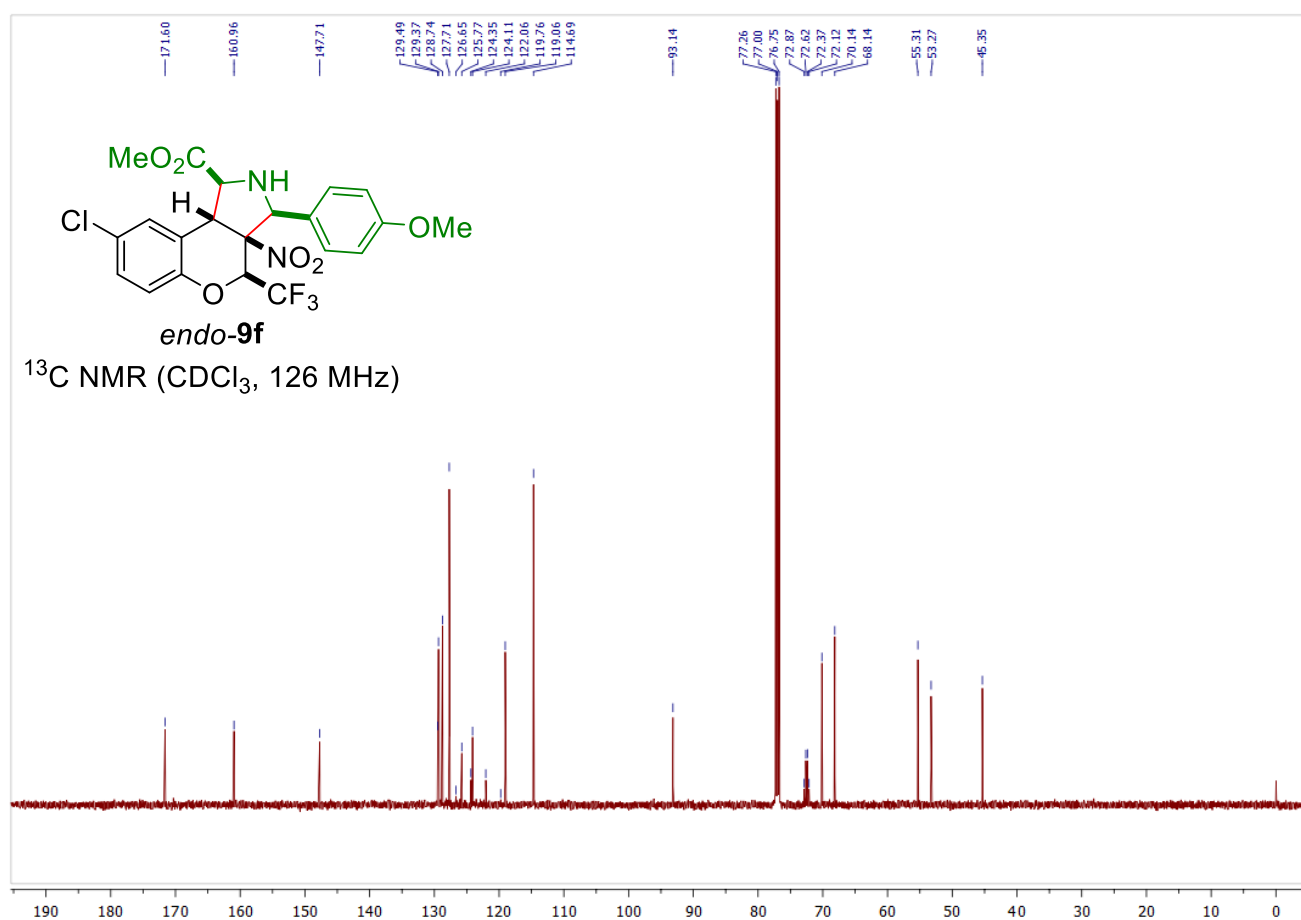

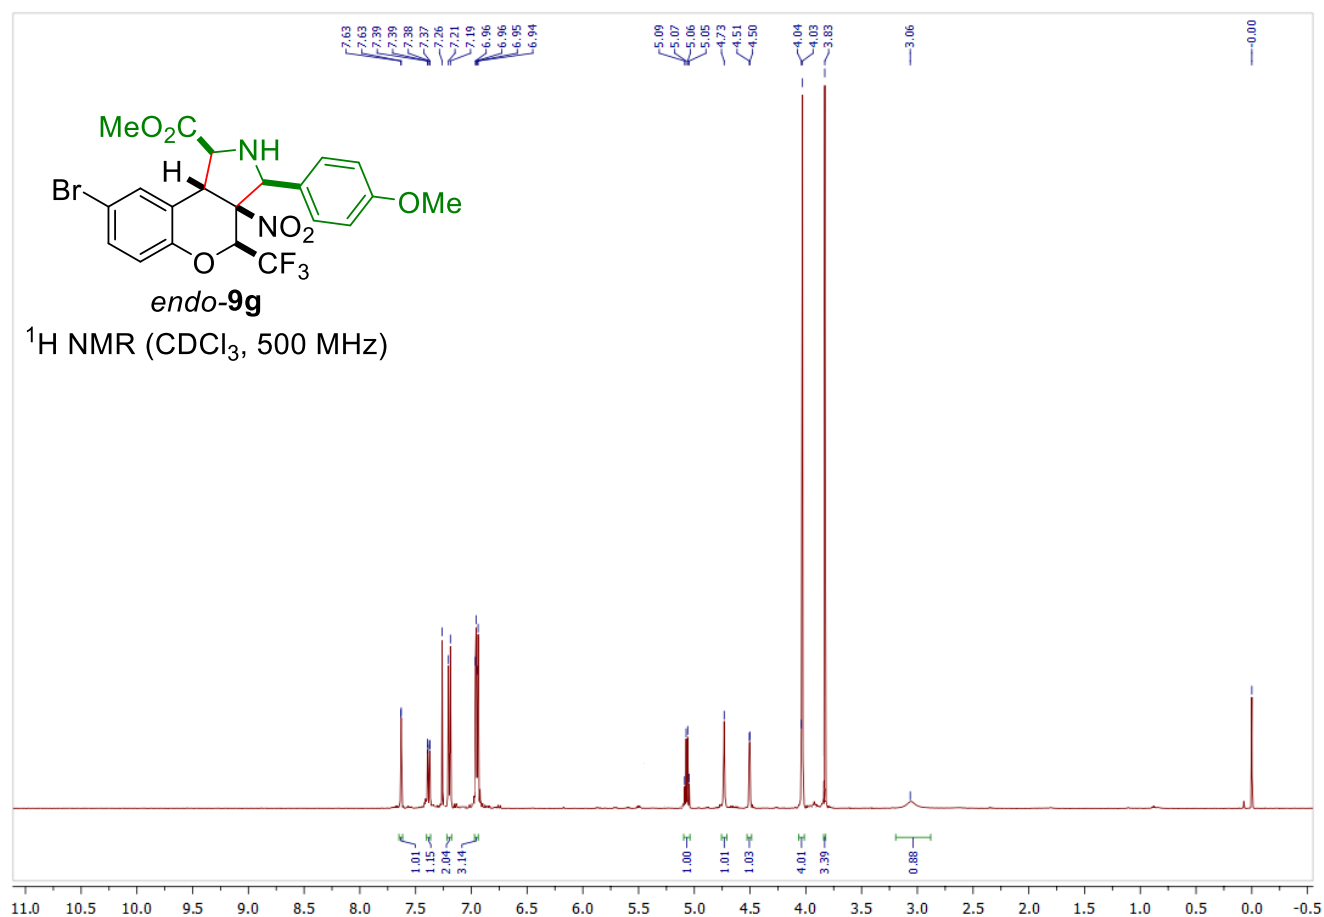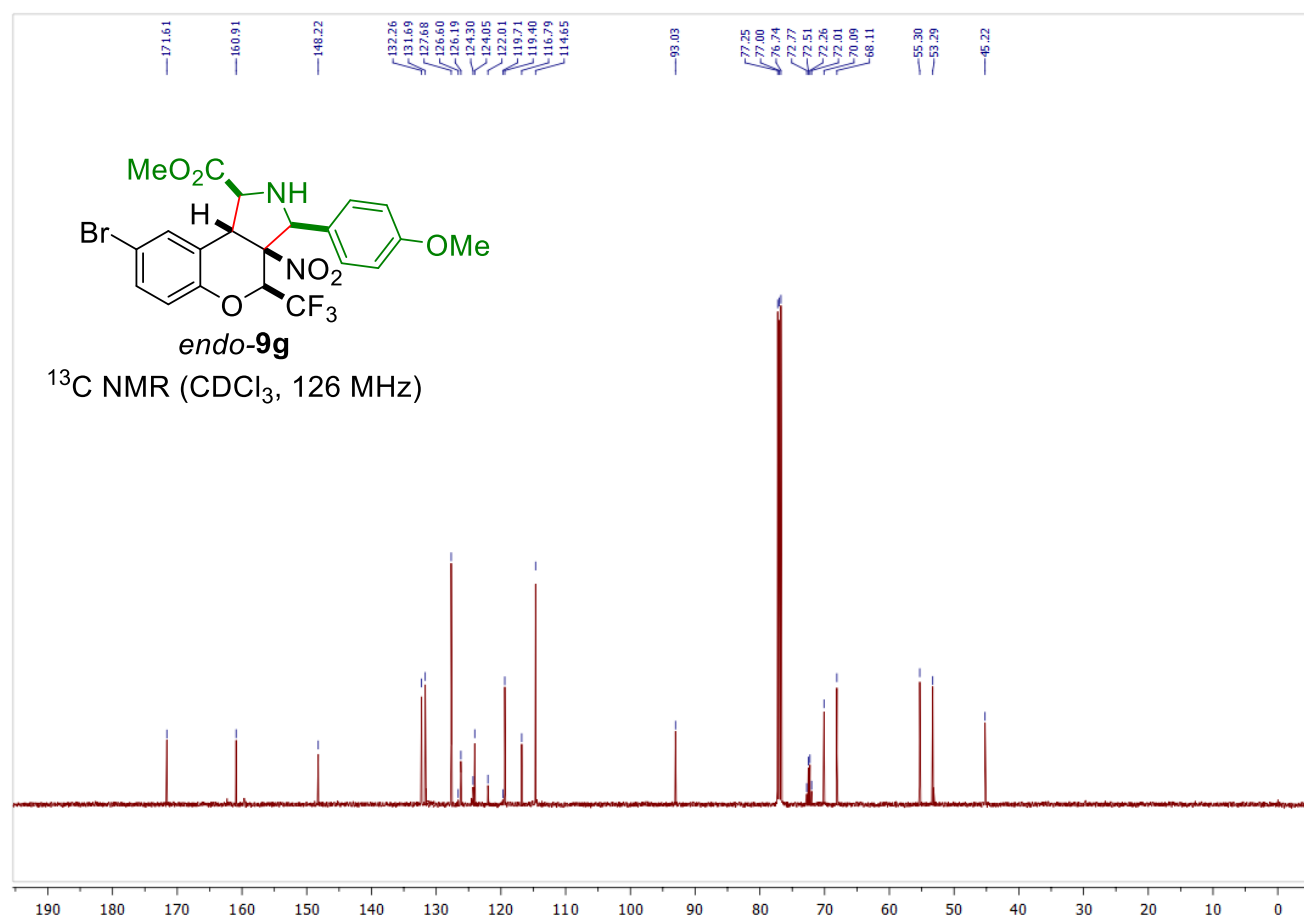



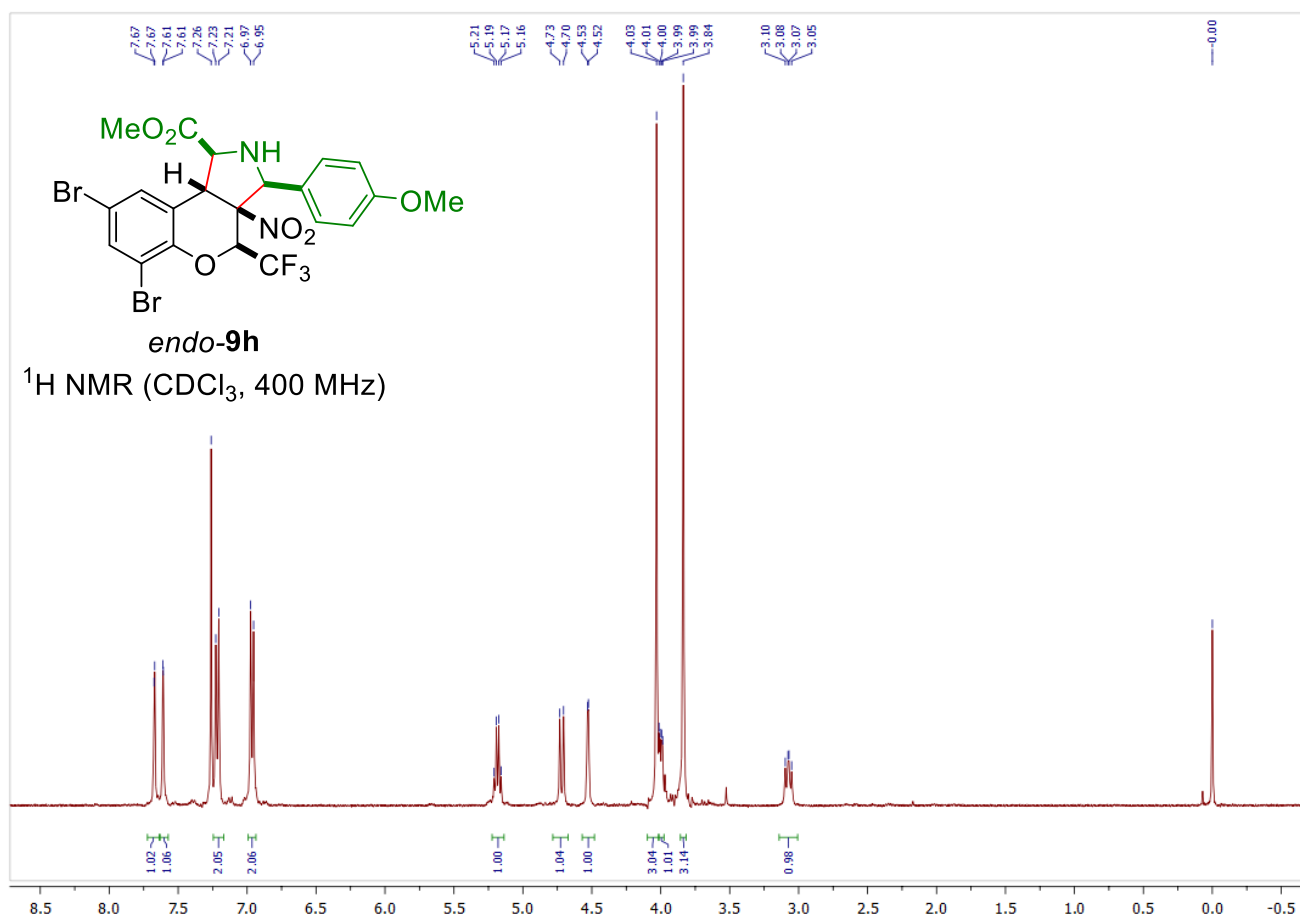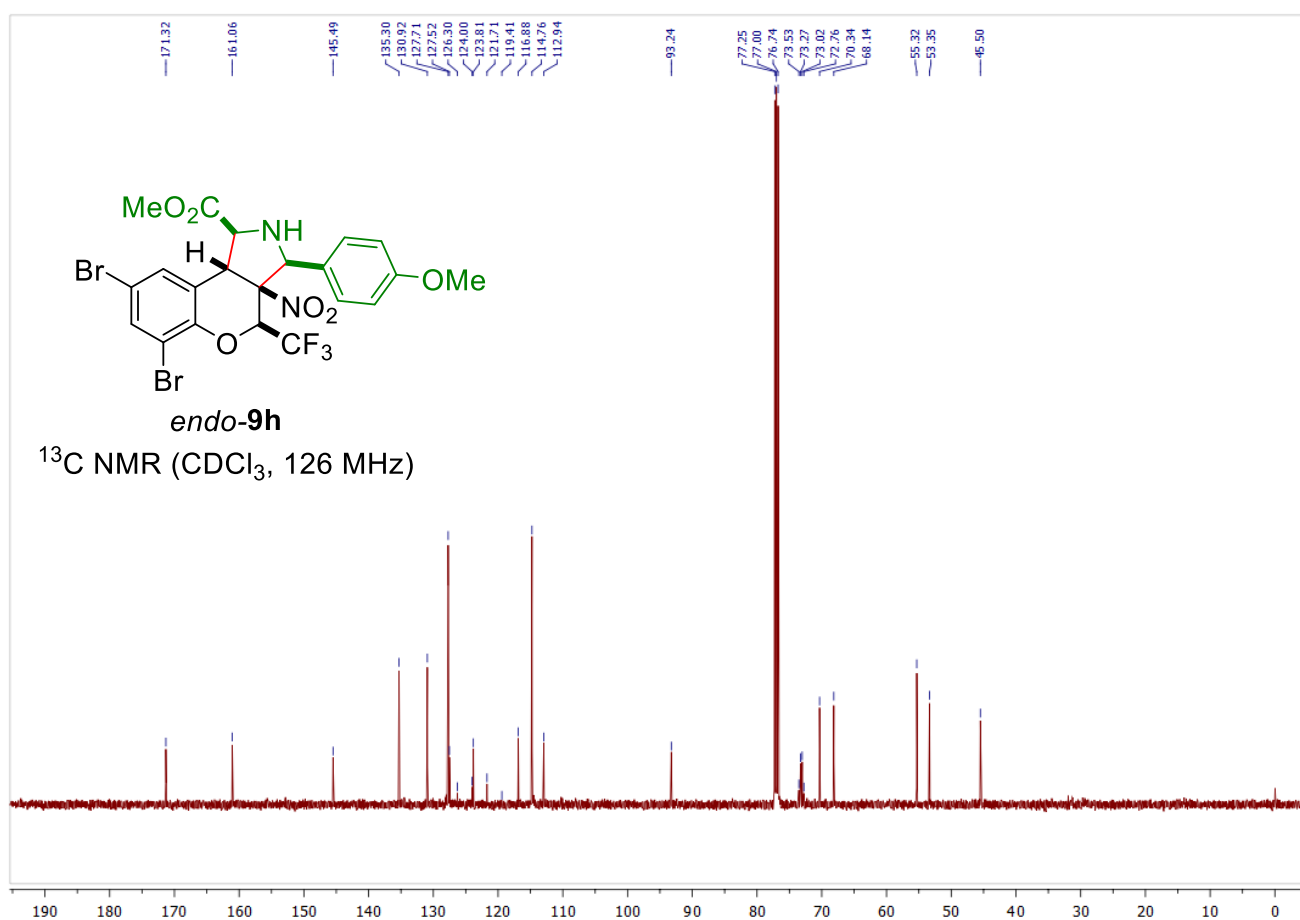

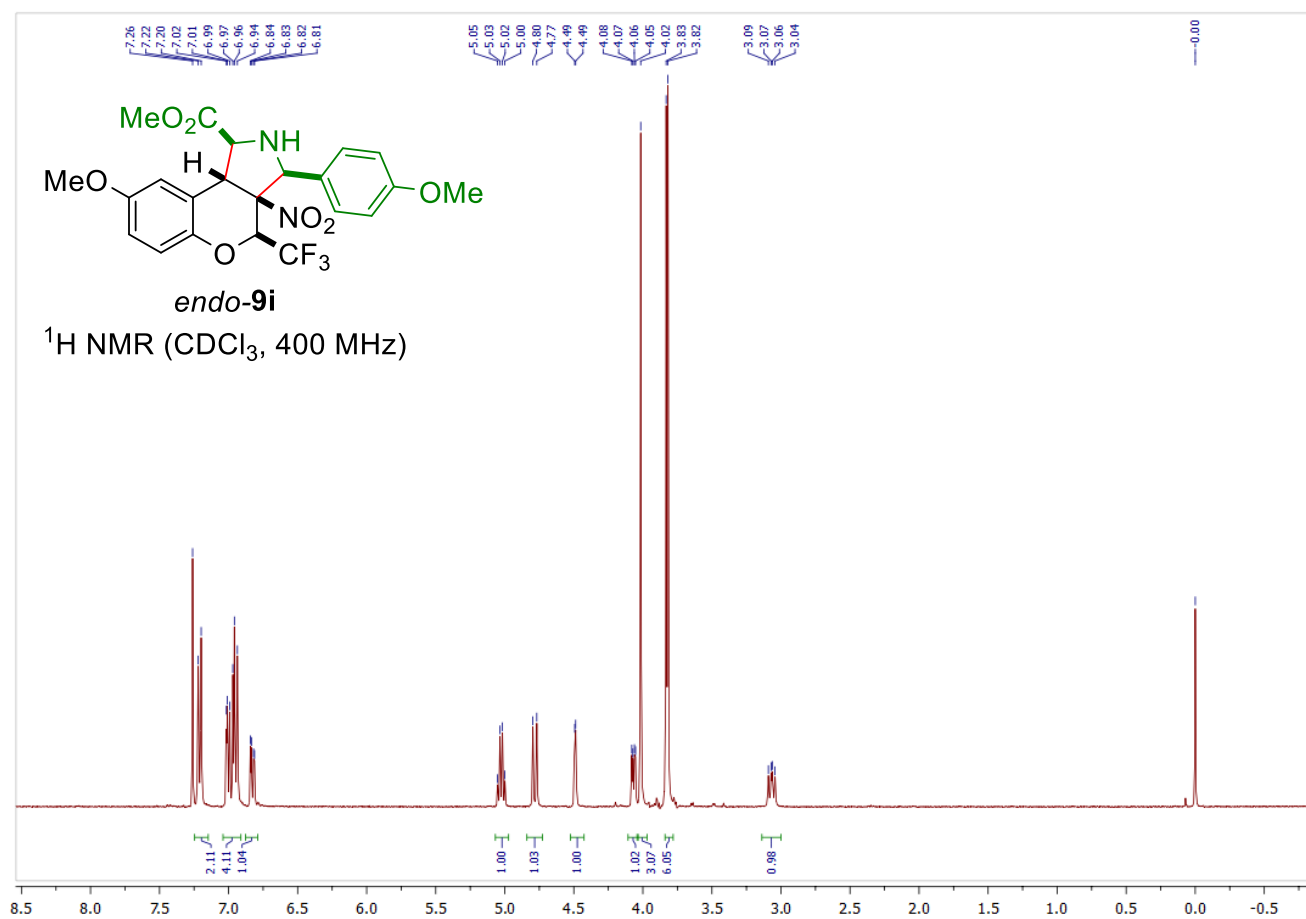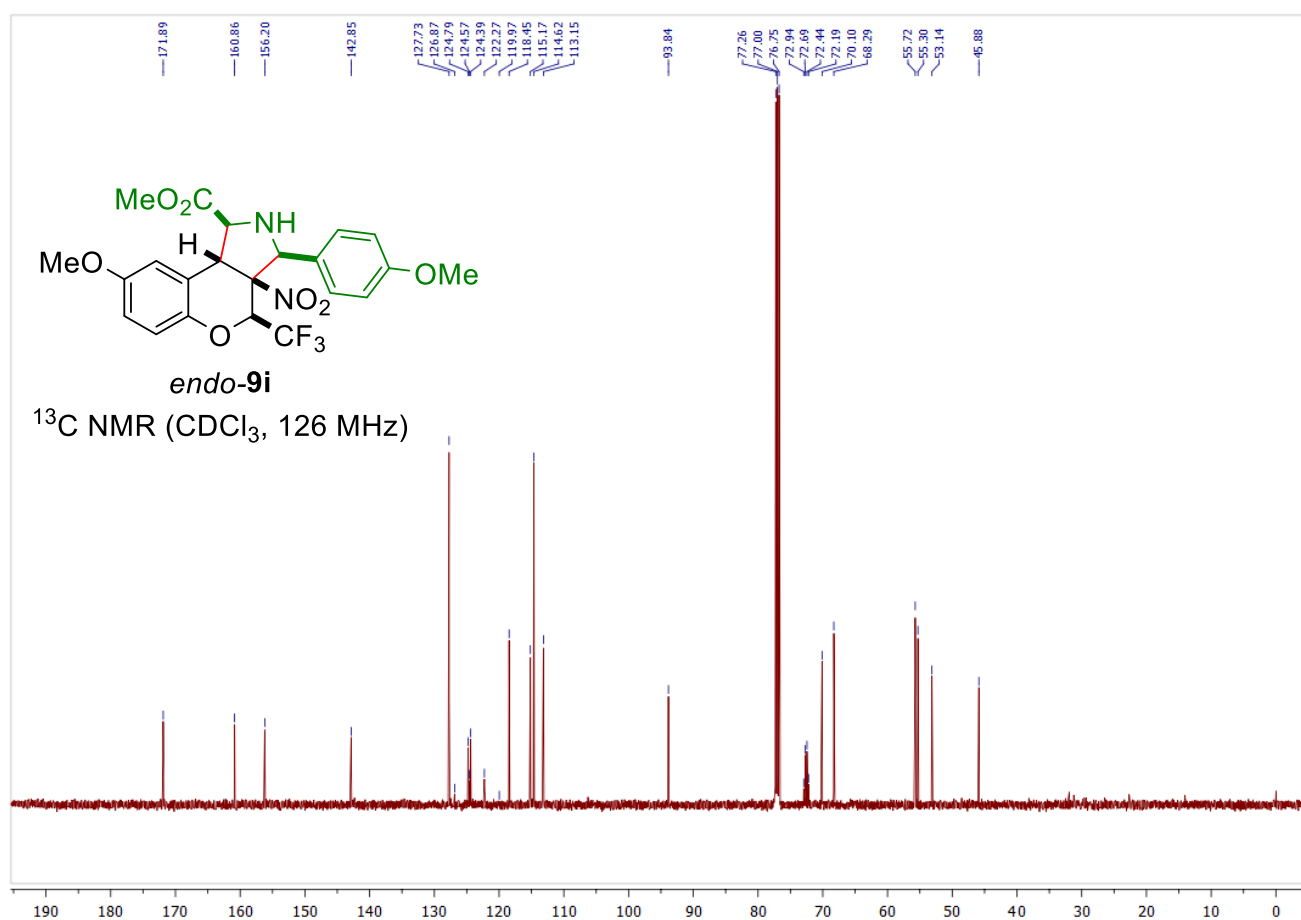

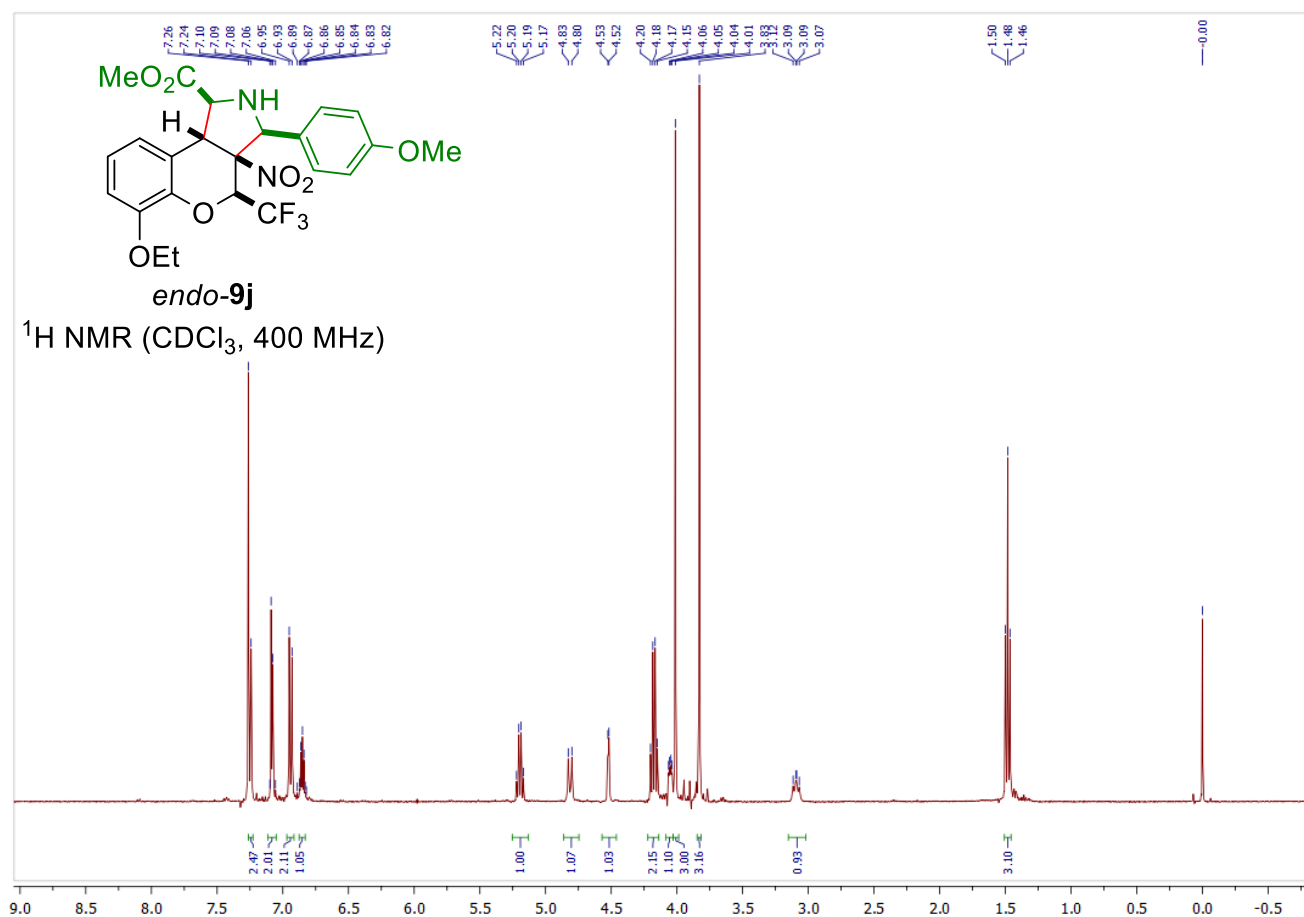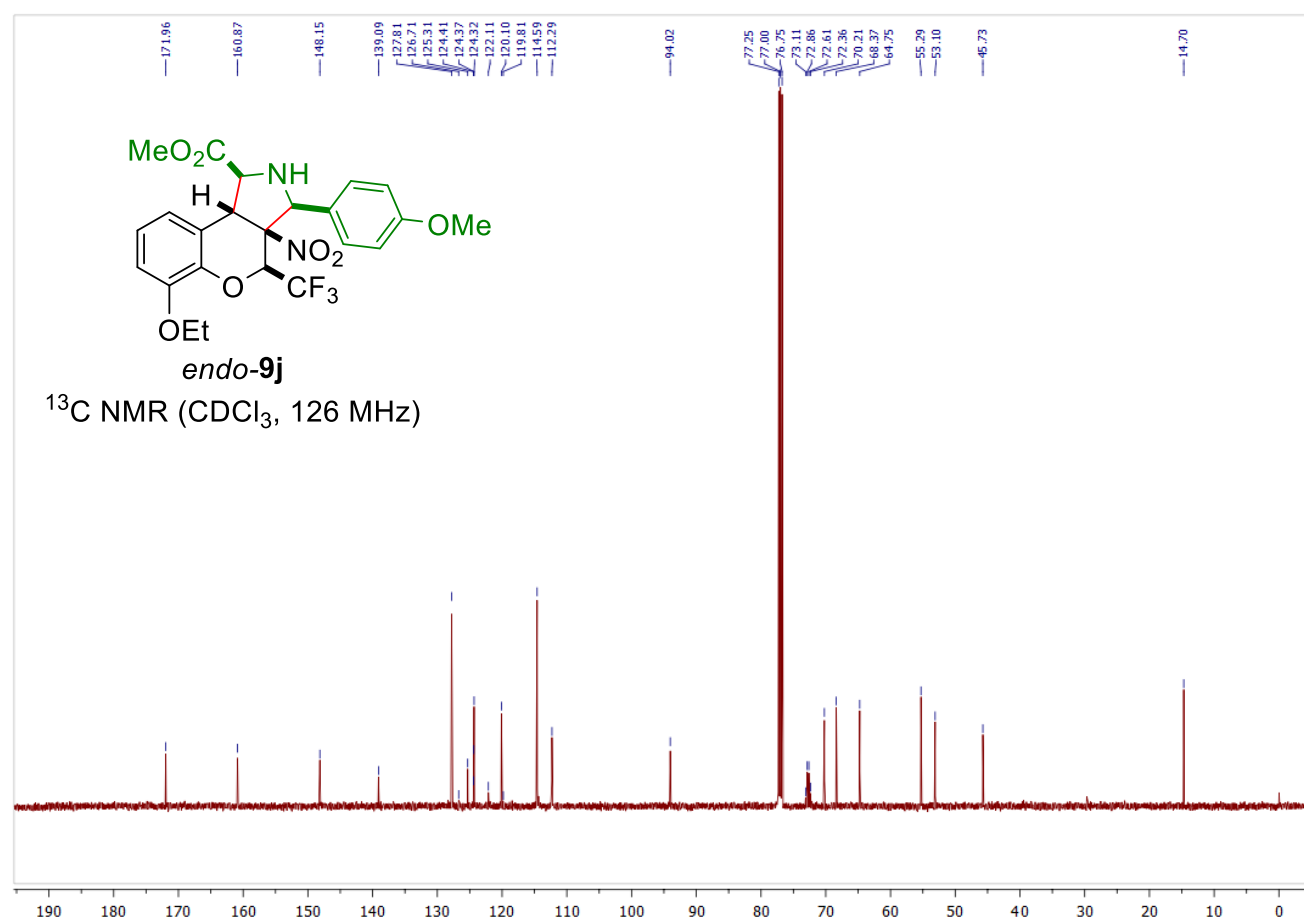

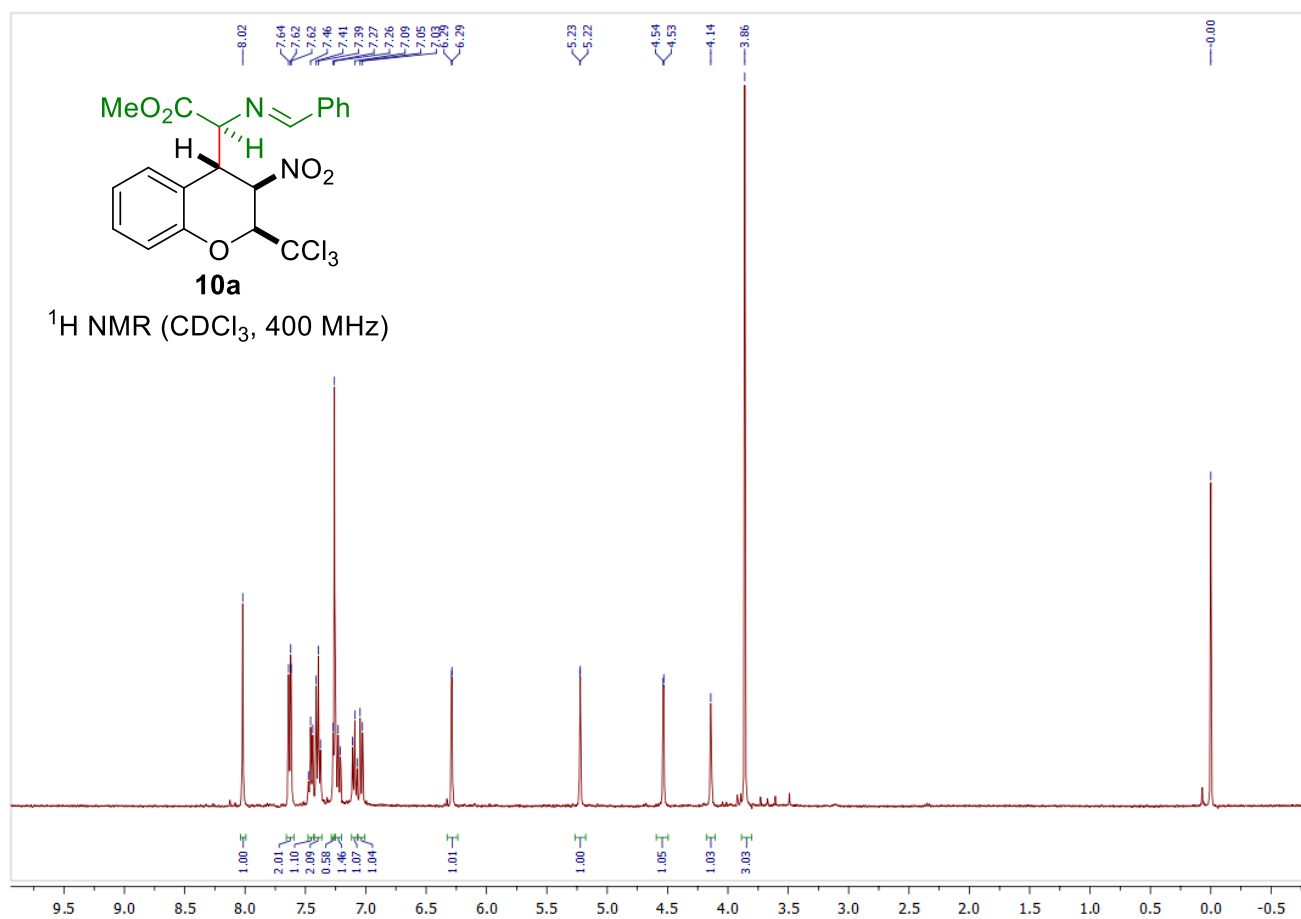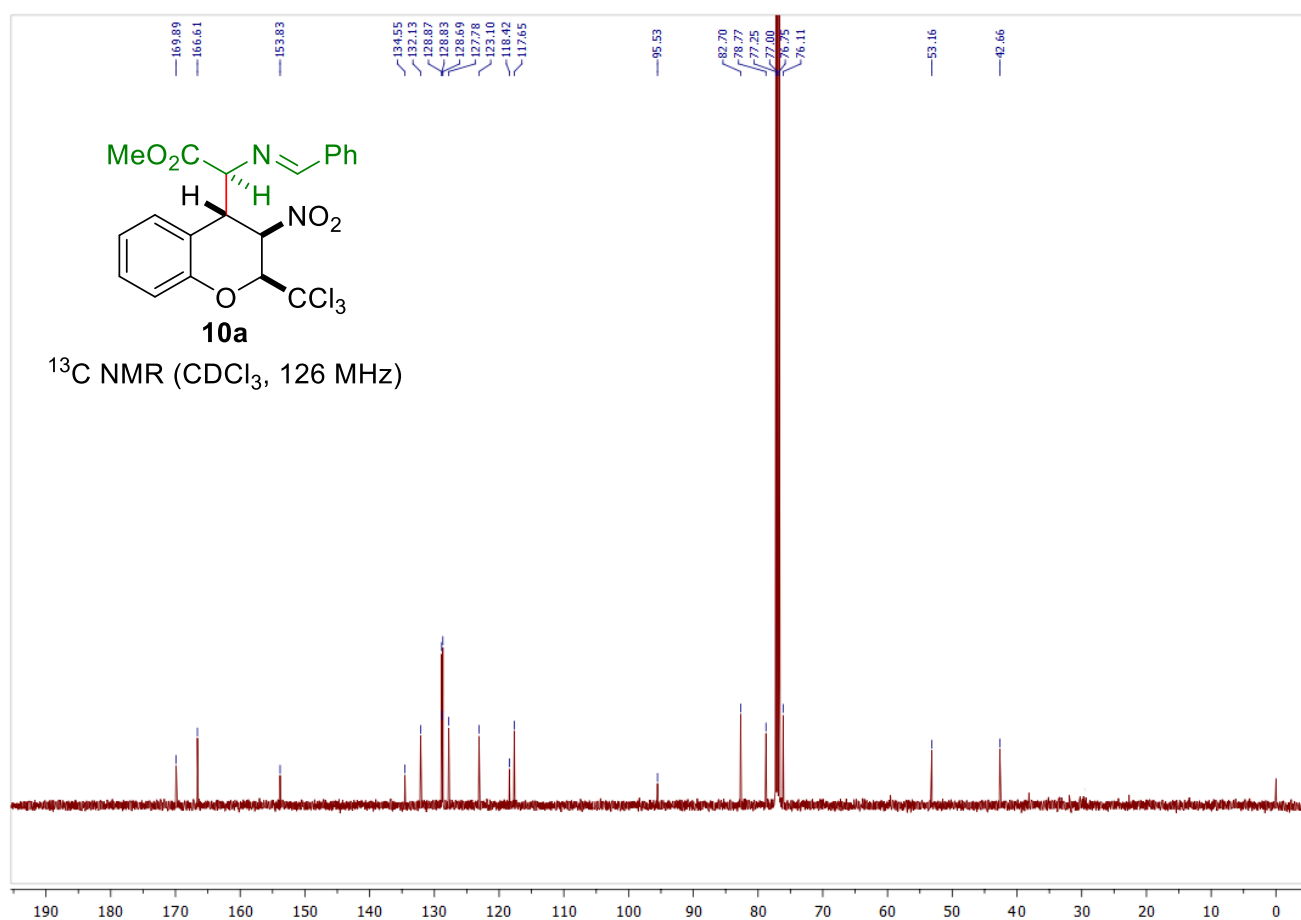

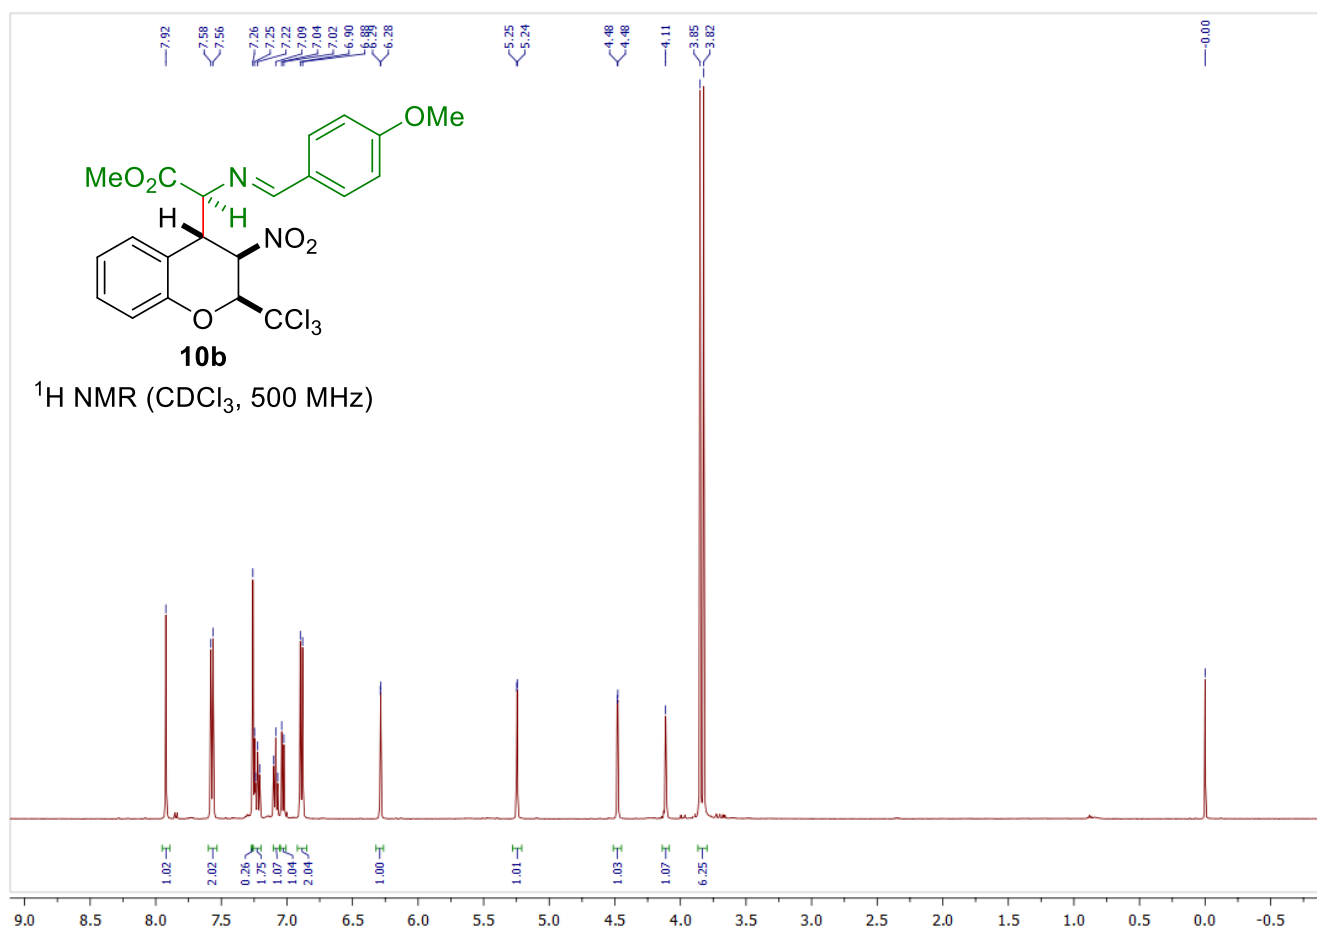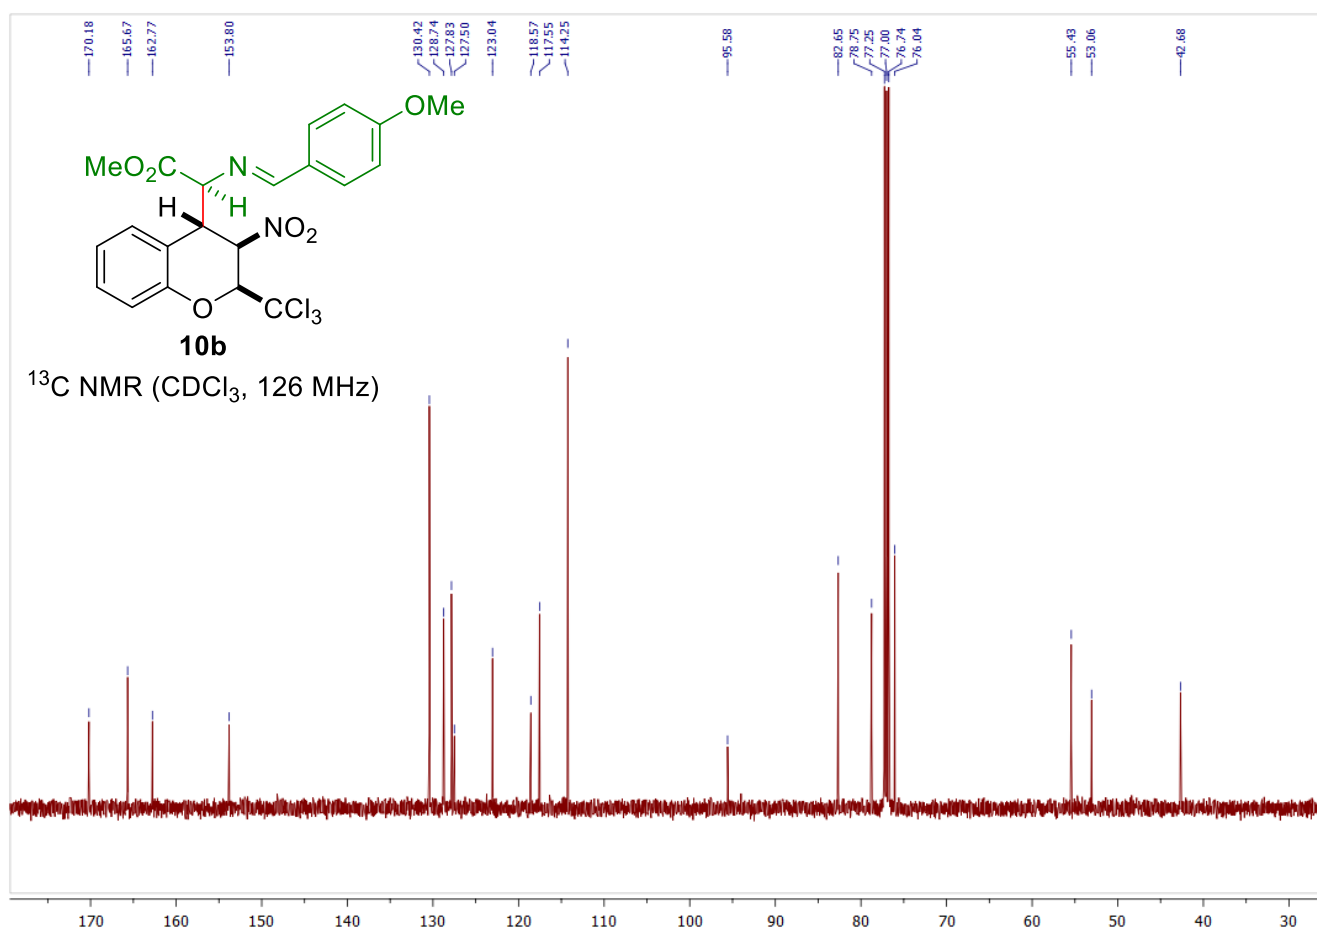

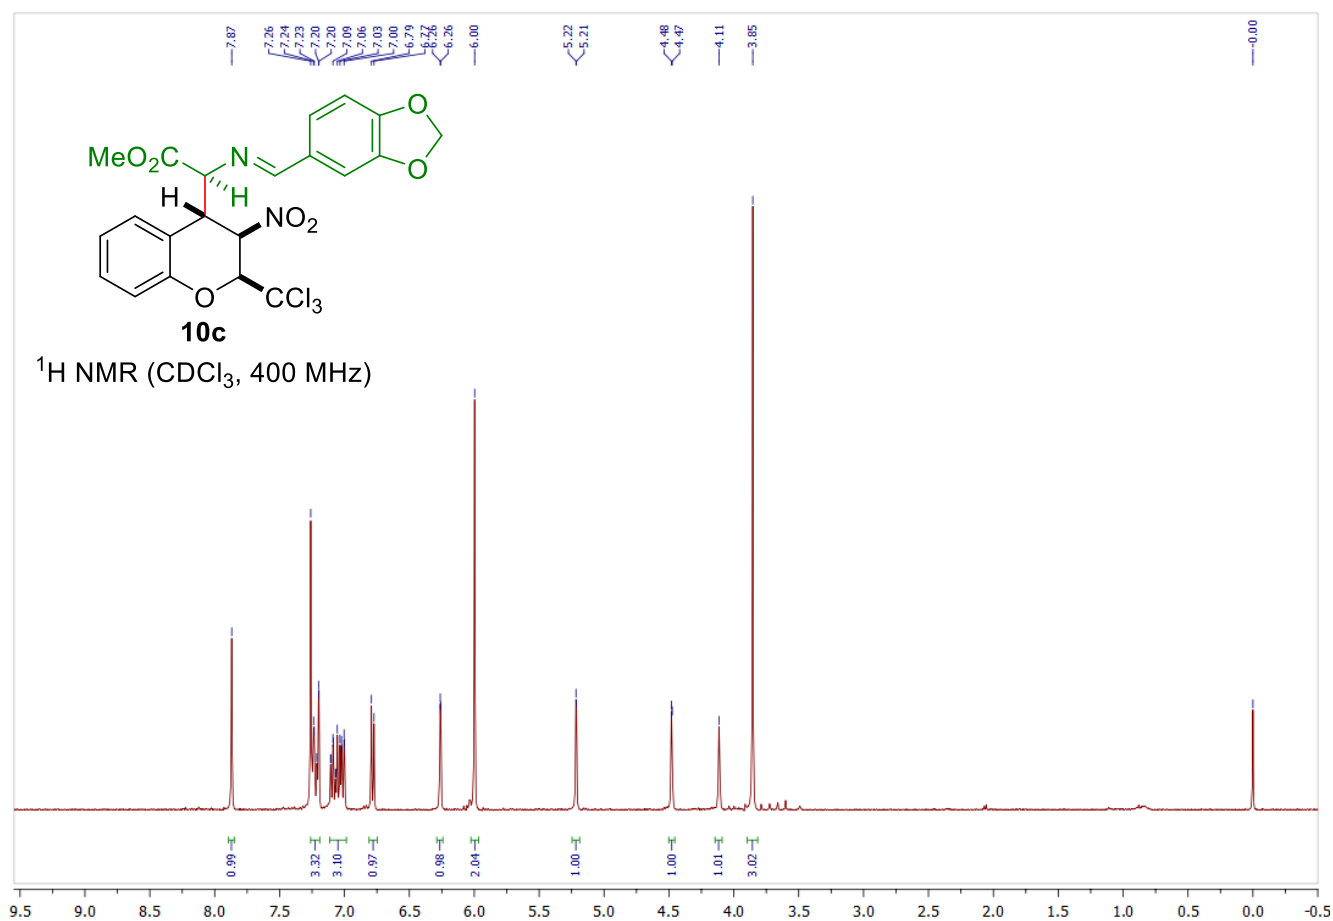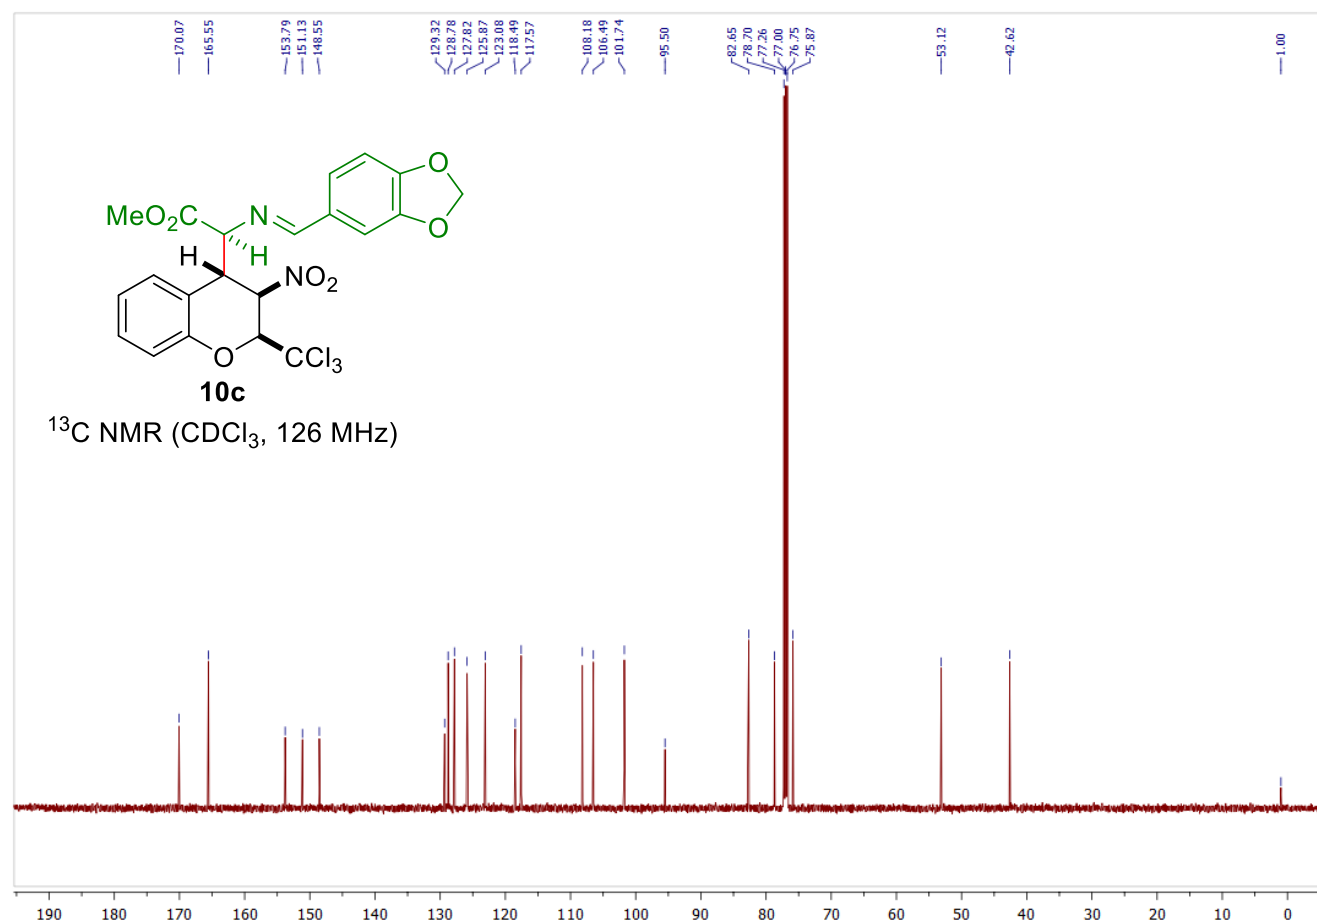

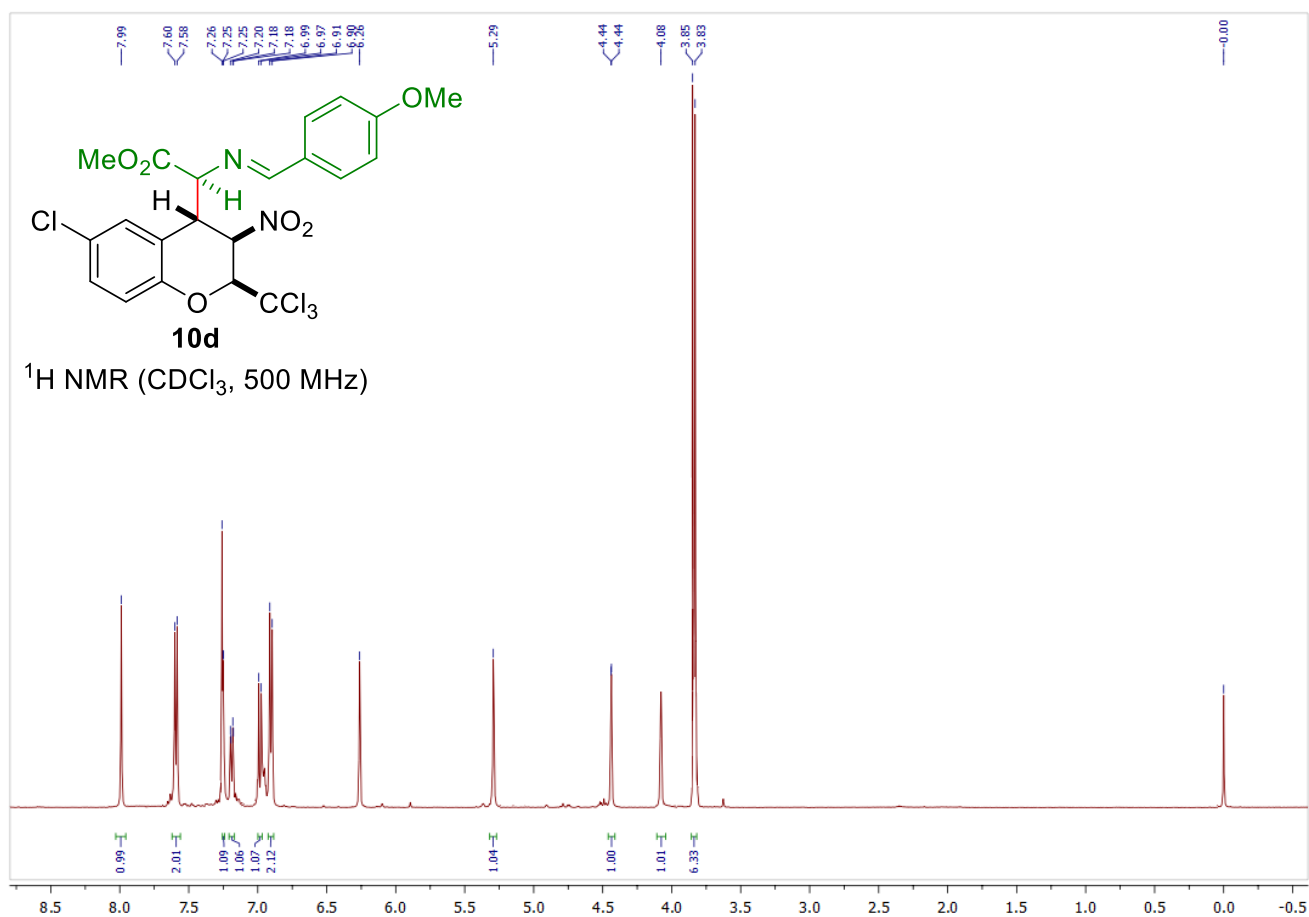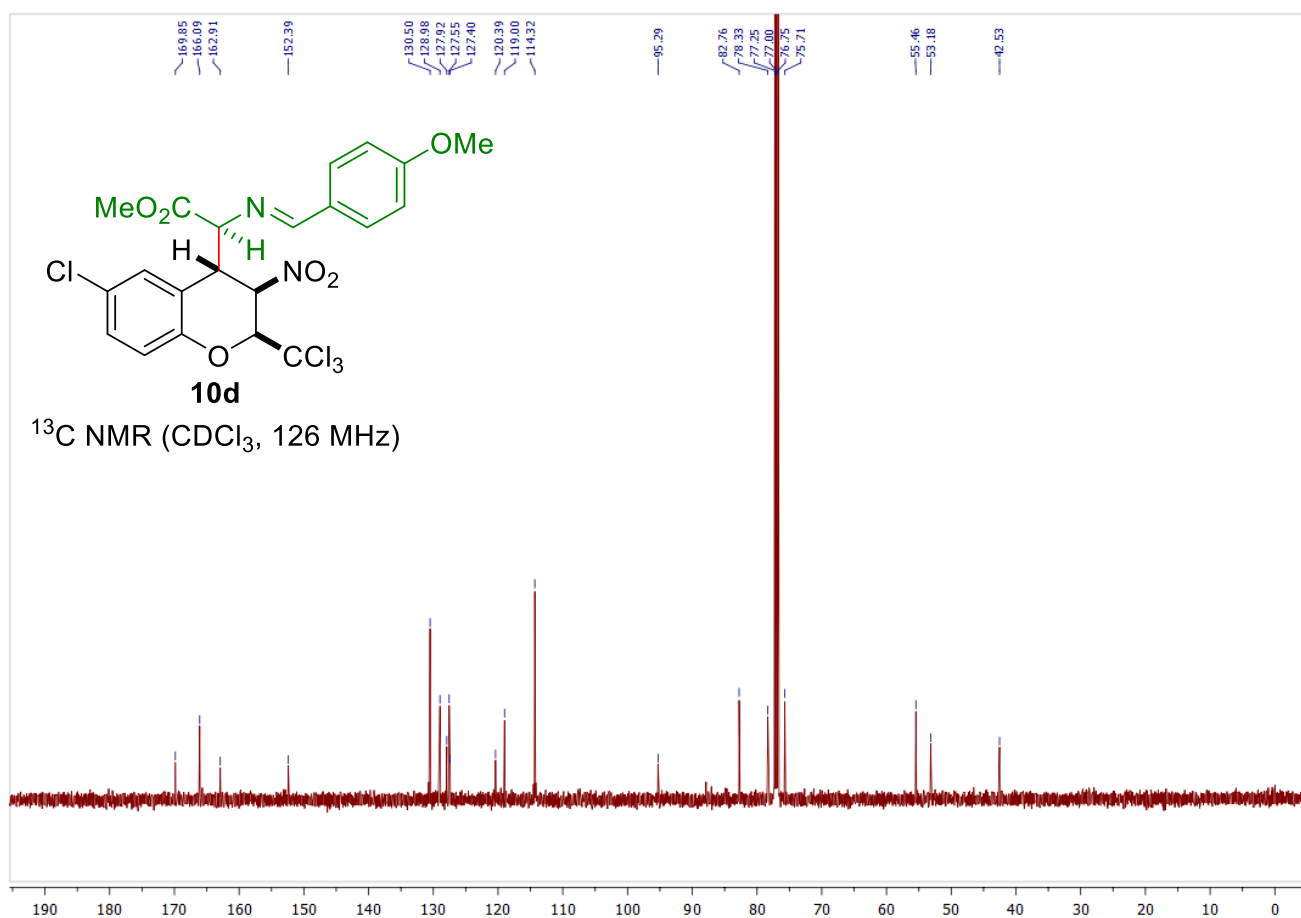

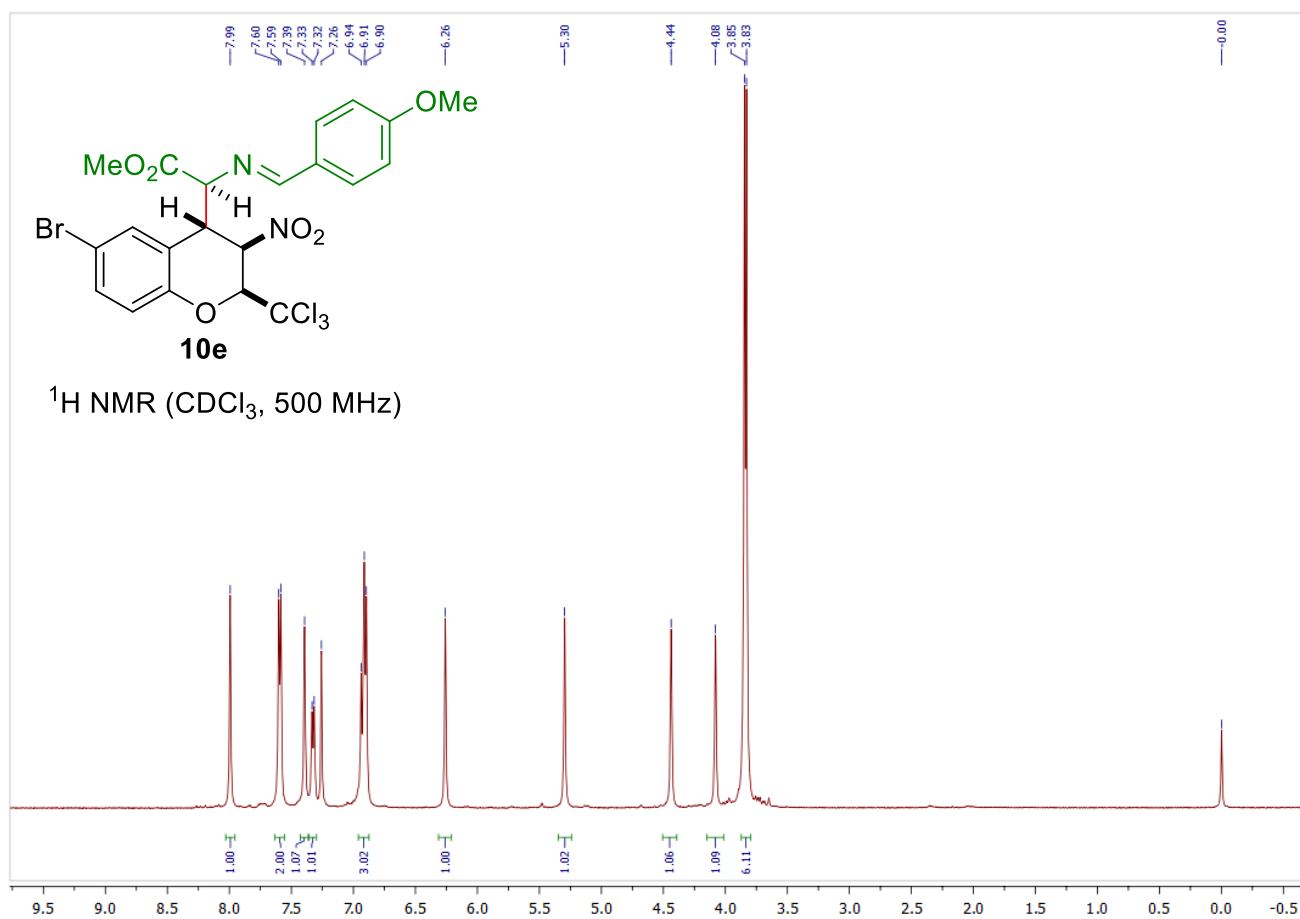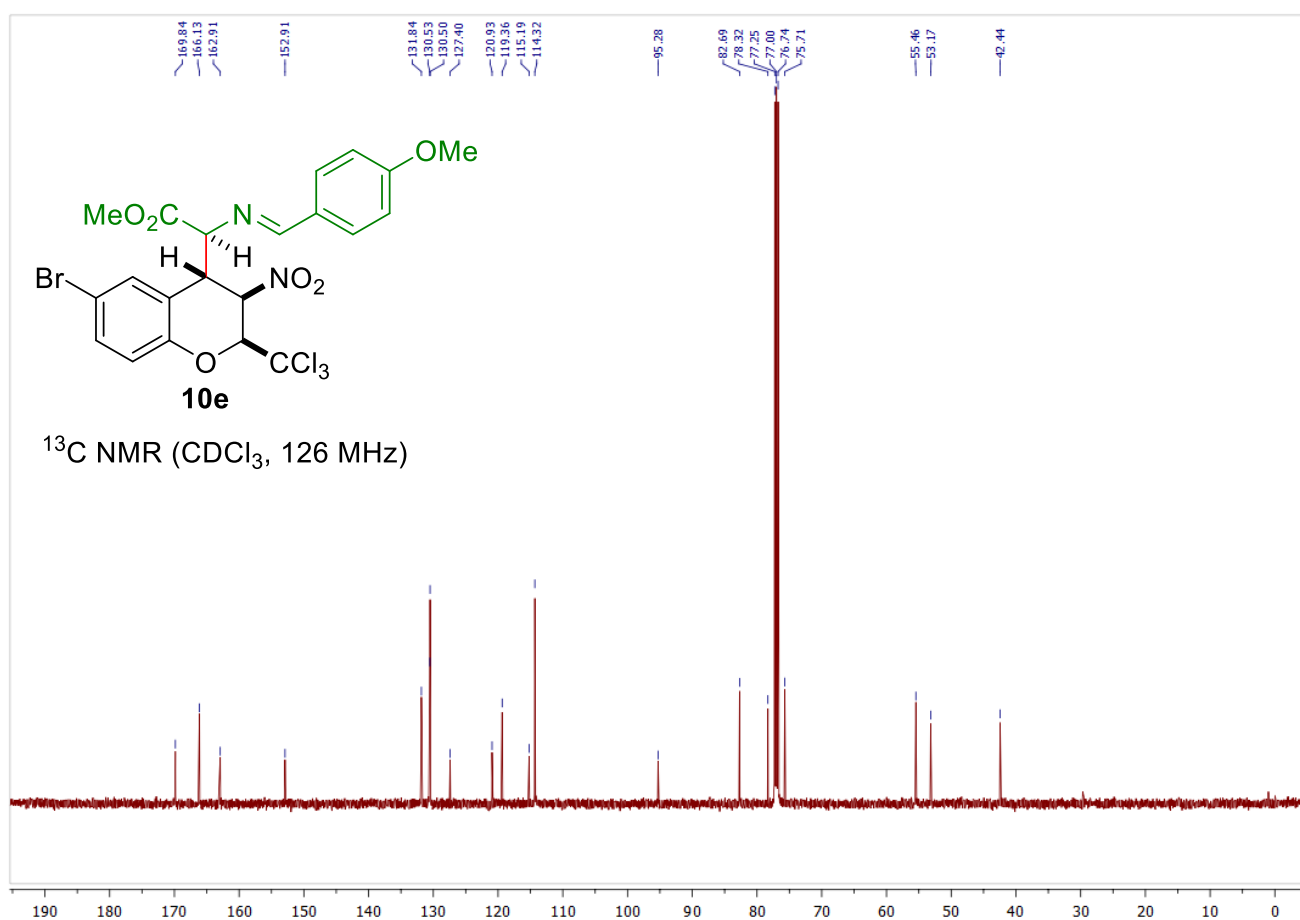



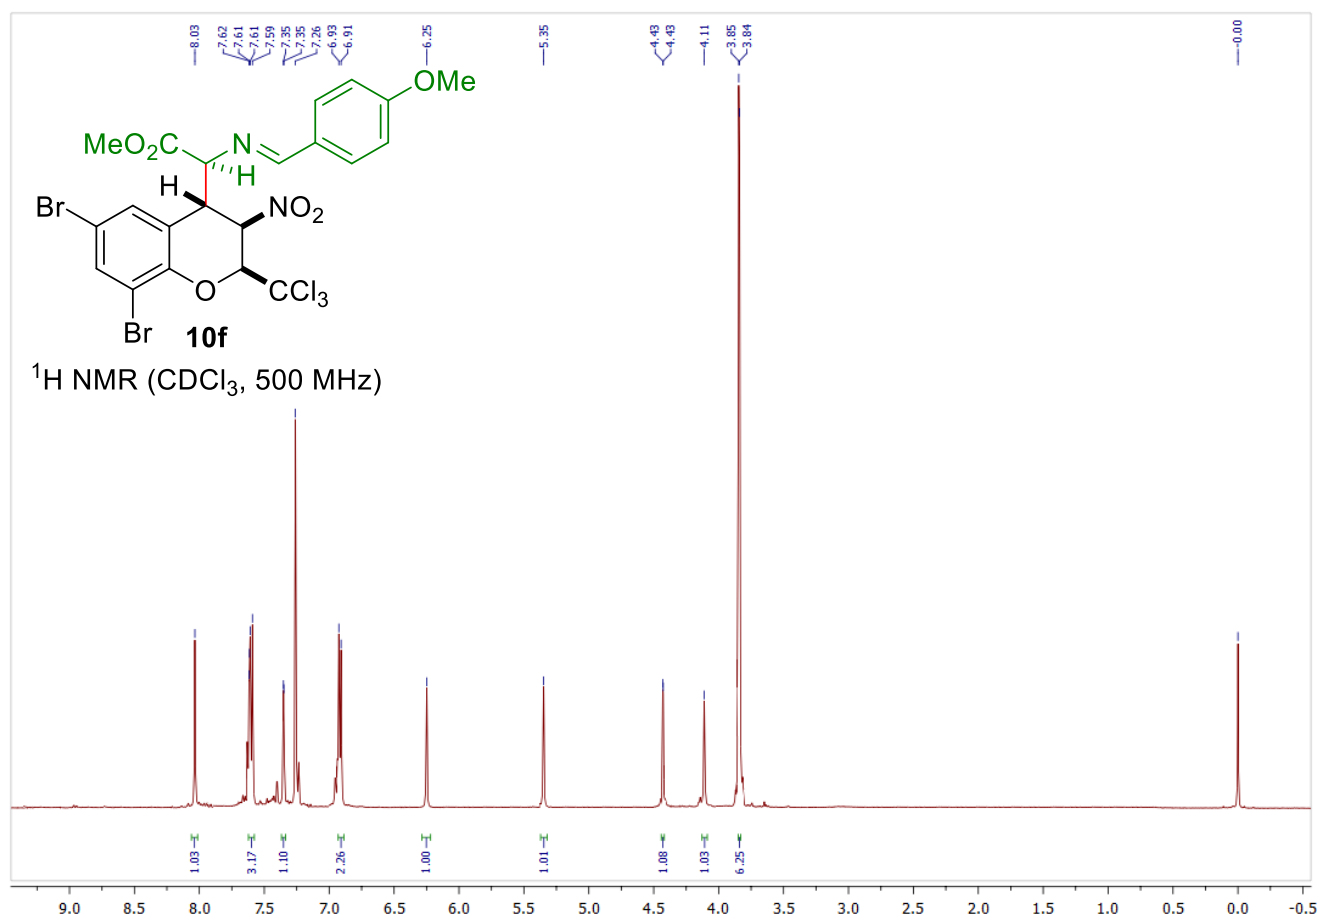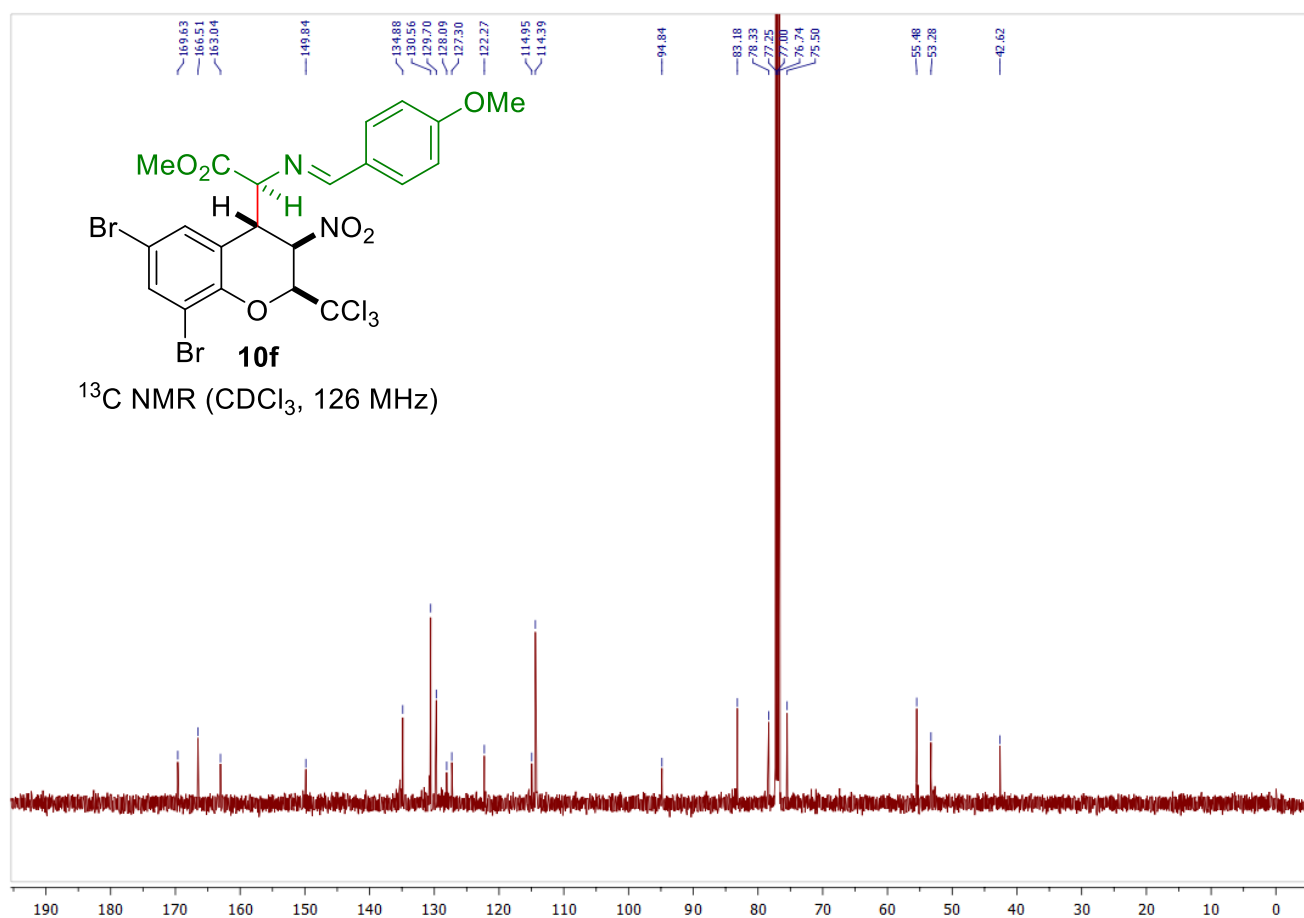

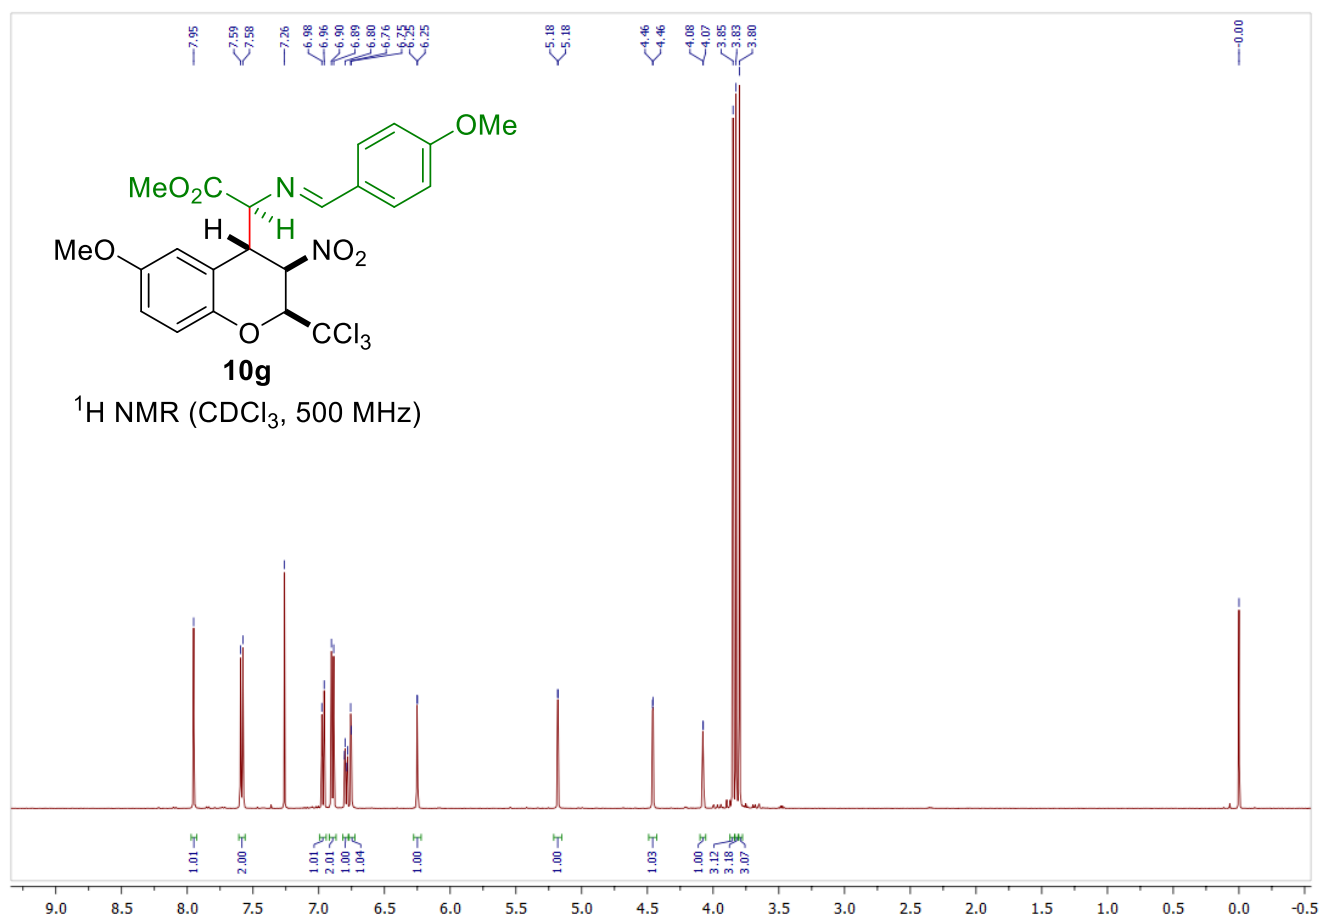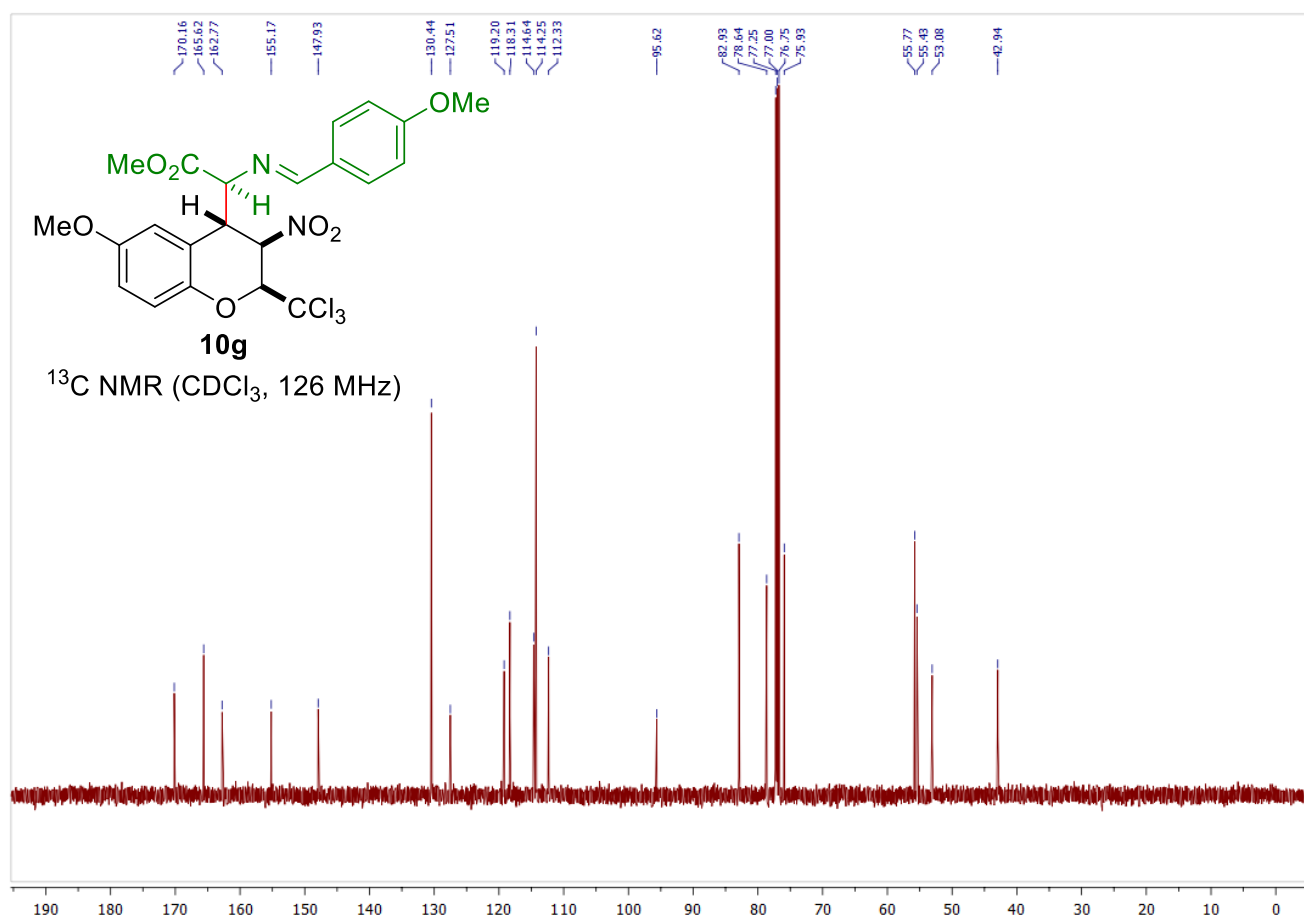

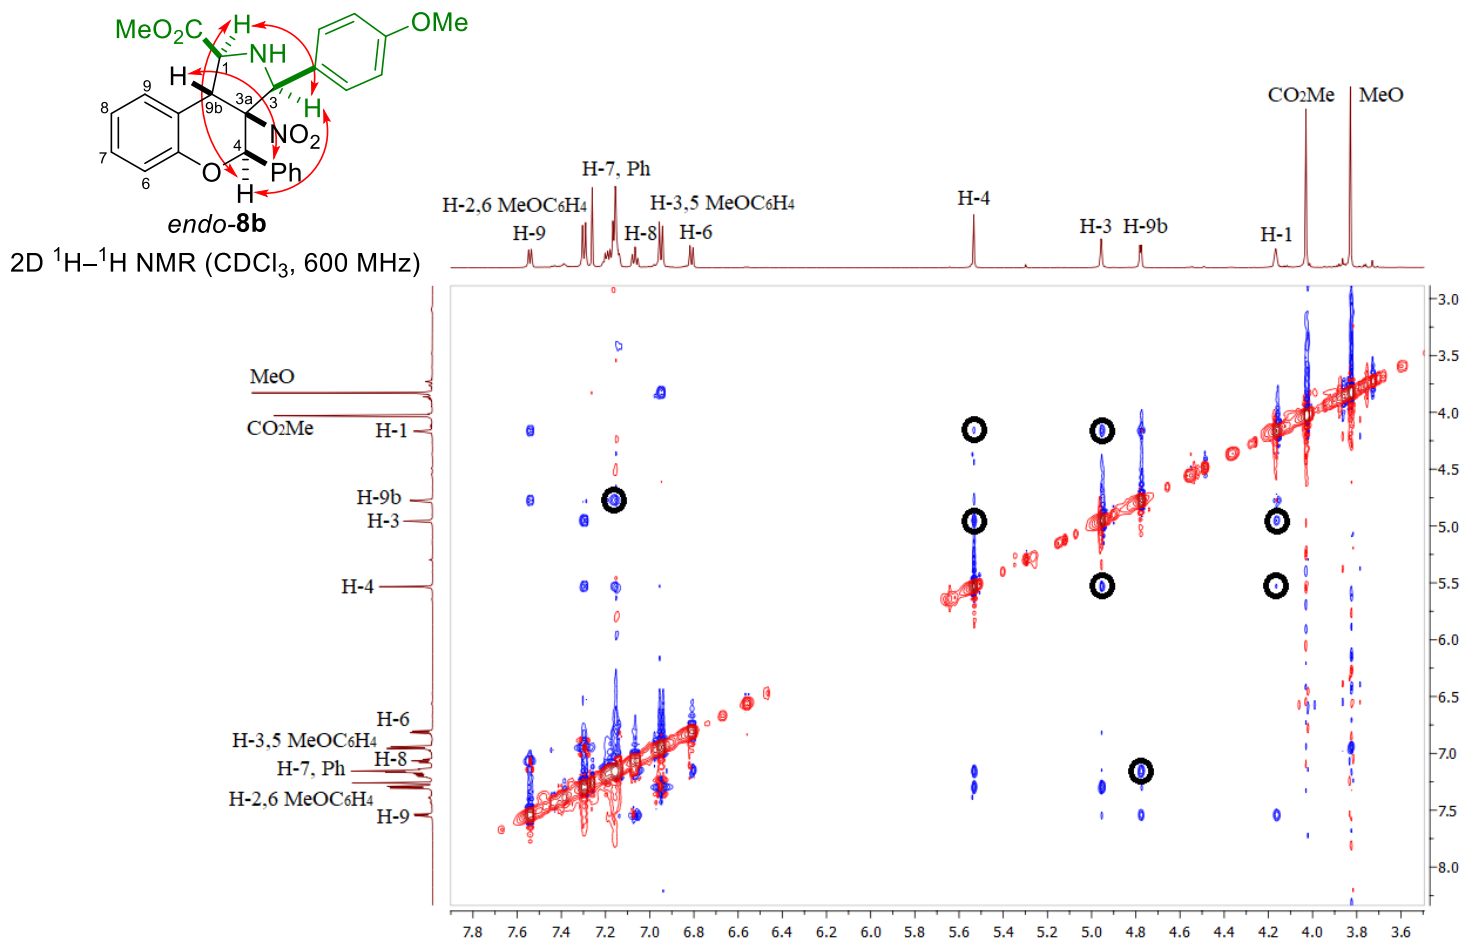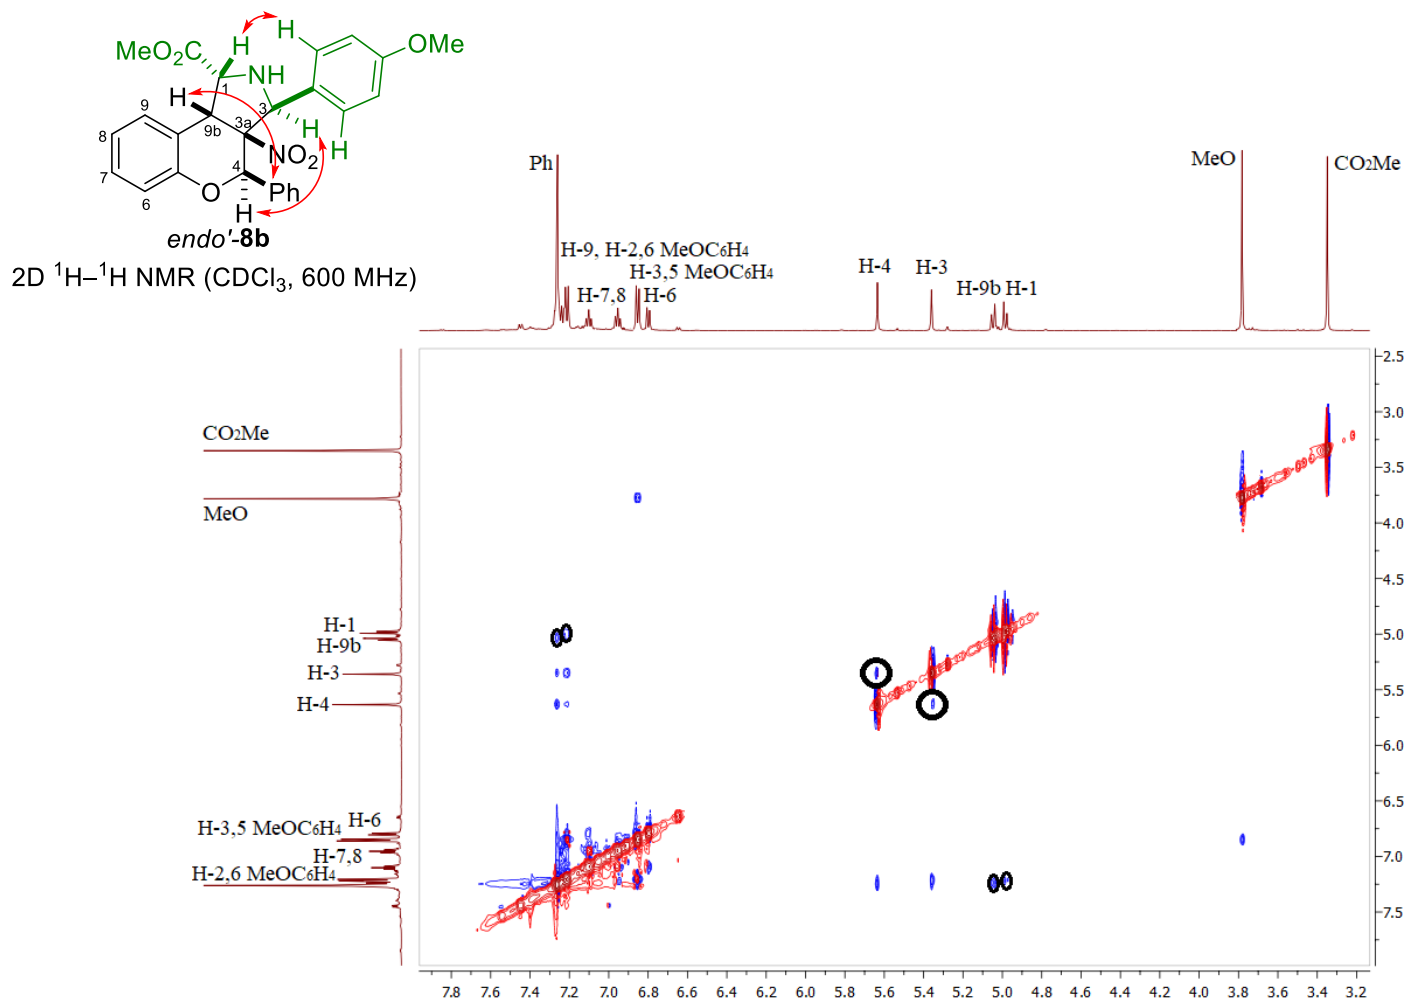

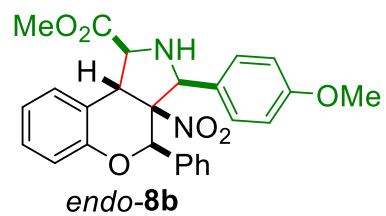

2D  $^1\text{H}$ - $^{13}\text{C}$  HSQC NMR  
( $\text{CDCl}_3$ , 600 MHz)

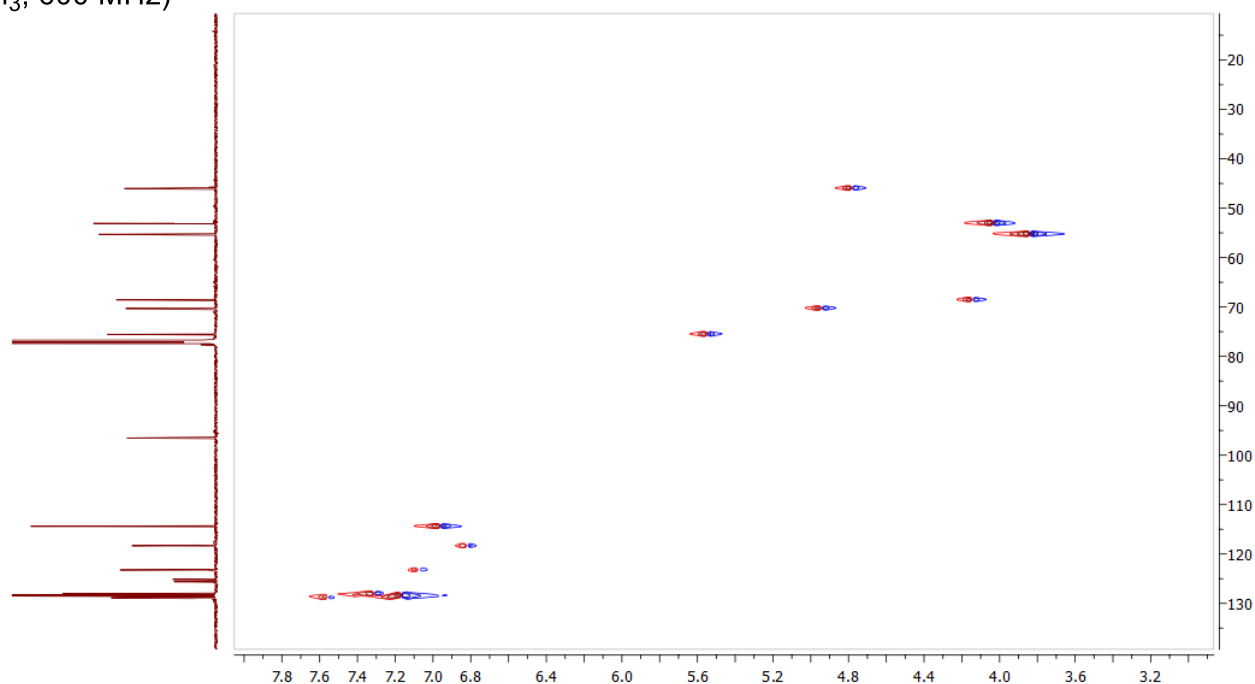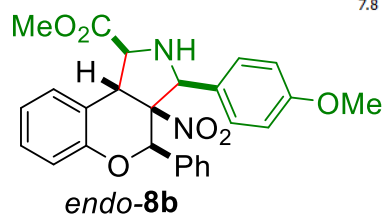

2D  $^1\text{H}$ - $^{13}\text{C}$  HMBC NMR  
( $\text{CDCl}_3$ , 600 MHz)

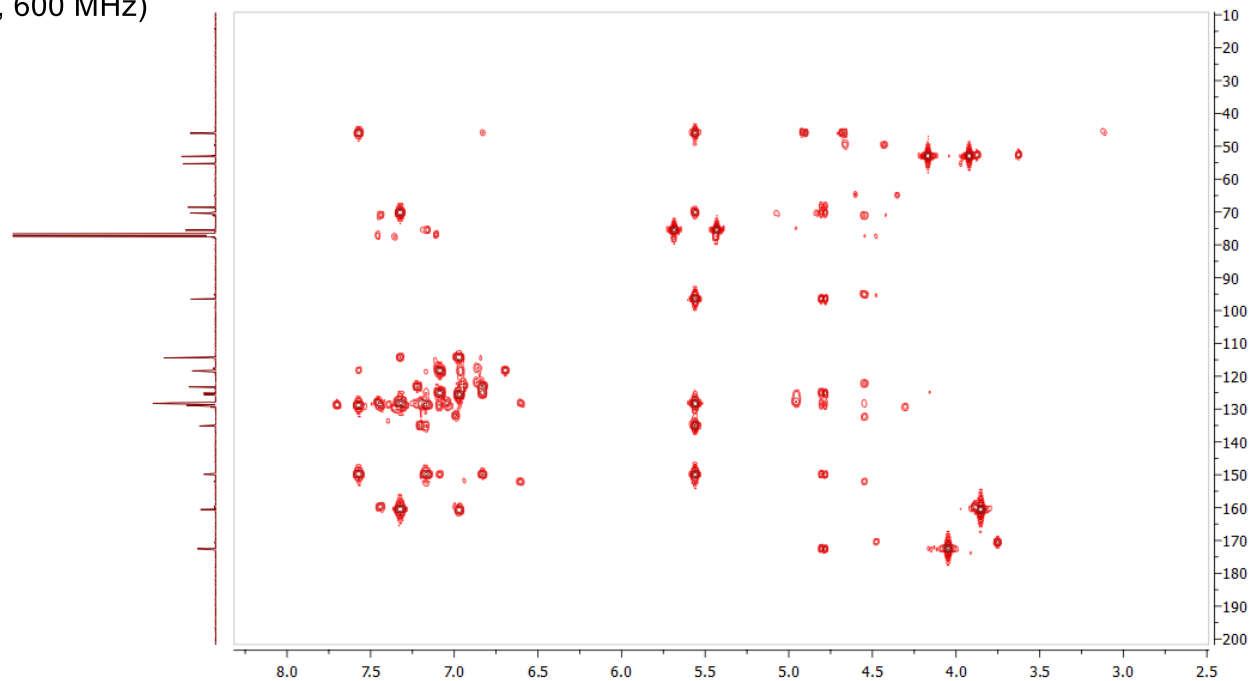

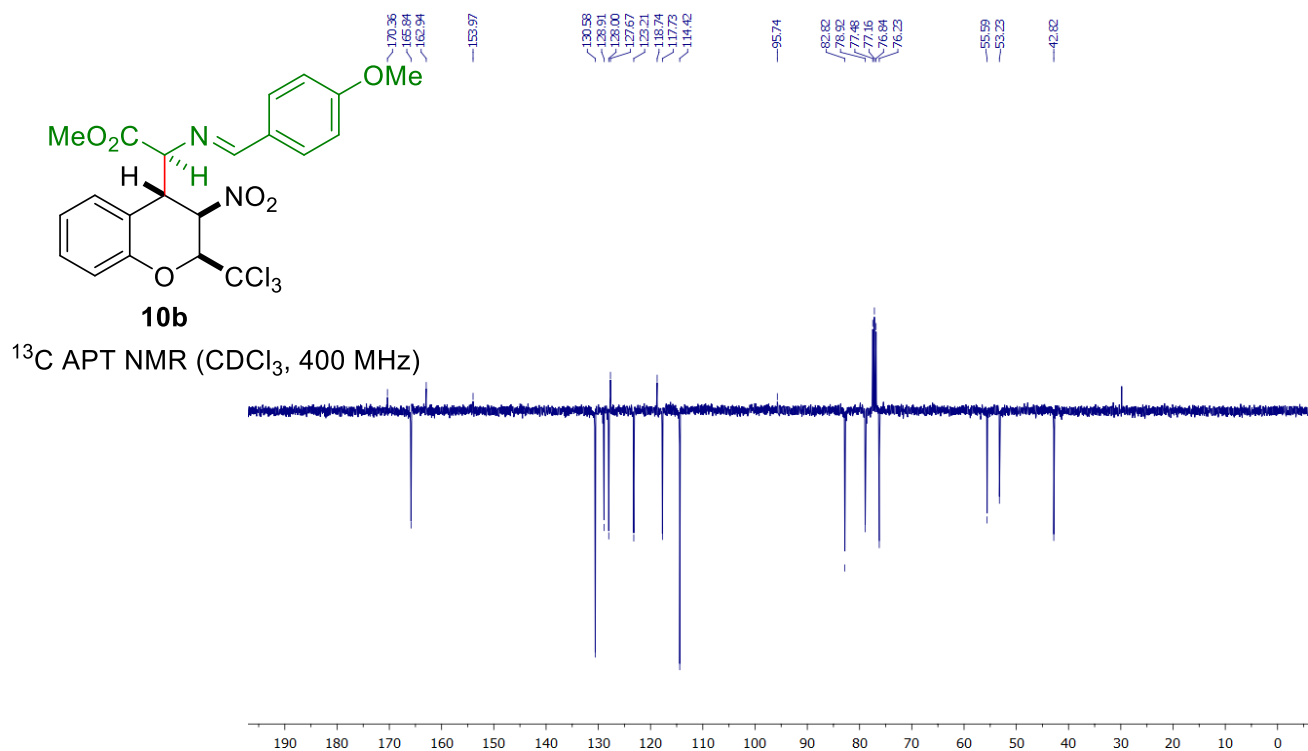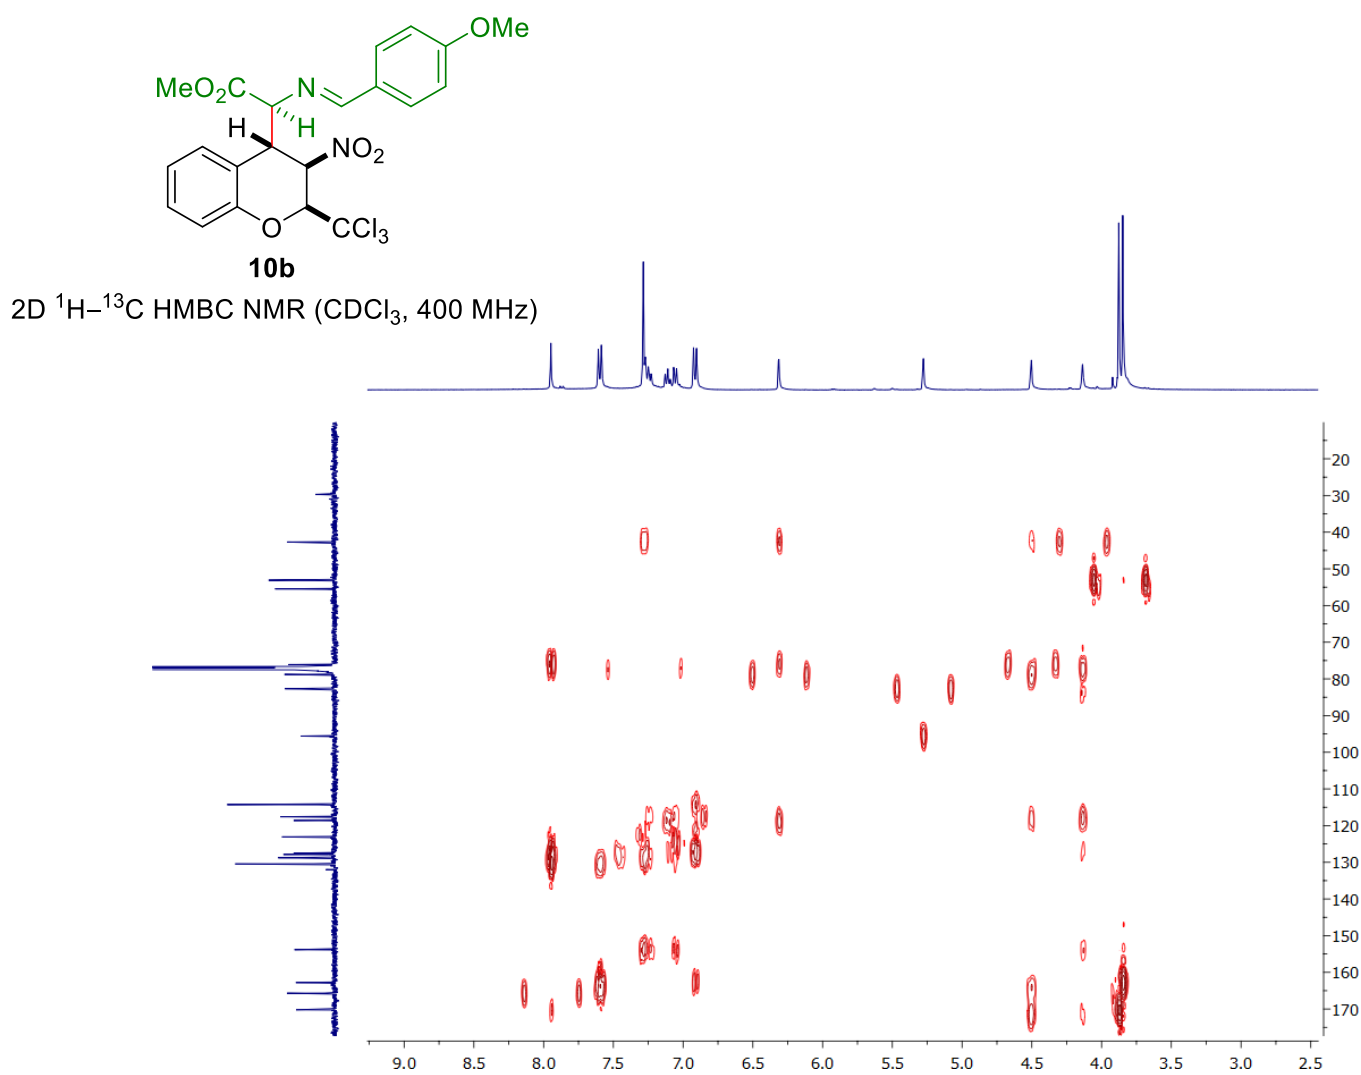

## X-ray crystallography

Crystals of compounds *endo-8b*, *endo-9a* and **10c** were grown by slow evaporation of an ethyl acetate solution. Diffraction data for *endo-8b* and *endo-9a*, **10c** were collected on an Xcalibur Eos and Xcalibur 3 automatic diffractometers, respectively, using the standard procedure (Mo-K $\alpha$  radiation ( $\lambda = 0.71073$  Å), graphite monochromator,  $\omega$ -scanning, 295(2) K). An empirical adjustment for absorption was introduced. The structures were solved by direct methods and refined by the full-matrix least-squares method using the SHELX-97 program package [1]. All non-hydrogen atoms were refined with anisotropic atomic displacement and hydrogen atoms were included at the calculated positions using a riding model. The geometrical parameters were analysed using the program OLEX2 [2].

**Crystal data for *endo-8b* (C<sub>26</sub>H<sub>24</sub>N<sub>2</sub>O<sub>6</sub>, 460.49).** Triclinic crystals, space group  $P\bar{1}$ ,  $a = 9.9193(7)$ ,  $b = 11.0749(6)$  and  $c = 11.3940(6)$  Å,  $\alpha = 88.132(4)$ ,  $\beta = 68.824(6)$  and  $\gamma = 75.357(5)^\circ$ ,  $V = 1126.86(11)$  Å<sup>3</sup>,  $D_c = 1.357$ , absorption coefficient  $\mu = 0.097$  mm<sup>-1</sup>,  $Z = 2$ . The intensities of 5100 independent reflections ( $R_{\text{int}} = 0.0185$ ) were measured. The final discrepancy factors  $R_1 = 0.0492$ ,  $wR_2 = 0.1034$ , GooF = 1.000 for 3339 reflections with  $I > 2\sigma(I)$ ;  $R_1 = 0.0852$ ,  $wR_2 = 0.1218$  (all data). Largest different peaks and holes: 0.21 and  $-0.22$  e Å<sup>-3</sup>. Completeness to  $\Theta = 26.32$  (98.67%). Deposition number CCDC 2213942.

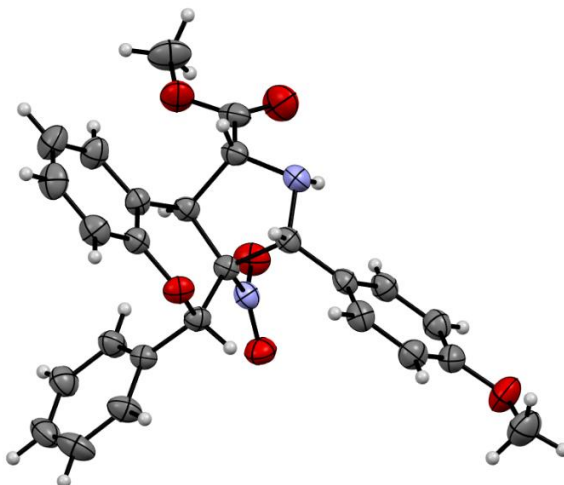

Molecular structure of compound *endo-8b* (ORTEP drawing, 50% probability level)

**Crystal data for *endo-9a* (C<sub>20</sub>H<sub>17</sub>F<sub>3</sub>N<sub>2</sub>O<sub>5</sub>, 422.36).** Monoclinic crystals, space group  $P2_1/n$ ,  $a = 16.1467(13)$ ,  $b = 12.4054(7)$  and  $c = 19.6639(17)$  Å,  $\beta = 106.101(8)^\circ$ ,  $V = 3784.3(5)$  Å<sup>3</sup>,  $D_c = 1.483$ , absorption coefficient  $\mu = 0.126$  mm<sup>-1</sup>,  $Z = 8$ . The intensities of 10373 independent reflections ( $R_{\text{int}} = 0.0544$ ) were measured. The final discrepancy factors  $R_1 = 0.0524$ ,  $wR_2 = 0.0978$ , GooF = 0.982 for

4180 reflections with  $I > 2\sigma(I)$ ;  $R_1 = 0.1600$ ,  $wR_2 = 0.1492$  (all data). Largest different peaks and holes: 0.17 and  $-0.20 \text{ e } \text{\AA}^{-3}$ . Completeness to  $\theta = 25.24$  (99.6%). Deposition number CCDC 2213944.

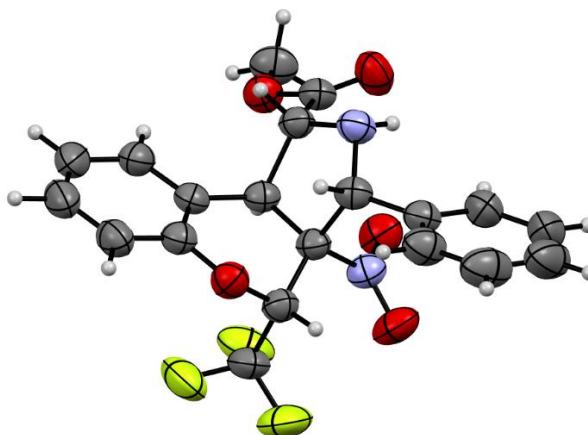

Molecular structure of compound *endo*-**9a** (ORTEP drawing, 50% probability level)

**Crystal data for 10c** ( $\text{C}_{21}\text{H}_{17}\text{Cl}_3\text{N}_2\text{O}_7$ , 515.72). Monoclinic crystals, space group  $P2_1/n$ ,  $a = 10.7321(16)$ ,  $b = 15.9306(14)$  and  $c = 13.532(2) \text{ \AA}$ ,  $\beta = 96.095(12)^\circ$ ,  $V = 2300.5(5) \text{ \AA}^3$ ,  $D_c = 1.489$ , absorption coefficient  $\mu = 0.444 \text{ mm}^{-1}$ ,  $Z = 4$ . The intensities of 5629 independent reflections ( $R_{\text{int}} = 0.0779$ ) were measured. The final discrepancy factors  $R_1 = 0.0664$ ,  $wR_2 = 0.1626$ ,  $\text{GooF} = 0.959$  for 2034 reflections with  $I > 2\sigma(I)$ ;  $R_1 = 0.1863$ ,  $wR_2 = 0.2342$  (all data). Largest different peaks and holes: 0.33 and  $-0.41 \text{ e } \text{\AA}^{-3}$ . Completeness to  $\theta = 25.24$  (98.8%). Deposition number CCDC 2213943.

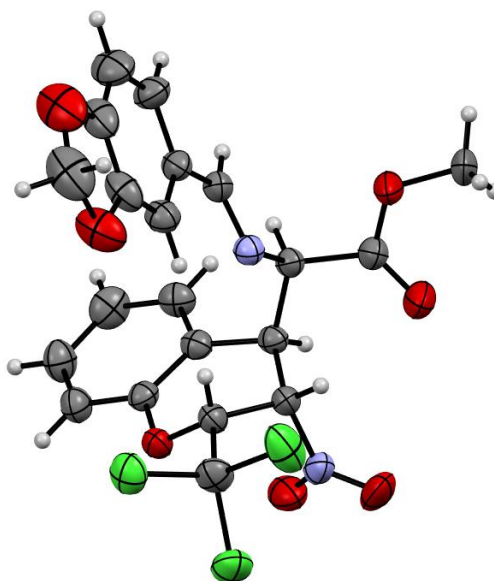

Molecular structure of compound **10c** (ORTEP drawing, 30% probability level)

## References

44. Sheldrick, G.M. A short history of SHELX. *Acta Crystallogr.* **2008**, *64*, 112–122.
45. Dolomanov, O. V.; Bourhis, L. J.; Gildea, R. J.; Howard, J. A. K.; Puschmann, H. OLEX2: A complete structure solution, refinement and analysis program. *J. Appl. Crystallogr.* **2009**, *42*, 339–341.
